# Supplementary material for: Benefits of the ‘village’: a qualitative exploration of the patient experience of COPD in rural Australia
Source: PubMed Central journal article supplement — BMJ Open. 2019 Oct 7;9(10):e030953. doi: 10.1136/bmjopen-2019-030953 (PMC6797421; doi:10.1136/bmjopen-2019-030953), 2019-10-07
Supplement: bmjopen-2019-030953.draft_revisions.pdf [file bmjopen-2019-030953.draft_revisions.pdf]

# BMJ Open

BMJ Open is committed to open peer review. As part of this commitment we make the peer review history of every article we publish publicly available.

When an article is published we post the peer reviewers' comments and the authors' responses online. We also post the versions of the paper that were used during peer review. These are the versions that the peer review comments apply to.

The versions of the paper that follow are the versions that were submitted during the peer review process. They are not the versions of record or the final published versions. They should not be cited or distributed as the published version of this manuscript.

BMJ Open is an open access journal and the full, final, typeset and author-corrected version of record of the manuscript is available on our site with no access controls, subscription charges or pay-per-view fees (<http://bmjopen.bmj.com>).

If you have any questions on BMJ Open's open peer review process please email [info.bmjopen@bmj.com](mailto:info.bmjopen@bmj.com)

# BMJ Open

## The benefits of the 'village': a qualitative exploration of the patient experience of COPD in rural Australia

|                               |                                                                                                                                                                                                                                                   |
|-------------------------------|---------------------------------------------------------------------------------------------------------------------------------------------------------------------------------------------------------------------------------------------------|
| Journal:                      | <i>BMJ Open</i>                                                                                                                                                                                                                                   |
| Manuscript ID                 | bmjopen-2019-030953                                                                                                                                                                                                                               |
| Article Type:                 | Research                                                                                                                                                                                                                                          |
| Date Submitted by the Author: | 24-Apr-2019                                                                                                                                                                                                                                       |
| Complete List of Authors:     | Glenister, Kristen; University of Melbourne Bookshop, Department of Rural Health;<br>Haines, Helen; University of Melbourne Bookshop, Department of Rural Health<br>Disler, Rebecca; University of Melbourne Bookshop, Department of Rural Health |
| Keywords:                     | Chronic airways disease < THORACIC MEDICINE, PRIMARY CARE, QUALITATIVE RESEARCH                                                                                                                                                                   |
|                               |                                                                                                                                                                                                                                                   |

SCHOLARONE™  
Manuscripts

1  
2  
3  
4  
5  
6  
7  
8 **TITLE:** The benefits of the 'village': a qualitative exploration of the patient experience of  
9  
10 COPD in rural Australia

11  
12 **Running title: COPD management in a rural setting**  
13  
14

15  
16  
17 **Authors**

18  
19 Glenister, Kristen<sup>a</sup>, Haines, Helen, Disler, Rebecca<sup>a</sup>  
20

21 **Affiliations**

22  
23 a. Department of Rural Health, Faculty of Medicine, Dentistry and Health  
24 Sciences | University of Melbourne  
25

26  
27 Corresponding Author:

28  
29 Dr Kristen Glenister

30  
31 Research Fellow, Rural Chronic Ill Health

32  
33 Department of Rural Health

34  
35 'The Chalet'

36  
37 Docker Street, Wangaratta, 3677.

38  
39 Australia

40  
41 +61 3 5823 4532

42  
43 [kristen.glenister@unimelb.edu.au](mailto:kristen.glenister@unimelb.edu.au)  
44

45  
46 Twitter: [@kristenglenist1](https://twitter.com/kristenglenist1), [@HelenHaines1](https://twitter.com/HelenHaines1), [@RebeccaDisler](https://twitter.com/RebeccaDisler)  
47  
48  
49

50 **Author contributions:** (1) the conception and design of the study, or acquisition of data, or  
51 analysis and interpretation of data: KG, HH, RTD, (2) drafting the article or revising it critically  
52 for important intellectual content: KG, HH, RTD, (3) final approval of the version to be  
53 submitted: KG, HH, RTD.  
54  
55  
56  
57  
58  
59  
60

**ABSTRACT**

**TITLE:** The benefits of the 'village': a qualitative exploration of the patient experience of COPD in rural Australia

**Objectives:** This study sought to explore patients' experiences of living with and adapting to COPD in the rural context. Specifically, our research question was 'What are the barriers and facilitators to living with and adapting to COPD in rural Australia?'

**Design:** Qualitative, semi-structured interviews. Conversations were recorded, transcribed verbatim and analysed using thematic analysis following the consolidated criteria for reporting qualitative research (COREQ) guidelines.

**Setting:** Patients with COPD, admitted to a sub-regional hospital in Australia were invited to participate in interviews between October and November 2016.

**Main outcome measures:** Themes were identified that assisted with understanding of the barriers and facilitators to living with and adapting to COPD in the rural context.

**Results:** Four groups of themes emerged: *Internal Facilitators* (coping strategies; knowledge of when to seek help) and *External Facilitators* (Centrality of a known doctor; health team 'going above and beyond'; and social supports) and *Internal and External Barriers to COPD self-management* (loss of identity, lack of access and clear communication, socio-cultural challenges), that were moderated by feelings of inclusion or isolation in the rural community or 'village'.

**Conclusions:** Our findings suggest that community inclusion enhances patient's ability to cope and ultimately self-manage COPD. This is facilitated by living in a supportive 'village' environment, and included a central, known doctor and health team willing to go 'above and beyond'. Understanding, or supplementing, these social networks within the broader social structure may assist people to manage chronic disease, regardless of rural or metropolitan location.

**Key words (4-10):** Chronic obstructive pulmonary disease; general practice; rural; self-management; qualitative.

1  
2  
3 **What is already known about this topic?**  
4

- 5
- 6 • **Optimal care of COPD is patient centred, integrated and based upon self-management with**  
7 **early access to specialist care**
  - 8 • **Self-management of COPD is more difficult for older patients and those living alone**
  - 9 • **COPD care in rural areas is typically delivered by a more generalist health care team**
- 10  
11  
12  
13

14 **What this study adds:**  
15

- 16
- 17 • **Community inclusion within a ‘village’ context impacts experience of COPD**
  - 18 • **Patients experience social inclusion through long term, quality relationships with health**  
19 **professionals and within social networks**
  - 20 • **Patients who experience inclusion adapt more easily to life with COPD and to the self-**  
21 **management approach**
- 22  
23  
24  
25  
26  
27  
28  
29

30 **Article summary:**  
31

- 32
- 33 • **Exploration of a range of social, emotional and health service related supports**
  - 34 • **Exploration in the rural context**
  - 35 • **Qualitative, in depth exploration of the patient experience**
  - 36 • **Limitation: it is unknown whether the findings are specific to rural context**
  - 37 • **Limitation: the impact of social support on overall quality of life in rural context is**  
38 **not well understood**
- 39  
40  
41  
42  
43  
44  
45  
46  
47  
48  
49  
50  
51  
52  
53  
54  
55  
56  
57  
58  
59  
60

## INTRODUCTION

Chronic obstructive pulmonary disease (COPD) is a chronic condition characterised by non-reversible airways obstruction, cough, phlegm and dyspnoea.(1) COPD is the fourth leading cause of death globally.(2, 3) Social costs include significant disability, poor physical functioning, social isolation, and caregiver burden.(4) Disease trajectory involves progressive deterioration of lung function, decreasing quality of life, and increasing acute exacerbation frequency and hospitalisation.(5, 6) Management of COPD is complex and patients often live with multiple comorbid conditions and may have poor mental health.(7, 8) Optimal care of COPD is founded on seamless, integrated, patient-centred care delivered by a multidisciplinary team with an emphasis on self-management.(9) Engagement with self-management is associated with decreased hospital readmission (10) and increased quality of life.(11) However, research suggests that less than half of patients with COPD will achieve effective self-management, with younger patients and those living with others more able to address the complex disease management requirements.(10) Early access to specialist care enhances support for coordination and self-management of COPD in primary care,(12) with positive relationships with health professionals pointed to as facilitating navigation through and perceived quality of health care.(13)

In the rural context, workforce constraints restrict access to multidisciplinary, specialist providers, with care likely to be delivered by a smaller, more generalist team. A qualitative study in New Zealand found that care pathways for COPD care in rural contexts were unclear and poorly coordinated.(12) A recent study in the United States found that although access to diagnostic testing and specialists was restricted in rural clinics, quality and patterns of healthcare were similar for COPD between urban and rural clinics.(14) In a rural Canadian study, long-term relationships with general practitioners, community support and personalised care helped to overcome issues of restricted specialist access in COPD care.(15) In the Australian context, a study found that self-monitoring of symptoms and support from health professionals assisted patients to manage breathing difficulties and avoid emergency

1  
2  
3 department presentations.(16) Social inclusion and a sense of belonging in COPD has been shown to  
4  
5 influence a person's experience of living with COPD,(17, 18) however, less is known about this  
6  
7 experience in the rural context. Literature has pointed to a high degree of social capital within rural  
8  
9 communities and inclusion of those who belong within social networks,(19) however, the converse  
10  
11 has also been reported for those who do not experience this inclusion.(20) Following, a review of  
12  
13 qualitative research into chronic disease management in rural areas across North America, Europe,  
14  
15 Australia and New Zealand found that the rural environment offered several positive aspects, namely  
16  
17 personalised care, clinicians being better positioned to provide patient centred care and increased  
18  
19 community belonging which could counteract vulnerability. (21)  
20  
21  
22  
23  
24

25 Rural studies focussed on the experience of COPD from a patient's perspective are uncommon. This  
26  
27 study has sought to explore patient perspectives of living with and adapting to COPD in the rural  
28  
29 Australian context. Understanding patient perspectives on current barriers and facilitators will inform  
30  
31 rural workforce and care structure planning.  
32  
33  
34  
35

## 36 **Methods:**

### 37 **Design**

38  
39 Qualitative study using semi-structured interviews following the Consolidated criteria for reporting  
40  
41 qualitative research (COREQ) guidelines.(22) Thematic analysis was chosen as it allowed for synthesis  
42  
43 focused on a phenomenon of interest;(23) this being the experience of living with and adapting to  
44  
45 COPD in the rural context. Thematic analysis is also is a transparent method that actively seeks to  
46  
47 remain close to the primary data and avoids over analysis.(24)  
48  
49  
50  
51

### 52 **Sample and setting**

53  
54 A convenience sample of patients admitted to a sub-regional Australian hospital with a primary  
55  
56 diagnosis of COPD in the preceding twelve months. In this setting, people with COPD are typically  
57  
58 managed by General Practitioners with or without a Generalist Physician, and some are supported by  
59  
60

1  
2  
3 community allied health services including access to physiotherapists, occupational therapists and  
4  
5 social-workers in a pulmonary rehabilitation programme.  
6  
7  
8  
9

### 10 **Data collection**

11  
12 Semi-structured questions were developed in consultation with experts in the field of chronic illness  
13  
14 and community health care and sought to explore experiences of care coordination and living with  
15  
16 COPD in the rural context, and are listed as Appendix 1. Potential participants were sent an invitation  
17  
18 letter by the hospital following discharge. Interviews undertaken at a location chosen by the  
19  
20 participant. The female interviewer (KG, PhD ) had training in interviewing techniques and experience  
21  
22 in chronic disease management and health care delivery research. The interviewer had no prior or  
23  
24 ongoing relationship with the participants. Interviews were audio-recorded and transcribed verbatim.  
25  
26 Names of people and pets were changed to increase anonymity of participants. No additional data  
27  
28 available.  
29  
30  
31

### 32 **Data analysis**

33  
34 Thematic synthesis was completed in three stages by two or more authors as follows:(24-26) All data  
35  
36 were entered into NVivo11 QSR®, followed by line-by-line free coding of primary data (Stage 1) (two  
37  
38 researchers). Free codes were then organised into descriptive themes (Stage 2), with confirmation of  
39  
40 themes through discussion (two researchers).(24-26) Random selection of data extracts by a third  
41  
42 independent researchers ensured trustworthiness of the data coding and themes, with disagreements  
43  
44 resolved through discussion.(24-26) Lastly, central emergent analytical themes were developed  
45  
46 through group discussion (Stage 3) to provide a broader understanding and meaning to the data within  
47  
48 the context of patient's experiences of care coordination and living with COPD in the rural Australian  
49  
50 context (three researchers).(24-26) Transparency of method, the use of independent investigators,  
51  
52 and group discussion were used to promote the validity of findings, and rigor and trustworthiness of  
53  
54 the synthesis process.(24-26) Reflection was actively sought through discussion to minimise bias and  
55  
56 come to agreement as to data saturation.(27) The final themes, with quotes for illustrative purposes  
57  
58  
59  
60



1  
2  
3 are summarised in table 1.  
4

#### 5 **Ethics approval**

6  
7 Ethics approval was granted by (to be provided post blinded peer review) Human Research Ethics  
8  
9  
10 Committee (project 175, August 2016). Signed, informed consent was obtained from each interviewee.  
11

#### 12 **Patient and Public Involvement statement**

13  
14 This research involved patient interviews. Patients were not invited to comment on the study design  
15  
16 and were not consulted to develop patient relevant outcomes or interpret the results. Patients were  
17  
18 not invited to contribute to the writing or editing of this document for readability or accuracy. We  
19  
20 will disseminate results to study participants.  
21  
22

#### 23 **Transparency declaration:**

24  
25 The lead author affirms that this manuscript is an honest, accurate and transparent account of the  
26  
27 study being reported and that no important aspects of the study have been omitted, and that any  
28  
29 discrepancies from the study have been explained.  
30  
31  
32  
33

## 34 **RESULTS**

35  
36 Fourteen people with COPD consented to participate, along with a family member if they desired. No  
37  
38 participants dropped out of the study. Interviews were undertaken between October and November  
39  
40 2016, with a duration of 19 to 77 minutes.  
41  
42  
43  
44

#### 45 **Facilitators and barriers to COPD self-management in the rural context**

46  
47 Thematic analysis resulted in four groups of themes that influenced whether a person with COPD was  
48  
49 able to adapt to and ultimately self-manage their condition in the rural context, including: *Internal*  
50  
51 *Facilitators* (coping strategies; knowledge of when to seek help), *External Facilitators* (Centrality of a  
52  
53 known doctor; health team going above and beyond; and social supports) and *Internal Barriers* (loss  
54  
55 of identity), *External Barriers* (lack of access and clear communication, socio-cultural challenges).  
56  
57 These themes were furthermore moderated by feelings of 'inclusion' (feeling welcomed in the  
58  
59  
60

1  
2  
3 community) or 'isolation' (feeling emotionally separate from others in the community) within the rural  
4 context. These findings are summarised in Figure 1. Ability to adapt to the 'new normal' of life with  
5 COPD and self-manage COPD could be considered as a spectrum from positive (adaptation to the new  
6 normal with effective self-management) to negative (inability to adapt or self-manage). These themes  
7 are summarised in Figure 1.  
8  
9  
10  
11  
12  
13  
14  
15  
16  
17

### 18 **Internal Facilitators to COPD self-management**

19  
20 Internal facilitators that emerged from analysis were the development of coping strategies and  
21 learning when to seek help in the context of COPD self-management.  
22  
23  
24  
25  
26

#### 27 ***Coping strategies:***

28  
29 Learning to cope was a key theme with a matter of fact and 'making the best of things' approach taken  
30 to this new condition: *I didn't get depressed about (COPD diagnosis) or anything ... I thought well*  
31 *you've got it, you've got to live with it* (Participant (P)1). Adaptation to a new normal occurred through  
32 learning to coping strategies and accepting a new life pace: *'You have to perform at the rate your lungs*  
33 *will let you. So you get slower and slower, year-by-year.'*(P11) Specific approaches were used to  
34 manage symptoms fluctuations, with one participant voicing: *'Quite often I get attacks... during the*  
35 *night if the temperature drops suddenly... But I can control that quite often - I get up and make a cup*  
36 *of coffee and sit up in the chair ... then I go back to bed and I'm alright the next morning'*. Others  
37 discussed how they learnt how to retain activities that gave them joy: *'...we did a lot of dancing and if*  
38 *I got really hot I'd have to go out of the hall into the fresh air ... I'd go out there and I could settle my*  
39 *breathing down.'* (P1).  
40  
41  
42  
43  
44  
45  
46  
47  
48  
49  
50  
51  
52  
53  
54  
55

#### 56 ***Knowing when to seek help***

57  
58 Development of knowledge in how and when to seek help also facilitated adaptation and capacity for  
59  
60

1  
2  
3 self-management. Training in seeking help without delay was voiced as important to avoiding acute  
4 deterioration: *'Well; self-management, from what they've told me and what they've taught me, is to*  
5 *live as comfortably as you can with your disease you've got and don't "buggerise around if you get*  
6 *crook" [delay if you get sick].'*(P10). Recognising deterioration was important: *'You're either on a high*  
7 *or you're on a low. You can feel yourself going down.'*(P13), as was knowing when to access emergency  
8 services: *'Well if it gets to the stage where he can't breathe properly - into the hospital. That's just*  
9 *what we do'*(P5).

### 23 **External Facilitators to COPD self-management**

24 External facilitators related to the centrality of a known doctor; the health team going 'above and  
25 beyond', and social support.

#### 32 **Centrality of known doctor**

33 Continuity of care with practitioners led to supportive long-term relationships: *'He's (GP) my rock'* (P9)  
34 and *'if (doctor) were to leave and go somewhere else I don't know what I'd do.'*(P3). Coordination  
35 between health members was also raised as important: *'with different things she'd (GP) say 'I'll ring*  
36 *(specialist) and talk to her about it. So they worked hand in hand'* (P12). Integration of health  
37 professionals within the community also facilitated trust and confidence for patients to express their  
38 needs: *'(Doctor) happened to be one of my neighbours.... He asked 'how is Rufus (my dog)? How are*  
39 *you going? He even said 'what's your wife doing? Your clothesline is chock-a-block (full) every day'.*  
40 *Then he started talking, he says 'What is it?' I said, 'look mate, I'm not happy, I want to go home'* (P7).  
41 Rural workforce shortages can inhibit urgent care, however those with established relationships were  
42 accorded access: *'He said to me, if ever I can't get in, tell them I've got to see him'*(P9), similarly another  
43 patient voiced: *'I talk to the girls at the counter and I've got to book in three months ahead. I said I'm*  
44 *not booking into you for three months ahead - I said I'll ring you ... she puts me in every time'*(P13).  
45  
46  
47  
48  
49  
50  
51  
52  
53  
54  
55  
56  
57  
58  
59  
60

### **Health team going 'above and beyond'**

Throughout the interviews participants voiced how health professionals went 'above and beyond' to provide support, from simple presence: *'while I was in hospital (doctor) came in nearly every day and he didn't have to'*(P13), to assisting with community access: *'(Doctor) came 'round to my place and sat down with my medications. She took them up to the chemist herself and got them put into a Webster pack (Dosette-box)'*(P8). Several doctors went as far as providing their private contact details: *'We had to see (doctor) before we went on holiday and she'd give us her mobile number and "if anything happens, call me straight away"'* (P11). Assistance with policy constraints were also noted, these little and kind adjustments keenly felt by participants: *'They let us sneak through the door which brought us right in. Words cannot explain how great they were. We were so comfortable with all the staff that we could have asked them anything'* (P9).

### **Social support**

Community supports created the sense of an 'inclusive village', with non-health workers, such as bus drivers, supporting participants to be independent: *'They're great. They lift me up on the thing (disability access ramp) because I've got the oxygen'*(P6). Family and caregiver support were also clearly articulated both in day-to-day care but also with logistical challenges: *'The other night the power went off. So that's when you really need somebody ... you've got to go and get an oxygen bottle and set it up to breathe.'*(P6). Caregiver support extended to recognition of symptoms and decision-making, as well as recognising when to pace activities: *'(She) will pick very quickly if I'm tiring. You never say stop ... Just one more thing'* (P11).

Similarly, peer support was also raised in the context of community through pulmonary rehabilitation: *(Pulmonary rehabilitation) is amazing. Number 1, you go there for exercises. Number 2- beautiful to sit there and talk to the next person. They all got similar things ... We just listen to one another and then naturally crack up a joke or something ... We look after one another.*(P7)

## Internal Barriers to self-management of COPD

Loss of identity, lack of access and clear communication and socio-economic and cultural challenges were raised as the key barriers to self-management to COPD in the rural context.

### *Loss of Identity*

Participants expressed a loss of identity and psychological impact, particularly through changed work-life role: *'I was forced to retire. I didn't like the idea of it. I was depressed'* (P7). This was also expressed as loss of something that brought joy: *'I was that wrecked (by having to retire). It was unbelievable. I don't think that anybody would have loved their jobs as much I loved mine'* (P8). Emotional distress was also connected with the unrelenting nature of the condition: *'I thought, this is not worth it. What's the use in living when you suffer like this even though my mind is clear and everything?'* (P7). One caregiver also expressed distress at seeing the progressive decline and impact: *'He was deteriorating before my eyes. He also suffered depression because of all this pain'* (P13).

## External Barriers to self-management of COPD

### *Lack of access and clear communication*

Issues of staff retention in the rural workforce raised barriers to continuity and communication: *'You don't even get to know (the GPs), 18 months and they're gone'* (P14). Reduced numbers of health professionals also caused delays in access: *'I could only access her every six weeks at the least. You could never get her if you were sick.'*(P3) Similarly, limited alternatives left some participants to rely on emergency services: *'I've gone down to see a doctor, and I've clashed, or whatever. So they've rang an ambulance and said, go to hospital.'*(P8). Communication with unfamiliar clinicians also at times left some participants feeling in the dark: *'I was in hospital two weeks ago and it wasn't until a week after I got out, with my GP, that I actually found out what was the matter with me'* (P4). The need to continually re-tell their story was also a frustration when health professionals appeared to not

1  
2  
3 communicate with one another:  
4

5 *'there's been a few times where I've gone to emergency. You explain the situation - like, you're*  
6 *having trouble breathing as it is. They're trying to say oh, how long have you been like this for?*  
7 *Have [they] got any medical records? You'll see what's the matter with me is! And then the*  
8 *next doctor comes in for the next shift - they say oh, what are you here for? Talk to each other*  
9 *instead of having to ask the patients.'* (P8).  
10  
11  
12  
13  
14  
15  
16  
17  
18

### 19 **Socio-cultural challenges**

20  
21 In contrast to those who voiced positive social inclusion; others expressed social isolation: *I wasn't*  
22 *coping. I wasn't well enough to do my own food preparation ... I'm fairly new and I'm not a local - I*  
23 *didn't know anyone so you don't like asking someone'* (P14). In contrast to those afforded access  
24  
25 through established relationships, participants newly arrived felt disconnected from support:  
26  
27

28 *'The community clinic was the one that I accessed because they HAD TO take new patients.*  
29 *That was my only avenue at the time ... I needed to access somebody who knew me because*  
30 *[COPD] doesn't go by the record sort of thing ... when you get sick, you're sick enough to*  
31 *need care straight away'.*(P14)  
32  
33  
34  
35  
36  
37  
38

39 Financial impact was raised several times, with participants having to balance treatments choices as  
40 well as resource choices to stay well: *'We chose to increase the temperature of the house by a few*  
41 *degrees. It's just another cost'* (P11). Requirements to replace stoves for oxygen therapy safety was  
42  
43 an added burden, and support for such measures perceived to be influenced by social circumstance:  
44  
45 *'If you were living in Housing Commission you would be subsidised, but because we were (self-funded*  
46 *retirees) ... nothing'.*(P6).  
47  
48  
49  
50  
51  
52  
53  
54  
55  
56  
57  
58  
59  
60

**DISCUSSION (emphasise the village, rural, strength based, what is novel)**

This study explored patient experiences of living with and managing COPD in the rural context. Our results suggested that community inclusion, or inclusion in the 'village' context, moderated adaptation to a 'new normal' of living with COPD, and enhanced a person's ability to cope and ultimately self-manage their condition. Community inclusion also influenced whether a person experienced either a net balance of positive *facilitators* (knowledge of coping strategies and when to seek help, a central, known doctor, a health care team 'going above and beyond', social supports) or more pronounced balance of net negative *barriers* (loss of identity, lack of communication between health care team, socioeconomic or cultural disadvantage) to living with and managing COPD.

The benefits of social connection, social support, living with a caregiver, and peer support through pulmonary rehabilitation are well recognised in COPD and have been reported widely in previous literature (17, 28) and evident in the present study. These benefits have been shown to reduce the likelihood of smoking, increase exercise capacity, reduce emergency department visits and enhance coping.(29, 30) Conversely, loss of identity, (18) poor continuity of care from health professionals, poor communication between members of the health care team,(31) exclusion from social networks, and socioeconomic disadvantage are equally recognised as key barriers.(32) These influences are associated with reduced coping ability, decreased help seeking, (33) the need to continually repeat medical history, and are barriers to develop trusting relationships with health professionals. (34)

The strength of this study is the exploration of a range of medical, emotional and social supports, and the way these impact people living with COPD in the rural context. Our findings suggest that a rural 'village' exists, that encompasses supportive health professionals, family, friends and community members. The extent to which a person living with COPD is included in this 'village' is variable and has a marked influence on coping and management. Inclusion in the 'village', where one's neighbour could also be one's doctor or where family members were given the GP's private telephone number, was

1  
2  
3 strongly facilitative. There were many examples provided of close, trusting, long term relationships  
4 with doctors, health professionals 'going above and beyond', and social supports that enabled COPD  
5 management within the rural context. Similarly, self-management of COPD has been depicted as being  
6 built upon a pyramid of four categories of professionals (the patient (at the apex), partner, physician  
7 and the public's perception of the disease).(35) Perhaps this pyramid also depicts the source and  
8 importance of each category of people to a person living with COPD.  
9

10  
11  
12  
13  
14  
15  
16  
17  
18  
19 Previous studies have reported that COPD related symptoms and behaviours, such as coughing in  
20 public and wearing an oxygen mask, heighten feelings of self-blame due to historical smoking, and  
21 have been linked to feelings of loneliness and embarrassment. (17, 18) However, self-blame was not  
22 a prominent theme in this study, perhaps due to the protective aspects of social 'inclusion' within  
23 these established rural communities. Similarly, while much of rural health discourse focuses on deficits  
24 in care and experience,(36) and that respiratory care within the explored region is based on a rural  
25 generalist model, participants in this study did not speak of 'missing out' on services, information or  
26 access to specialists. This may be because those living in rural contexts are unaware of other models  
27 of care delivered through metropolitan centres, or that they believed they were receiving the care  
28 that met their needs, or the desire to receive services locally or from familiar people was more  
29 important than accessing a different model of care elsewhere. Further research is required to  
30 understand this perspective, given the unequivocal evidence that there is a lack of access to specialist  
31 services in this and other rural contexts.  
32  
33  
34  
35  
36  
37  
38  
39  
40  
41  
42  
43  
44  
45  
46  
47  
48  
49

50 This study was undertaken at a single site with a sample of people who had been hospitalised with  
51 COPD in the preceding 12 months. As such, it is likely to reflect only those perspectives of people who  
52 have been in recent contact with health services and were willing to undertake an interview. However,  
53 the strength of this work is that it provides important insights into rural healthcare experience and  
54 inclusively explored medical, social and emotional supports in this context.  
55  
56  
57  
58  
59  
60



1  
2  
3  
4  
5 The results of this study suggest that adaptation, coping and effective self-management can be  
6 enhanced via a range of medical, emotional and social supports. There is substantial value of  
7 pulmonary rehabilitation as a *de facto* community and the benefit of a social 'village' in supporting  
8 people with chronic progressive disease. Health professionals may consider assessing patients for level  
9 of social/community inclusion and connecting patients with available services in the community. This  
10 may be of particular importance given the relationship seen between social exclusion and sub-optimal  
11 coping.  
12  
13  
14  
15  
16  
17  
18  
19  
20  
21  
22

23 Social support is known to positively influence psychological health and self-efficacy of people with  
24 COPD, however, less is known about the benefits this confers on overall quality of life and physical  
25 functioning,(37) particularly in the rural context. (21) The benefit and experience of living in a  
26 supportive 'village' community could be further explored in the urban context to further understand  
27 the complexities of non-medical social and emotional support. Furthermore, the patient perspective  
28 of coping strategies and self-management approaches could be used to inform more user-friendly  
29 education material to address the recognised poor knowledge and understanding of COPD.(38)  
30  
31  
32  
33  
34  
35  
36  
37  
38  
39  
40

## 41 CONCLUSION

42  
43 In this study, the rural context offered an advantage for the people with COPD who experienced  
44 inclusion (in the 'village'), with the centrality of a known doctor and a health professional team willing  
45 to go 'above and beyond' key to this positive experience. Evidence of the benefit of strong social and  
46 family supports were noted, in line with prior studies. Understanding barriers and facilitators to  
47 supported COPD self-management will help inform future rural workforce and service development.  
48 Further research is needed to understand how social networks within the broader social structural  
49 conditions influence the way in which patients with live and manage their disease, and to compare  
50 experiences of COPD in rural and urban contexts.  
51  
52  
53  
54  
55  
56  
57  
58  
59  
60

1  
2  
3  
4  
5 **Acknowledgements:** We wish to thank the participants of this study and staff at the recruiting sites.  
6

7 We sincerely thank the team involved in the XXX project (details to be added following peer review).  
8  
9

10 **Conflicts of interest:** none  
11

12 **Funding:** This research did not receive any specific grant from funding agencies in the public,  
13 commercial or not-for-profit sectors. The authors are supported by the Australian Government  
14 Department of Health through the Rural Health Multidisciplinary Training Programme.  
15  
16  
17  
18  
19  
20  
21  
22  
23  
24  
25  
26  
27  
28  
29  
30  
31  
32  
33  
34  
35  
36  
37  
38  
39  
40  
41  
42  
43  
44  
45  
46  
47  
48  
49  
50  
51  
52  
53  
54  
55  
56  
57  
58  
59  
60

For peer review only

Table 1: Example of analysis process and illustrative quotes.

|                       | Category                  | Sub-category                             | Code                                   | Condensed meaning unit                                                      | Meaning unit                                                                                                                                                                                                                                                                                                                                                                         |
|-----------------------|---------------------------|------------------------------------------|----------------------------------------|-----------------------------------------------------------------------------|--------------------------------------------------------------------------------------------------------------------------------------------------------------------------------------------------------------------------------------------------------------------------------------------------------------------------------------------------------------------------------------|
| Internal facilitators | Coping Strategies         | Individual approaches to self-management | Matter of fact approach to COPD        | Making the best of things                                                   | I didn't get depressed about it (COPD diagnosis) or anything, no, I thought well you've got it, you've got to live with it <b>(P1)</b>                                                                                                                                                                                                                                               |
|                       |                           |                                          | Acceptance of slowed pace.             | There is no problem with her going on the train with the oxygen.            | It just slows you down                                                                                                                                                                                                                                                                                                                                                               |
|                       |                           |                                          | Learning approaches to manage symptoms | But I can control that... I go back to bed and I'm alright the next morning | There is no problem with her going on the train with the oxygen. So that's not a problem. It's just a matter of putting her on the train and the oxygen will last for eight hours. <b>(P3)</b>                                                                                                                                                                                       |
|                       |                           |                                          | Working to retain activities of joy    | I could settle my breathing down                                            | Quite often I get attacks - mild attacks - during the night if the temperature drops suddenly and it's cold, and I haven't had the heater on or something enough that can set me off. But I can control that quite often - I get up and make a cup of coffee and sit up in the chair and turn the heating on and then I go back to bed and I'm alright the next morning <b>(P14)</b> |
|                       |                           |                                          |                                        |                                                                             | ...we did a lot of dancing and if I got really hot I'd have to go out of the hall into the fresh air, I felt like I was suffocating in the hall and I'd go out there and I could settle my breathing down by getting the fresh air outside. <b>(P1)</b>                                                                                                                              |
|                       |                           |                                          |                                        |                                                                             | 'So he still goes out and enjoys that, but he doesn't dance every dance like he used to' <b>(P11)</b>                                                                                                                                                                                                                                                                                |
|                       | Knowing when to seek help | Knowing when to seek help                | Acting on warning signs                | Don't delay if you get unwell                                               | Well self-management from what they've told me and what they've taught me is to live as comfortably as you can with what you've got - with your disease you've got and don't buggerise around if you get crook [delay if you get sick]. That's it. <b>(P15)</b>                                                                                                                      |
|                       |                           |                                          | Recognising changes                    | You can feel yourself going down                                            | You're either on a high or you're low. You can feel yourself going down and I have a boost of prednisolone. I used to have 25 for three days, 12 and a half for three days, and then five for seven days. <b>(P1)</b>                                                                                                                                                                |

|                       |                              |                                   |                                             |                                                                                  |                                                                                                                                                                                                                                                                                                                                                                                                                                                                                                                                                                                                                                                                                                                                                                                                      |
|-----------------------|------------------------------|-----------------------------------|---------------------------------------------|----------------------------------------------------------------------------------|------------------------------------------------------------------------------------------------------------------------------------------------------------------------------------------------------------------------------------------------------------------------------------------------------------------------------------------------------------------------------------------------------------------------------------------------------------------------------------------------------------------------------------------------------------------------------------------------------------------------------------------------------------------------------------------------------------------------------------------------------------------------------------------------------|
| External Facilitators | Centrality of a known doctor | Continuity, trust, and connection | Central to support and coordination of care | Central position of support                                                      | He's (GP) my rock <b>(P9)</b><br>Well if (doctor) were to leave and go somewhere else I don't know what I'd do. <b>(P3)</b> .<br>'with different things she'd (GP) say 'I'll ring (doctor 1) and talk to her about it. So they worked hand in hand' <b>(P12)</b> .                                                                                                                                                                                                                                                                                                                                                                                                                                                                                                                                   |
|                       |                              |                                   | Providing access when needed                | Doctor integrated as part of community                                           | He happened to be one of my neighbours. He then asked 'how is Rufus (my dog) going? How are you going? He even said 'what's your wife doing? Your clothesline is chock-a-block every day'. Then he started talking, he says 'What is it?' I said, 'look mate, I'm not happy, I want to go home' <b>(P7)</b><br><br>He said to me, if ever I can't get in, tell them I've got to see him, yes. <b>(P9)</b><br>My GP is really good. I say to her, it's no good me making an appointment with you - I said this quite a while back - because I talk to the girls at the counter there and I've got to book in three months ahead. I said I'm not booking into you for three months ahead. I said I'll ring you and let you know when I'm free. When I'm free....She puts me in every time. <b>(P7)</b> |
|                       |                              |                                   | Converse impact of lack of access           | You couldn't get an appointment with her because she was booked out all the time | They only had the one lady doctor - and she'd been there forever apparently, highly regarded. So I got an appointment with her and she did all these tests on me and checked blood tests and everything. Found out that I was okay as such, and - but I could only access her every six weeks at the least. You could never get her if you were sick. Just because you were sick you couldn't get an appointment with her because she was booked out all the time <b>(P3)</b>                                                                                                                                                                                                                                                                                                                        |

1  
2  
3  
4  
5  
6  
7  
8  
9  
10  
11  
12  
13  
14  
15  
16  
17  
18  
19  
20  
21  
22  
23  
24  
25  
26  
27  
28  
29  
30  
31  
32  
33  
34  
35  
36  
37  
38  
39  
40  
41  
42  
43  
44  
45  
46

|  |                                    |                                          |                                                           |                                                                                                              |                                                                                                                                                                                                                                                                                                                                                                                                                                                                                                                                                                                                                                                                                                                                                                                                                                                                                                                                                                                                                                                                                                                                                               |
|--|------------------------------------|------------------------------------------|-----------------------------------------------------------|--------------------------------------------------------------------------------------------------------------|---------------------------------------------------------------------------------------------------------------------------------------------------------------------------------------------------------------------------------------------------------------------------------------------------------------------------------------------------------------------------------------------------------------------------------------------------------------------------------------------------------------------------------------------------------------------------------------------------------------------------------------------------------------------------------------------------------------------------------------------------------------------------------------------------------------------------------------------------------------------------------------------------------------------------------------------------------------------------------------------------------------------------------------------------------------------------------------------------------------------------------------------------------------|
|  | Health team going above and beyond | Patients supported with inclusive access | Going the extra mile to accommodate and care for patients | <p>Visiting and providing support</p> <p>Giving patients their private number</p> <p>Facilitating access</p> | <p>while I was in hospital (doctor 2) came in nearly every day and he didn't have to' <b>(P13)</b> (Doctor) came round to my place and sat down with my medications. She took them up to the chemist herself and got them put into a (Dosette-box). So I go to the chemist, now, and pick them up in a (Dosette Box). <b>(P8)</b></p> <p>We had to see her (doctor 1) before we went on holiday and she'd give us her mobile number and "if anything happens, call me straight away"<b>(P11)</b></p> <p>Well (wife) went overseas. (Doctor) said well what are you doing? I decided not to come ... I'm going to family. (Doctor) said okay, give the family my number. Here's some extra medication, and this is the instructions if something happens. <b>(P11)</b></p> <p>They let us (daughters of patient with COPD) sneak through the door around the other side, which brought us right in. Words cannot explain how great they were. We were so comfortable with all the staff that we could have asked them anything, every button they pressed on a machine, every tube they played with, they explained to us what they were doing <b>(P9)</b></p> |
|--|------------------------------------|------------------------------------------|-----------------------------------------------------------|--------------------------------------------------------------------------------------------------------------|---------------------------------------------------------------------------------------------------------------------------------------------------------------------------------------------------------------------------------------------------------------------------------------------------------------------------------------------------------------------------------------------------------------------------------------------------------------------------------------------------------------------------------------------------------------------------------------------------------------------------------------------------------------------------------------------------------------------------------------------------------------------------------------------------------------------------------------------------------------------------------------------------------------------------------------------------------------------------------------------------------------------------------------------------------------------------------------------------------------------------------------------------------------|

Rural COPD management

|                   |                  |                                                                                                 |                                                                                                                                                                                                                |                                                                                                                                                                                                                                                                                                                                       |                                                                                                                                                                                                                                                                                                                                                                                                                                                                                                                                                                                                                                                                                                                                                                                                                                                                                                                                                                                                                                                                                                                                                                                                                                                                                                                                                                                                                                                                                                                                                                                                                                                                                                                                                      |
|-------------------|------------------|-------------------------------------------------------------------------------------------------|----------------------------------------------------------------------------------------------------------------------------------------------------------------------------------------------------------------|---------------------------------------------------------------------------------------------------------------------------------------------------------------------------------------------------------------------------------------------------------------------------------------------------------------------------------------|------------------------------------------------------------------------------------------------------------------------------------------------------------------------------------------------------------------------------------------------------------------------------------------------------------------------------------------------------------------------------------------------------------------------------------------------------------------------------------------------------------------------------------------------------------------------------------------------------------------------------------------------------------------------------------------------------------------------------------------------------------------------------------------------------------------------------------------------------------------------------------------------------------------------------------------------------------------------------------------------------------------------------------------------------------------------------------------------------------------------------------------------------------------------------------------------------------------------------------------------------------------------------------------------------------------------------------------------------------------------------------------------------------------------------------------------------------------------------------------------------------------------------------------------------------------------------------------------------------------------------------------------------------------------------------------------------------------------------------------------------|
|                   | Social support   | <p>Community supports assisting with independence</p> <p>Family support</p> <p>Peer support</p> | <p>Community support independent living and watching over and taking care</p> <p>Family support with day to day and in recognising and managing symptoms</p> <p>Community through pulmonary rehabilitation</p> | <p>The bus drivers are great, they lift me up because I've got oxygen</p> <p>He Fell over in the garden one of them lifted him up</p> <p>Family provide care and support – day to day and in time of need</p> <p>Family assist with recognition of symptom changes</p> <p>We look after one another and talk nicely and beautiful</p> | <p>'When I go up the street on the bus, the bus drivers, they're great. They will lift me up on the thing, because I've got the oxygen, I can lift up and that. At the picture theatre I find, and everywhere I go actually, I find them very good' (P6)</p> <p>We get along very well with the maintenance fellows. (Patient with COPD) fell over in the garden out the side and one of the maintenance boys came up, lifted him up' (P5)</p> <p>The other night the power went off. So that's when you really need somebody ... you've got to go and get an oxygen bottle and set it up to breathe. (P6).</p> <p>Like at one stage what was about 12 of us in there with you (Mum, in Critical Care), (nurses) did not bat an eyelid. They (nurses) could see that the family support was what was keeping her going (daughter of participant 9). (She) helps me put my socks on, tells me to get out of bed. Tells me not to drink too much. General company. It's really what it is. (She) will pick very quickly if I'm tiring. You never say stop. Just one more thing. I get that a lot. So I'm running on the Plimsoll line all the time. Just one more thing, then we'll go home. (P11)</p> <p>Pulmonary rehabilitation also created an important community: Oh my goodness, (pulmonary rehabilitation) is amazing. See, number 1, you go there for exercises. Number 2- beautiful to sit there and talk to the next person. They all got similar things. We're talking about how someone feels shit. Somebody's better, somebody's worse. We just listen to one another and then naturally crack up a joke or something which they said laughter is better than medicine. We look after one another and talk nicely and beautiful.(P7)</p> |
| Internal Barriers | Loss of Identity | <p>Impact of restriction in social worth and contribution</p> <p>Impact on mental health</p>    | <p>Loss of social role</p> <p>Mental health distress over unrelenting condition</p>                                                                                                                            | <p>Forced by COPD into early retirement/ Loss of loved work role</p> <p>Living a life of suffering</p>                                                                                                                                                                                                                                | <p>I was that wrecked (by having to give up work due to COPD). It was unbelievable. I don't think that anybody would have loved their jobs as much I loved mine' (P8)</p> <p>'I thought, this is not worth it. What's the use in living when you suffer like this even though my mind is clear and everything?' (P7)</p> <p>Oh, my - if I could turn the clock back, every person that told me of the person and the people that were suffering from it, I would listen to the first person and shake the shit away, wouldn't touch it again. (P7)</p>                                                                                                                                                                                                                                                                                                                                                                                                                                                                                                                                                                                                                                                                                                                                                                                                                                                                                                                                                                                                                                                                                                                                                                                               |

|                   |                                        |                                        |                                                                                                                         |                                                                                                                                                                                                                                                                                       |                                                                                                                                                                                                                                                                                                                                                                                                                                                                                                                                                                                                                                                                                                                                                                                                                                                                                                                                                                                                                                                                                                                                                                                                                                                                                                                                                                                                                                                                          |
|-------------------|----------------------------------------|----------------------------------------|-------------------------------------------------------------------------------------------------------------------------|---------------------------------------------------------------------------------------------------------------------------------------------------------------------------------------------------------------------------------------------------------------------------------------|--------------------------------------------------------------------------------------------------------------------------------------------------------------------------------------------------------------------------------------------------------------------------------------------------------------------------------------------------------------------------------------------------------------------------------------------------------------------------------------------------------------------------------------------------------------------------------------------------------------------------------------------------------------------------------------------------------------------------------------------------------------------------------------------------------------------------------------------------------------------------------------------------------------------------------------------------------------------------------------------------------------------------------------------------------------------------------------------------------------------------------------------------------------------------------------------------------------------------------------------------------------------------------------------------------------------------------------------------------------------------------------------------------------------------------------------------------------------------|
| External Barriers | Lack of access and clear communication | Lack of access and clear communication | <p>High staff turnover</p> <p>Limited alternatives</p> <p>Lack of communication</p> <p>Having to repeatedly explain</p> | <p>Don't even get to know the GPs, 18 months and they're gone</p> <p>I could only access her every six weeks/ I've clashed, they've rang the ambulance and said go to hospital</p> <p>Don't they read the files?</p> <p>The next doctor comes in, you've got to explain it again.</p> | <p>You don't even get to know (the GPs), 18 months and they're gone (P14) But the new one didn't like (local town) so they left. He was replaced by an equally good one who didn't like (local town) and left. (P3).</p> <p>They only had the one lady doctor - and she'd been there forever apparently, highly regarded. ... but I could only access her every six weeks at the least. You could never get her if you were sick. <b>(P3)</b></p> <p>I've gone down to see a doctor, and I've clashed, or whatever. So they've rang an ambulance and said, go to hospital (P8)</p> <p>I was in hospital two weeks ago and it wasn't until a week after I got out with my GP that I actually found out what was the matter with me'. (P14)</p> <p>There's been a few times where I've gone to emergency. You explain the situation - like, you're having trouble breathing as it is. They're trying to say oh, how long have you been like this for? Have [they] got any medical records? You'll see what's the matter with me is! Do you know what I mean? ... and then the next doctor comes in for the next shift. Then they say oh, what are you here for? Talk to each other instead of having to ask the patients. <b>(P8)</b></p> <p>Then the next doctor comes in for the next shift. Then they say oh, what are you here for, and you've got to explain it. Don't you read the files? Talk to each other, instead of having to ask the patients. <b>(P8)</b></p> |
|-------------------|----------------------------------------|----------------------------------------|-------------------------------------------------------------------------------------------------------------------------|---------------------------------------------------------------------------------------------------------------------------------------------------------------------------------------------------------------------------------------------------------------------------------------|--------------------------------------------------------------------------------------------------------------------------------------------------------------------------------------------------------------------------------------------------------------------------------------------------------------------------------------------------------------------------------------------------------------------------------------------------------------------------------------------------------------------------------------------------------------------------------------------------------------------------------------------------------------------------------------------------------------------------------------------------------------------------------------------------------------------------------------------------------------------------------------------------------------------------------------------------------------------------------------------------------------------------------------------------------------------------------------------------------------------------------------------------------------------------------------------------------------------------------------------------------------------------------------------------------------------------------------------------------------------------------------------------------------------------------------------------------------------------|

|  |                                        |                    |                                                            |                                                                                                                                                                                                                |                                                                                                                                                                                                                                                                                                                                                                                                                                                                                                                                                                                                                                                                                                                                                                                                            |
|--|----------------------------------------|--------------------|------------------------------------------------------------|----------------------------------------------------------------------------------------------------------------------------------------------------------------------------------------------------------------|------------------------------------------------------------------------------------------------------------------------------------------------------------------------------------------------------------------------------------------------------------------------------------------------------------------------------------------------------------------------------------------------------------------------------------------------------------------------------------------------------------------------------------------------------------------------------------------------------------------------------------------------------------------------------------------------------------------------------------------------------------------------------------------------------------|
|  | Socio-cultural and economic challenges | Social isolation   | Impact of having newly moved to the region                 | <p>I didn't know anyone, you don't like to ask unless they offer</p> <p>Community clinic my only avenue because I didn't know what was available</p> <p>Need somebody who knew me, need care straight away</p> | <p>I wasn't (admitted to hospital), but I felt I should have been, because I wasn't coping. I wasn't well enough to do my own food preparation ... Because I'm fairly new and I'm not a local, I didn't know anyone so you don't like to be asking someone to do those sorts of things (shopping, food preparation) unless they offer <b>(P14)</b></p> <p>The community clinic was the one that I accessed because they HAD TO take new patients. I mean they had more than they could cope with I think, but that was my only avenue at the time because I didn't know what was available ... I needed to access somebody who knew me- because asthma doesn't go by the record sort of thing. You don't know when- and when you get sick, you're sick enough to need care straight away. <b>(P14)</b></p> |
|  |                                        | Financial hardship | Making choices about costs associated with chronic disease | <p>It's just another cost</p> <p>If we lived in housing commission you would be subsidised</p>                                                                                                                 | <p>Financial impact was raised several times, with participants having to balance treatments choices as well as resource choices to stay well: 'We chose to increase the temperature of the house by a few degrees. It's just another cost'.<b>(P11)</b></p> <p>Requirements to replace stoves for oxygen therapy safety was another common added burden, and support for such measures perceived to be influenced by social circumstance: 'If you were living in Housing Commission you would be subsidised, but because we were (self-funded retirees) ... nothing'.<b>(P6)</b></p>                                                                                                                                                                                                                      |

COPD: Chronic obstructive pulmonary disease

GP: General Practitioner

P: Participant

1  
2  
3  
4  
5  
6  
7  
8  
9  
10  
11  
12  
13  
14  
15  
16  
17  
18  
19  
20  
21  
22  
23  
24  
25  
26  
27  
28  
29  
30  
31  
32  
33  
34  
35  
36  
37  
38  
39  
40  
41  
42  
43  
44  
45  
46



1  
2  
3  
4  
5  
6  
7  
8  
9  
10  
11  
12  
13  
14  
15  
16  
17  
18  
19  
20  
21  
22  
23  
24  
25  
26  
27  
28  
29  
30  
31  
32  
33  
34  
35  
36  
37  
38  
39  
40  
41  
42  
43  
44  
45  
46  
47  
48  
49  
50  
51  
52  
53  
54  
55  
56  
57  
58  
59  
60

For peer review only

## REFERENCES

1. Fromer L. Implementing chronic care for COPD: planned visits, care coordination, and patient empowerment for improved outcomes. *Int J Chron Obstruct Pulmon Dis*. 2011;6:605-14.
2. Adeloje D, Chua S, Lee C, Basquill C, Papan A, Theodoratou E, et al. Global and regional estimates of COPD prevalence: Systematic review and meta-analysis. *Journal of global health*. 2015;5(2):020415.
3. Murray CJ, Atkinson C, Bhalla K, Birbeck G, Burstein R, Chou D, et al. The state of US health, 1990-2010: burden of diseases, injuries, and risk factors. *Jama*. 2013;310(6):591-608.
4. Fletcher M, Upton J, Taylor-Fishwick J, Buist S, Jenkins C, Hutton J, et al. COPD uncovered: an international survey on the impact of chronic obstructive pulmonary disease [COPD] on a working age population. *BMC Public Health*. 2011;11(1):612.
5. Murray SA, Kendall M, Boyd K, Sheikh A. Illness trajectories and palliative care. *Bmj*. 2005;330(7498):1007-11.
6. Rabe KF, Hurd S, Anzueto A, Barnes PJ, Buist SA, Calverley P, et al. Global strategy for the diagnosis, management, and prevention of chronic obstructive pulmonary disease: GOLD executive summary. *American journal of respiratory and critical care medicine*. 2007;176(6):532-55.
7. Hillas G, Perlikos F, Tsiligianni I, Tzanakis N. Managing comorbidities in COPD. *International Journal of Chronic Obstructive Pulmonary Disease*. 2015;10:95-109.
8. Hillas G, Perlikos F, Tsiligianni I, Tzanakis N. Managing comorbidities in COPD. *Int J Chron Obstruct Pulmon Dis*. 2015;10:95-109.
9. Williams V, Hardinge M, Ryan S, Farmer A. Patients' experience of identifying and managing exacerbations in COPD: a qualitative study. *NPJ primary care respiratory medicine*. 2014;24:14062.
10. Bucknall CE, Miller G, Lloyd SM, Cleland J, McCluskey S, Cotton M, et al. Glasgow supported self-management trial (GSuST) for patients with moderate to severe COPD: randomised controlled trial. *BMJ*. 2012;344.
11. Benzo RP, Abascal-Bolado B, Duloherly MM. Self-management and quality of life in chronic obstructive pulmonary disease (COPD): The mediating effects of positive affect. *Patient education and counseling*. 2016;99(4):617-23.
12. Hopley M, Horsburgh M, Peri K. Barriers to accessing specialist care for older people with chronic obstructive pulmonary disease in rural New Zealand. *Journal of primary health care*. 2009;1(3):207-14.
13. Jackson K, Oelke ND, Besner J, Harrison A. Patient journey: implications for improving and integrating care for older adults with chronic obstructive pulmonary disease. *Canadian journal on aging = La revue canadienne du vieillissement*. 2012;31(2):223-33.
14. Swanson E.J., Rice K.L., Rector T.S., Westanmo A.D., Duane P.G. Quality of Chronic Obstructive Pulmonary Disease-Related Health Care in Rural and Urban Veterans Affairs Clinics. *Federal Practitioner*. 2017:27-32.
15. Goodridge D, Hutchinson S, Wilson D, Ross C. Living in a rural area with advanced chronic respiratory illness: a qualitative study. *Primary care respiratory journal : journal of the General Practice Airways Group*. 2011;20(1):54-8.
16. Lockett T, Phillips J, Johnson M, Garcia M, Bhattarai P, Carrieri-Kohlman V, et al. Insights from Australians with respiratory disease living in the community with experience of self-managing through an emergency department 'near miss' for breathlessness: a strengths-based qualitative study. 2017;7(12):e017536.
17. Halting A-G, Wahl A, Heggdal K. 'Belonging'. 'Patients' experiences of social relationships during pulmonary rehabilitation. *Disability and Rehabilitation*. 2010;32(15):1272-80.
18. Disler RT, Green A, Lockett T, Newton PJ, Currow D, Davidson PM. Experience of Advanced Chronic Obstructive Pulmonary Disease: Metasynthesis of Qualitative Research. *Journal of pain and symptom management*. 2014.
19. Ziersch AM, Baum F, Darmawan IGN, Kavanagh AM, Bentley RJ. Social capital and health in

- 1  
2  
3 rural and urban communities in South Australia. *Australian and New Zealand journal of public health*.  
4 2009;33(1):7-16.
- 5 20. Manderson L. Social capital and inclusion: Locating wellbeing in community. *Australian*  
6 *Cultural History*. 2010;28(2-3):233-52.
- 7 21. Brundisini F, Giacomini M, DeJean D, Vanstone M, Winsor S, Smith A. Chronic disease  
8 patients' experiences with accessing health care in rural and remote areas: a systematic review and  
9 qualitative meta-synthesis. *Ontario health technology assessment series*. 2013;13(15):1-33.
- 10 22. Tong A, Sainsbury P, Craig J. Consolidated criteria for reporting qualitative research (COREQ):  
11 a 32-item checklist for interviews and focus groups. *International journal for quality in health care*.  
12 2007;19(6):349-57.
- 13 23. Braun V, Clarke V. Using thematic analysis in psychology. *Qualitative research in psychology*.  
14 2006;3(2):77-101.
- 15 24. Thomas J, Harden A. Methods for the thematic synthesis of qualitative research in  
16 systematic reviews. *BMC Medical Research Methodology*.  
17 2008;8:<http://www.biomedcentral.com/content/pdf/1471-2288-8-45.pdf>.
- 18 25. Creswell JW. *Research Design: Qualitative, Quantitative, and Mixed Methods Approaches*.  
19 3rd ed. London: Sage; 2009.
- 20 26. Davidson PM, Halcomb E, Gholizadeh L. Focus groups in health research and nursing. In:  
21 Liamputtong P, editor. *Research methods in health: Foundations for evidence-based practice*: Oxford  
22 University Press, Australia & New Zealand; 2013. p. 54-71.
- 23 27. Kerr C, Nixon A, Wild D. Assessing and demonstrating data saturation in qualitative inquiry  
24 supporting patient-reported outcomes research. *Expert review of pharmacoeconomics & outcomes*  
25 *research*. 2010;10(3):269-81.
- 26 28. Gysels M, Higginson I. Self-management for breathlessness in COPD: the role of pulmonary  
27 rehabilitation. *Chronic respiratory disease*. 2009;6(3):133-40.
- 28 29. Trivedi RB, Bryson CL, Udriș E, Au DH. The influence of informal caregivers on adherence in  
29 COPD patients. *Annals of Behavioral Medicine*. 2012;44(1):66-72.
- 30 30. Wakabayashi R, Motegi T, Yamada K, Ishii T, Gemma A, Kida K. Presence of in-home  
31 caregiver and health outcomes of older adults with chronic obstructive pulmonary disease. *Journal*  
32 *of the American Geriatrics Society*. 2011;59(1):44-9.
- 33 31. Disler RT, Gallagher RD, Davidson PM. Factors influencing self-management in chronic  
34 obstructive pulmonary disease: an integrative review *International Journal of Nursing Studies*.  
35 2012;49:230-42.
- 36 32. Gardener AC, Ewing G, Kuhn I, Farquhar M. Support needs of patients with COPD: a  
37 systematic literature search and narrative review. *International journal of chronic obstructive*  
38 *pulmonary disease*. 2018;13:1021.
- 39 33. Shipman C, White S, Gysels M, White P. Access to care in advanced COPD: factors that  
40 influence contact with general practice services. *Primary care respiratory journal : journal of the*  
41 *General Practice Airways Group*. 2009;18(4):273-8.
- 42 34. Waibel S, Vargas I, Aller MB, Gusmao R, Henao D, Vazquez ML. The performance of  
43 integrated health care networks in continuity of care: a qualitative multiple case study of COPD  
44 patients. *International journal of integrated care*. 2015;15:e029.
- 45 35. Kaptein AA, Fischer MJ, Scharloo M. Self-management in patients with COPD: theoretical  
46 context, content, outcomes, and integration into clinical care. *Int J Chron Obstruct Pulmon Dis*.  
47 2014;9:907-17.
- 48 36. Bourke L, Taylor J, Humphreys JS, Wakerman J. "Rural health is subjective, everyone sees it  
49 differently": understandings of rural health among Australian stakeholders. *Health & place*.  
50 2013;24:65-72.
- 51 37. Barton C, Effing TW, Cafarella P. Social support and social networks in COPD: A scoping  
52 review. *COPD: Journal of Chronic Obstructive Pulmonary Disease*. 2015;12(6):690-702.
- 53 38. Russell S, Ogunbayo OJ, Newham JJ, Heslop-Marshall K, Netts P, Hanratty B, et al. Qualitative  
54  
55  
56  
57  
58  
59  
60

1  
2  
3 systematic review of barriers and facilitators to self-management of chronic obstructive pulmonary  
4 disease: views of patients and healthcare professionals. NPJ primary care respiratory medicine.  
5 2018;28(1):2-  
6  
7  
8  
9  
10  
11  
12  
13  
14  
15  
16  
17  
18  
19  
20  
21  
22  
23  
24  
25  
26  
27  
28  
29  
30  
31  
32  
33  
34  
35  
36  
37  
38  
39  
40  
41  
42  
43  
44  
45  
46  
47  
48  
49  
50  
51  
52  
53  
54  
55  
56  
57  
58  
59  
60

For peer review only

1  
2  
3 Figure captions:  
4

5 **Figure 1: Facilitators and barriers to COPD self-management in the rural context. Adaptation to the**  
6  
7 **‘new normal’ of life with COPD and ability to self-manage were influenced by facilitators and**  
8 **barriers, moderated by inclusion (2 column figure).**  
9  
10  
11  
12  
13  
14  
15  
16  
17  
18  
19  
20  
21  
22  
23  
24  
25  
26  
27  
28  
29  
30  
31  
32  
33  
34  
35  
36  
37  
38  
39  
40  
41  
42  
43  
44  
45  
46  
47  
48  
49  
50  
51  
52  
53  
54  
55  
56  
57  
58  
59  
60

For peer review only

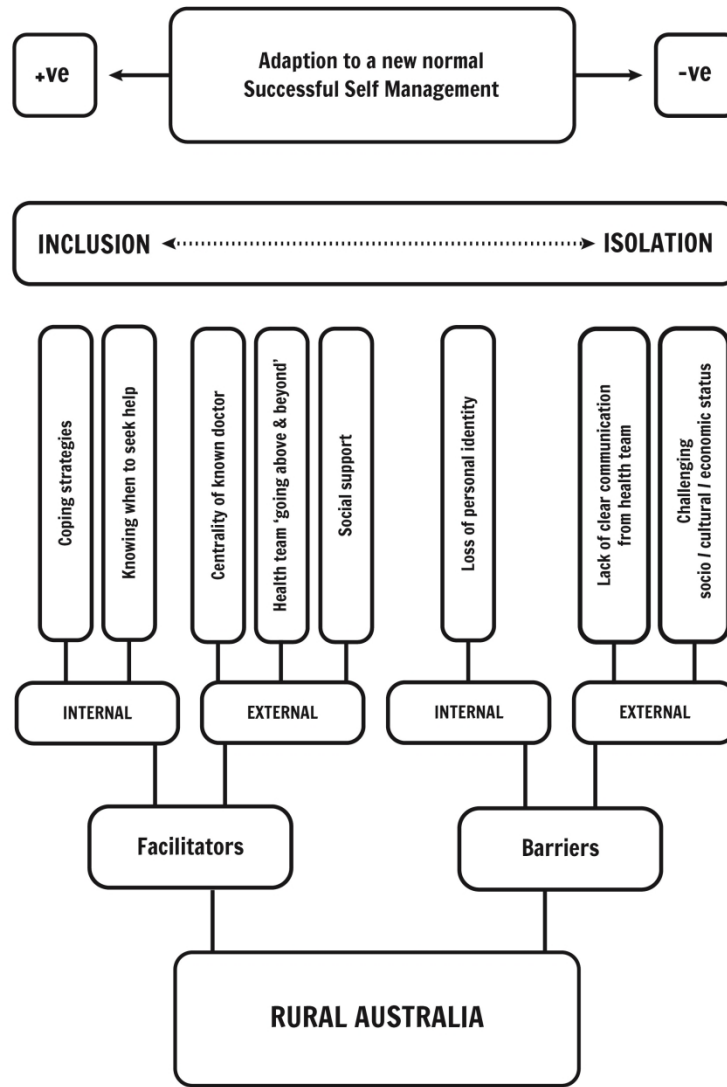

Figure 1: Facilitators and barriers to COPD self-management in the rural context. Adaptation to the 'new normal' of life with COPD and ability to self-manage were influenced by facilitators and barriers, moderated by inclusion.

210x297mm (300 x 300 DPI)

**APPENDIX I INTERVIEW SCHEDULE**

1. Overall, what has your experience of having COPD been like?
2. Can you tell me a little about how and when your illness started and how that led to a diagnosis?  
Can you describe your initial thoughts to being diagnosed?
3. Have you received information about your condition?
4. What sorts of things do you do because of your condition (diet, exercise, use of health services)?
5. What types of support are you currently receiving?
6. How do you feel in yourself nowadays compared to before your diagnosis? How your life is going with your COPD?
7. How has your condition impacted on you financially?
8. How do you feel in yourself nowadays?
9. How has your illness affected your social life, relationships with friends and family?

32 item COREQ checklist, as per Tong, Sainsbury & Craig, 2007:

|                                |                                          |                                                                                                                                                  |        |
|--------------------------------|------------------------------------------|--------------------------------------------------------------------------------------------------------------------------------------------------|--------|
| 1.                             | Interviewer/facilitator                  | Which author/s conducted the interview or focus group?                                                                                           | Page 6 |
| 2.                             | Credentials                              | What were the researcher's credentials? <i>E.g. PhD, MD</i>                                                                                      | Page 6 |
| 3.                             | Occupation                               | What was their occupation at the time of the study?                                                                                              | Page 1 |
| 4.                             | Gender                                   | Was the researcher male or female?                                                                                                               | Page 6 |
| 5.                             | Experience and training                  | What experience or training did the researcher have?                                                                                             | Page 6 |
| Relationship with participants |                                          |                                                                                                                                                  |        |
| 6.                             | Relationship established                 | Was a relationship established prior to study commencement?                                                                                      | Page 6 |
| 7.                             | Participant knowledge of the interviewer | What did the participants know about the researcher? <i>e.g. personal goals, reasons for doing the research</i>                                  | Page 6 |
| 8.                             | Interviewer characteristics              | What characteristics were reported about the interviewer/facilitator? <i>e.g. Bias, assumptions, reasons and interests in the research topic</i> | Page 6 |
| <b>Domain 2: study design</b>  |                                          |                                                                                                                                                  |        |



1  
2  
3  
4  
5  
6  
7  
8  
9  
10  
11  
12  
13  
14  
15  
16  
17  
18  
19  
20  
21  
22  
23  
24  
25  
26  
27  
28  
29  
30  
31  
32  
33  
34  
35  
36  
37  
38  
39  
40  
41  
42  
43  
44  
45  
46Theoretical  
framework

|    |                                       |                                                                                                                                                                 |        |
|----|---------------------------------------|-----------------------------------------------------------------------------------------------------------------------------------------------------------------|--------|
| 9. | Methodological orientation and Theory | What methodological orientation was stated to underpin the study? <i>e.g. grounded theory, discourse analysis, ethnography, phenomenology, content analysis</i> | Page 5 |
|----|---------------------------------------|-----------------------------------------------------------------------------------------------------------------------------------------------------------------|--------|

## Participant selection

|     |          |                                                                                           |        |
|-----|----------|-------------------------------------------------------------------------------------------|--------|
| 10. | Sampling | How were participants selected? <i>e.g. purposive, convenience, consecutive, snowball</i> | Page 5 |
|-----|----------|-------------------------------------------------------------------------------------------|--------|

|     |                    |                                                                                    |        |
|-----|--------------------|------------------------------------------------------------------------------------|--------|
| 11. | Method of approach | How were participants approached? <i>e.g. face-to-face, telephone, mail, email</i> | Page 5 |
|-----|--------------------|------------------------------------------------------------------------------------|--------|

|     |             |                                          |        |
|-----|-------------|------------------------------------------|--------|
| 12. | Sample size | How many participants were in the study? | Page 7 |
|-----|-------------|------------------------------------------|--------|

|     |                   |                                                                 |        |
|-----|-------------------|-----------------------------------------------------------------|--------|
| 13. | Non-participation | How many people refused to participate or dropped out? Reasons? | Page 7 |
|-----|-------------------|-----------------------------------------------------------------|--------|

## Setting

|     |                            |                                                                   |        |
|-----|----------------------------|-------------------------------------------------------------------|--------|
| 14. | Setting of data collection | Where was the data collected? <i>e.g. home, clinic, workplace</i> | Page 6 |
|-----|----------------------------|-------------------------------------------------------------------|--------|

|     |                              |                                                                   |        |
|-----|------------------------------|-------------------------------------------------------------------|--------|
| 15. | Presence of non-participants | Was anyone else present besides the participants and researchers? | Page 7 |
|-----|------------------------------|-------------------------------------------------------------------|--------|

|     |                       |                                                                                          |          |
|-----|-----------------------|------------------------------------------------------------------------------------------|----------|
| 16. | Description of sample | What are the important characteristics of the sample? <i>e.g. demographic data, date</i> | Page 6-7 |
|-----|-----------------------|------------------------------------------------------------------------------------------|----------|

## Data collection

|     |                        |                                                                               |            |
|-----|------------------------|-------------------------------------------------------------------------------|------------|
| 17. | Interview guide        | Were questions, prompts, guides provided by the authors? Was it pilot tested? | Appendix 1 |
| 18. | Repeat interviews      | Were repeat interviews carried out? If yes, how many?                         | NA         |
| 19. | Audio/visual recording | Did the research use audio or visual recording to collect the data?           | Page 6     |
| 20. | Field notes            | Were field notes made during and/or after the interview or focus group?       | NA         |
| 21. | Duration               | What was the duration of the interviews or focus group?                       | Page 7     |
| 22. | Data saturation        | Was data saturation discussed?                                                | Page 6     |
| 23. | Transcripts returned   | Were transcripts returned to participants for comment and/or correction?      | Page 7     |

**Domain 3: analysis and findingsz**

## Data analysis

|     |                       |                                      |        |
|-----|-----------------------|--------------------------------------|--------|
| 24. | Number of data coders | How many data coders coded the data? | Page 6 |
|-----|-----------------------|--------------------------------------|--------|

1  
2  
3  
4  
5  
6  
7  
8  
9  
10  
11  
12  
13  
14  
15  
16  
17  
18  
19  
20  
21  
22  
23  
24  
25  
26  
27  
28  
29  
30  
31  
32  
33  
34  
35  
36  
37  
38  
39  
40  
41  
42  
43  
44  
45  
46

|           |                                |                                                                                                                                          |                      |
|-----------|--------------------------------|------------------------------------------------------------------------------------------------------------------------------------------|----------------------|
| 25.       | Description of the coding tree | Did authors provide a description of the coding tree?                                                                                    | NA                   |
| 26.       | Derivation of themes           | Were themes identified in advance or derived from the data?                                                                              | Page 6               |
| 27.       | Software                       | What software, if applicable, was used to manage the data?                                                                               | Page 6               |
| 28.       | Participant checking           | Did participants provide feedback on the findings?                                                                                       | Page 7               |
| Reporting |                                |                                                                                                                                          |                      |
| 29.       | Quotations presented           | Were participant quotations presented to illustrate the themes / findings? Was each quotation identified? e.g. <i>participant number</i> | Table 1 & pages 8-12 |
| 30.       | Data and findings consistent   | Was there consistency between the data presented and the findings?                                                                       | Page 6               |
| 31.       | Clarity of major themes        | Were major themes clearly presented in the findings?                                                                                     | Figure 1             |
| 32.       | Clarity of minor themes        | Is there a description of diverse cases or discussion of minor themes?                                                                   | Pages 8-12           |

# BMJ Open

## The benefits of the 'village': a qualitative exploration of the patient experience of COPD in rural Australia

|                                 |                                                                                                                                                                                                                                                                                |
|---------------------------------|--------------------------------------------------------------------------------------------------------------------------------------------------------------------------------------------------------------------------------------------------------------------------------|
| Journal:                        | <i>BMJ Open</i>                                                                                                                                                                                                                                                                |
| Manuscript ID                   | bmjopen-2019-030953.R1                                                                                                                                                                                                                                                         |
| Article Type:                   | Original research                                                                                                                                                                                                                                                              |
| Date Submitted by the Author:   | 23-Jul-2019                                                                                                                                                                                                                                                                    |
| Complete List of Authors:       | Glenister, Kristen; University of Melbourne Faculty of Science, Department of Rural Health<br>Haines, Helen; University of Melbourne Faculty of Science, Department of Rural Health<br>Disler, Rebecca; University of Melbourne Faculty of Science, Department of Rural Health |
| <b>Primary Subject Heading</b>: | Respiratory medicine                                                                                                                                                                                                                                                           |
| Secondary Subject Heading:      | Patient-centred medicine                                                                                                                                                                                                                                                       |
| Keywords:                       | Chronic airways disease < THORACIC MEDICINE, PRIMARY CARE, QUALITATIVE RESEARCH                                                                                                                                                                                                |
|                                 |                                                                                                                                                                                                                                                                                |

SCHOLARONE™  
Manuscripts

1  
2  
3 1 **TITLE:** The benefits of the ‘village’: a qualitative exploration of the patient experience of  
4  
5  
6 2 COPD in rural Australia

7  
8 3 **Running title: COPD management in a rural setting**  
9

10 4  
11  
12 5 **Authors**

13  
14 6 Glenister, Kristen<sup>a</sup>, Haines, Helen<sup>a</sup>, Disler, Rebecca<sup>a</sup>  
15

16 7 **Affiliations**

17  
18 8 a. Department of Rural Health, Faculty of Medicine, Dentistry and Health  
19  
20 9 Sciences | University of Melbourne  
21

22  
23 10 Corresponding Author:

24  
25 11 Dr Kristen Glenister

26  
27 12 Research Fellow, Rural Chronic Ill Health

28  
29 13 Department of Rural Health

30  
31 14 ‘The Chalet’

32  
33 15 Docker Street, Wangaratta, 3677.

34  
35 16 Australia

36  
37 17 +61 3 5823 4532

38  
39 18 [kristen.glenister@unimelb.edu.au](mailto:kristen.glenister@unimelb.edu.au)

40  
41 19 Twitter: [@kristenglenist1](https://twitter.com/kristenglenist1), [@HelenHaines1](https://twitter.com/HelenHaines1), [@RebeccaDisler](https://twitter.com/RebeccaDisler)  
42  
43  
44 20

45  
46 21 **Author contributions:** (1) the conception and design of the study, or acquisition of data, or  
47  
48 22 analysis and interpretation of data: KG, HH, RD, (2) drafting the article or revising it critically  
49  
50 23 for important intellectual content: KG, HH, RD, (3) final approval of the version to be submitted:  
51  
52 24 KG, HH, RD.  
53

54 25  
55 26  
56  
57  
58  
59  
60

27 **ABSTRACT**

28 **TITLE:** The benefits of the 'village': a qualitative exploration of the patient experience of COPD  
29 in rural Australia

30 **Objectives:** This study sought to explore patients' experiences of living with, and adapting to, COPD in  
31 the rural context. Specifically, our research question was 'What are the barriers and facilitators to  
32 living with and adapting to COPD in rural Australia?'

33 **Design:** Qualitative, semi-structured interviews. Conversations were recorded, transcribed verbatim  
34 and analysed using thematic analysis following the consolidated criteria for reporting qualitative  
35 research (COREQ) guidelines.

36 **Setting:** Patients with COPD, admitted to a sub-regional hospital in Australia were invited to  
37 participate in interviews between October and November 2016.

38 **Main outcome measures:** Themes were identified that assisted with understanding of the barriers  
39 and facilitators to living with, and adapting to, COPD in the rural context.

40 **Results:** Four groups of themes emerged: *Internal Facilitators* (coping strategies; knowledge of when  
41 to seek help) and *External Facilitators* (centrality of a known doctor; health team 'going above and  
42 beyond'; and social supports) and *Internal/External Barriers to COPD self-management* (loss of identity,  
43 lack of access and clear communication, socio-cultural challenges), that were moderated by feelings  
44 of inclusion or isolation in the rural community or 'village'.

45 **Conclusions:** Our findings suggest that community inclusion enhances patients' ability to cope and  
46 ultimately self-manage COPD. This is facilitated by living in a supportive 'village' environment, and  
47 included a central, known doctor and a healthcare team willing to go 'above and beyond'.  
48 Understanding, or supplementing, these social networks within the broader social structure may assist  
49 people to manage chronic disease, regardless of rural or metropolitan location.

50 **Key words (4-10):** Chronic obstructive pulmonary disease; general practice; rural; self-management;  
51 qualitative.

1  
2  
3 52 **Strengths and Limitations:**  
4

- 5 53 • This study provides important insights into the rural healthcare experience and an exploration  
6  
7 of medical, social and emotional supports from the patient's perspective.  
8 54  
9  
10 55 • Our findings suggest that community inclusion, facilitated through a supportive 'village'  
11  
12 enhance patients' ability to cope and ultimately self-manage COPD.  
13 56  
14 57 • These findings, although based on rural data, are likely highly relevant to other settings,  
15  
16 including urban areas, and could be used to model social supports for those living with COPD  
17 58  
18 59 • This study utilised qualitative methodology to provide an in depth exploration of the patient  
19  
20 experience.  
21 60  
22  
23 61 • This study was undertaken at a single site with a sample of people who had been hospitalised  
24  
25 with COPD in the preceding 12 months and is therefore unlikely to be representative of all  
26 62  
27 rural patients with COPD.  
28 63  
29  
30 64  
31  
32 65  
33  
34 66  
35  
36  
37  
38  
39  
40  
41  
42  
43  
44  
45  
46  
47  
48  
49  
50  
51  
52  
53  
54  
55  
56  
57  
58  
59  
60

## 67 INTRODUCTION

68 Chronic obstructive pulmonary disease (COPD) is a chronic condition characterised by non-reversible  
69 airways obstruction, cough, phlegm and dyspnoea.(1) COPD is the fourth leading cause of death  
70 globally.(2, 3) Social costs include significant disability, poor physical functioning, social isolation and  
71 caregiver burden.(4) Disease trajectory involves progressive deterioration of lung function, decreasing  
72 quality of life, and increasing acute exacerbation frequency and hospitalisation.(5, 6) Management of  
73 COPD is complex and patients often live with multiple comorbid conditions and may have poor mental  
74 health.(7, 8) Optimal care of COPD is founded on seamless, integrated, patient-centred care delivered  
75 by a multidisciplinary team with an emphasis on self-management.(9) Engagement with self-  
76 management is associated with decreased hospital readmission (10) and increased quality of life.(11)  
77 However, research suggests that less than half of patients with COPD will achieve effective self-  
78 management, with younger patients and those living with others more able to address the complex  
79 disease management requirements.(10) Early access to specialist care enhances support for  
80 coordination and self-management of COPD in primary care,(12) with good relationships with health  
81 professionals facilitating navigation through the health system and a positive perception of quality of  
82 health care.(13)

83  
84 In the rural context, workforce constraints restrict access to multidisciplinary, specialist providers,  
85 with care more likely to be delivered by smaller, more generalist teams. A qualitative study in New  
86 Zealand found that care pathways for COPD care in rural contexts were unclear and poorly  
87 coordinated.(12) A recent study in the United States found that although access to diagnostic testing  
88 and specialists was restricted in rural clinics, quality and patterns of healthcare were similar for COPD  
89 between urban and rural clinics.(14) In a rural Canadian study, long-term relationships with general  
90 practitioners, community support and personalised care helped to overcome issues of restricted  
91 specialist access in COPD care.(15) In the Australian context, a study found that self-monitoring of  
92 symptoms and support from health professionals assisted patients to manage breathing difficulties



1  
2  
3 93 and avoid emergency department presentations.(16) Social inclusion and a sense of belonging in COPD  
4  
5 94 has been shown to influence a person's experience of living with COPD (17, 18). The idea of a social  
6  
7 95 connectedness through a supportive 'village' has been used to describe a diversity of social networks  
8  
9 96 and supports in contexts such as maternal and child health (19) and more recently in healthy ageing  
10  
11 97 through the 'aging-in-place' movement (20, 21). While the 'village' concept has not been used to  
12  
13 98 describe supports in COPD, there is a clear recognition of the benefit of a sense of belonging and the  
14  
15 99 importance of social support, from a variety of sources, in this context (17, 18). What is not well  
16  
17 100 understood is the experience of living with COPD and social connectedness in the rural context.  
18  
19 101 Literature has pointed to a high degree of social capital within rural communities and inclusion of  
20  
21 102 those who belong within social networks,(22) with the converse for those who do not experience this  
22  
23 103 inclusion.(23) Following, a review of qualitative research into chronic disease management in rural  
24  
25 104 areas across North America, Europe, Australia and New Zealand found that the rural environment  
26  
27 105 offered several positive aspects, namely personalised care, clinicians being better positioned to  
28  
29 106 provide patient centred care and increased community belonging which could counteract vulnerability.  
30  
31 107 (24)  
32  
33 108  
34  
35  
36  
37  
38  
39 109 Rural studies focussed on the experience of COPD from a patient's perspective are uncommon. This  
40  
41 110 study has sought to explore patient perspectives of living with and adapting to COPD in the rural  
42  
43 111 Australian context. Understanding patient perspectives on current barriers and facilitators will inform  
44  
45 112 rural workforce and care structure planning.  
46  
47  
48  
49

## 114 **Methods:**

### 116 **Design**

117 Qualitative study using semi-structured interviews following the Consolidated criteria for reporting  
118 qualitative research (COREQ) guidelines.(25) Thematic analysis was chosen as it allowed for synthesis

1  
2  
3 119 focused on a phenomenon of interest;(26) this being the experience of living with and adapting to  
4  
5 120 COPD in the rural context. Thematic analysis is also is a transparent method that actively seeks to  
6  
7 121 remain close to the primary data and avoids over analysis.(27)  
8  
9

10 122

### 12 123 **Sample and setting**

14 124 A convenience sample of patients admitted to a sub-regional Australian hospital (Northeast Health  
15  
16 125 Wangaratta) with a primary diagnosis of COPD in the preceding twelve months. Data on disease  
17  
18 126 severity was not collected, however all participants had required an acute admission for their COPD  
19  
20 127 in the previous 12 months. In this setting, people with COPD are typically managed by General  
21  
22 128 Practitioners, with or without a Generalist Physician, and some are supported by community allied  
23  
24 129 health services including physiotherapy, occupational therapy and social work in a pulmonary  
25  
26 130 rehabilitation programme. Northeast Health Wangaratta is an approximately 200 bed public hospital  
27  
28 131 that services a catchment of 90 000 people. Approximately four General/Consultant Physicians work  
29  
30 132 in the two larger townships in the catchment (Wangaratta and Benalla) along with 1.2 GPs per 1000  
31  
32 133 population, which is equivalent to the state average. (28, 29)  
33  
34  
35  
36

37 134

### 39 135 **Data collection**

41 136 Semi-structured questions were developed in consultation with experts in the field of chronic illness  
42  
43 137 and community health care. The questions sought to explore experiences of care coordination and  
44  
45 138 living with COPD in the rural context, and are listed as Appendix 1. Potential participants were sent an  
46  
47 139 invitation letter by the hospital following discharge. Interviews undertaken at a location chosen by the  
48  
49 140 participant. The female interviewer (KG, PhD ) had training in interviewing techniques and experience  
50  
51 141 in chronic disease management and health care delivery research. The interviewer had no prior or  
52  
53 142 ongoing relationship with the participants. Interviews were audio-recorded and transcribed verbatim.  
54  
55 143 Names of people and pets were changed to increase anonymity of participants. No additional data is  
56  
57 144 available.  
58  
59  
60

### 145 **Data analysis**

146 Thematic synthesis was completed in three stages by two or more authors. (27, 30, 31) All data were  
147 entered into NVivo11 QSR®, followed by line-by-line free coding of primary data (Stage 1) (two  
148 researchers). Free codes were then organised into descriptive themes (Stage 2), with confirmation of  
149 themes through discussion (two researchers).(27, 30, 31) Random selection of data extracts by a third  
150 independent researchers ensured trustworthiness of the data coding and themes, with disagreements  
151 resolved through discussion.(27, 30, 31) Lastly, central emergent analytical themes were developed  
152 through group discussion (Stage 3) to provide a broader understanding and meaning to the data within  
153 the context of patient's experiences of care coordination and living with COPD in the rural Australian  
154 context (three researchers).(27, 30, 31) Transparency of method, the use of independent investigators,  
155 and group discussion were used to promote the validity of findings, rigor and trustworthiness of the  
156 synthesis process.(27, 30, 31) Reflection was actively sought through discussion to minimise bias and  
157 come to agreement as to data saturation.(32) The final themes, with quotes for illustrative purposes  
158 are summarised in table 1.

### 160 **Ethics approval**

161 Ethics approval was granted by the Northeast Health Wangaratta Human Research Ethics Committee  
162 (project 175, August 2016). Signed, informed consent was obtained from each interviewee.

### 164 **Patient and Public Involvement statement**

165 This research involved patient interviews. Patients were not invited to comment on the study design  
166 and were not consulted to develop patient relevant outcomes or interpret the results. Patients were  
167 not invited to contribute to the writing or editing of this document for readability or accuracy. We will  
168 disseminate results to study participants.

1  
2  
3 171 **Transparency declaration:**  
4

5 172 The lead author affirms that this manuscript is an honest, accurate and transparent account of the  
6  
7 173 study being reported and that no important aspects of the study have been omitted, and that any  
8  
9 174 discrepancies from the study have been explained.  
10  
11

12 175

13  
14 176 **RESULTS**  
15

16 177 Fourteen people with COPD consented to participate, along with a family member if they desired. No  
17  
18 178 participants dropped out of the study. Interviews were undertaken between October and November  
19  
20 179 2016, with a duration of 19 to 77 minutes.  
21  
22

23 180

24  
25 181 **Facilitators and barriers to COPD self-management in the rural context**  
26

27 182 Thematic analysis resulted in four groups of themes that influenced whether a person with COPD was  
28  
29 183 able to adapt to and ultimately self-manage their condition in the rural context, including: *Internal*  
30  
31 184 *Facilitators* (coping strategies; knowledge of when to seek help), *External Facilitators* (centrality of a  
32  
33 185 known doctor; health team 'going above and beyond'; and social supports), *Internal Barriers* (loss of  
34  
35 186 identity) and *External Barriers* (lack of access and clear communication, socio-cultural challenges).  
36  
37 187 These themes were furthermore moderated by feelings of 'inclusion' (feeling welcomed in the  
38  
39 188 community) or 'isolation' (feeling emotionally separate from others in the community) within the rural  
40  
41 189 context. These findings are summarised in Figure 1. Ability to adapt to the 'new normal' of life with  
42  
43 190 COPD and self-manage COPD could be considered as a spectrum from positive (adaptation to the new  
44  
45 191 normal with effective self-management) to negative (inability to adapt or self-manage).  
46  
47  
48  
49

50 192

51  
52  
53 193 **Internal Facilitators to COPD self-management**  
54  
55  
56  
57  
58  
59  
60

1  
2  
3 194 Internal facilitators that emerged from analysis were the development of coping strategies and  
4  
5 195 learning when to seek help in the context of COPD self-management.  
6  
7  
8 196

9  
10 197 **Coping strategies:**

11  
12 198 Learning to cope was a key theme with a matter of fact and 'making the best of things' approach taken  
13  
14 199 to this new condition: *I didn't get depressed about (COPD diagnosis) or anything ... I thought well*  
15  
16 200 *you've got it, you've got to live with it* (Participant (P)1). Adaptation to a new normal occurred through  
17  
18 201 learning coping strategies and accepting a new pace of life: *'You have to perform at the rate your lungs*  
19  
20 202 *will let you. So you get slower and slower, year-by-year.'*(P11) Specific approaches were used to  
21  
22 203 manage symptom fluctuations, with one participant voicing: *'Quite often I get attacks... during the*  
23  
24 204 *night if the temperature drops suddenly... But I can control that quite often - I get up and make a cup*  
25  
26 205 *of coffee and sit up in the chair ... then I go back to bed and I'm alright the next morning'*. Others  
27  
28 206 discussed how they learnt how to retain activities that gave them joy: *'...we did a lot of dancing and if*  
29  
30 207 *I got really hot I'd have to go out of the hall into the fresh air ... I'd go out there and I could settle my*  
31  
32 208 *breathing down.'* (P1).  
33  
34  
35  
36  
37  
38

39 210 **Knowing when to seek help**

40  
41 211 Development of knowledge in how and when to seek help also facilitated adaptation and capacity for  
42  
43 212 self-management. Training in seeking help without delay was voiced as important to avoiding acute  
44  
45 213 deterioration: *'Well; self-management, from what they've told me and what they've taught me, is to*  
46  
47 214 *live as comfortably as you can with your disease you've got and don't "buggerise around if you get*  
48  
49 215 *crook" [delay if you get sick].'*(P10). Recognising deterioration was important: *'You're either on a high*  
50  
51 216 *or you're on a low. You can feel yourself going down.'*(P13), as was knowing when to access emergency  
52  
53 217 services: *'Well if it gets to the stage where he can't breathe properly - into the hospital. That's just*  
54  
55 218 *what we do'* (partner of P5).  
56  
57  
58  
59  
60

1  
2  
3 2204  
5 221 **External Facilitators** to COPD self-management6  
7 222 External facilitators related to the centrality of a known doctor; the health team going 'above and  
8  
9 223 beyond' and social support.10  
11  
12 22413  
14 225 **Centrality of known doctor**15  
16 226 Continuity of care with practitioners led to supportive long-term relationships: '*He's (GP) my rock*' (P9)  
17  
18 227 and '*if (doctor) were to leave and go somewhere else I don't know what I'd do.*'(P3). Coordination19  
20 228 between health members was also raised as important: '*with different things she'd (GP) say 'I'll ring*  
21  
22 229 *(the patient's physician) and talk to her about it. So they worked hand in hand*' (P12). Integration of23  
24 230 health professionals within the community also facilitated trust and confidence for patients to express  
25  
26 231 their needs: '*(Doctor) happened to be one of my neighbours.... He asked 'how is Rufus (my dog)? How*27  
28 232 *are you going? He even said 'what's your wife doing? Your clothesline is chock-a-block (full) every day*'.29  
30 233 *Then he started talking, he says 'What is it?' I said, 'look mate, I'm not happy, I want to go home'* (P7).31  
32 234 Rural workforce shortages can inhibit urgent care, however those with established relationships were  
33  
34 235 accorded access: '*He said to me, if ever I can't get in, tell them I've got to see him*'(P9), similarly another35  
36 236 patient voiced: '*I talk to the girls at the counter and I've got to book in three months ahead. I said I'm*  
37  
38 237 *not booking into you for three months ahead - I said I'll ring you ... she puts me in every time*'(P13).39  
40  
41 23842  
43  
44 239 **Health team going 'above and beyond'**45  
46 240 Throughout the interviews participants provided examples of when health professionals had gone  
47  
48 241 'above and beyond' to provide support, from simple presence: '*while I was in hospital (doctor) came*49  
50 242 *in nearly every day and he didn't have to*'(P13), to assisting with community access: '*(Doctor) came*  
51  
52 243 *'round to my place and sat down with my medications. She took them up to the chemist herself and*53  
54 244 *got them put into a Webster pack (Dosette-box)*'(P8). Several doctors went as far as providing their  
55  
56 245 private contact details: '*We had to see (doctor) before we went on holiday and she'd give us her mobile*

1  
2  
3 246 *number and “if anything happens, call me straight away”* (P11). Assistance with policy constraints  
4  
5 247 were also noted, these little and kind adjustments were keenly felt by participants: *‘They let us sneak*  
6  
7 248 *through the door which brought us right in. Words cannot explain how great they were. We were so*  
8  
9 249 *comfortable with all the staff that we could have asked them anything’* (P9).  
10  
11

12 250

### 14 251 **Social support**

16 252 Community supports created the sense of an ‘inclusive village’, with non-health workers, such as bus  
17  
18 253 drivers, supporting participants to be independent: *‘They’re great. They lift me up on the thing*  
19  
20 254 *(disability access ramp) because I’ve got the oxygen’*(P6). Family and caregiver support were also  
21  
22 255 clearly articulated, both in day-to-day care, but also with logistical challenges: *‘The other night the*  
23  
24 256 *power went off. So that’s when you really need somebody ... you’ve got to go and get an oxygen bottle*  
25  
26 257 *and set it up to breathe.’*(P6). Caregiver support extended to recognition of symptoms and decision-  
27  
28 258 making, as well as recognising when to pace activities: *‘(She) will pick very quickly if I’m tiring. You*  
29  
30 259 *never say stop ... Just one more thing’* (P11).  
31  
32

34 260 Similarly, peer support was also raised in the context of community through pulmonary rehabilitation:  
35  
36 261 *(Pulmonary rehabilitation) is amazing. Number 1, you go there for exercises. Number 2- beautiful to*  
37  
38 262 *sit there and talk to the next person. They all got similar things ... We just listen to one another and*  
39  
40 263 *then naturally crack up a joke or something ... We look after one another.*(P7)  
41  
42

43 264

### 45 265 **Internal Barriers to self-management of COPD**

47  
48 266 Loss of identity, lack of access and clear communication and socio-economic and cultural challenges  
49  
50 267 were raised as the key barriers to self-management to COPD in the rural context.  
51

52 268

53 269

### 55 270 **Loss of Identity**

57  
58 271 Participants expressed a loss of identity and the associated psychological impact, particularly through  
59  
60

1  
2  
3 272 changed work-life role: *'I was forced to retire. I didn't like the idea of it. I was depressed'* (P7). This was  
4  
5 273 also expressed as loss of something that brought joy: *'I was that wrecked (by having to retire). It was*  
6  
7 274 *unbelievable. I don't think that anybody would have loved their jobs as much I loved mine'* (P8).  
8  
9  
10 275 Emotional distress was also connected with the unrelenting nature of the condition: *'I thought, this is*  
11  
12 276 *not worth it. What's the use in living when you suffer like this even though my mind is clear and*  
13  
14 277 *everything?'* (P7). One caregiver also expressed distress at seeing the progressive decline and impact:  
15  
16 278 *'He was deteriorating before my eyes. He also suffered depression because of all this pain'* (P13).  
17  
18  
19 279

## 20 21 280 **External Barriers to self-management of COPD**

### 22 23 281 **Lack of access and clear communication**

24  
25 282 Issues of staff retention in the rural workforce raised barriers to continuity of care and effective  
26  
27 283 communication: *'You don't even get to know (the GPs), 18 months and they're gone'* (P14). Reduced  
28  
29 284 numbers of health professionals also caused delays in access: *'I could only access her every six weeks*  
30  
31 285 *at the least. You could never get her if you were sick.'*(P3) Similarly, limited alternatives left some  
32  
33 286 participants to rely on emergency services: *'I've gone down to see a doctor, and I've clashed, or*  
34  
35 287 *whatever. So they've rang an ambulance and said, go to hospital.'*(P8). Communication with unfamiliar  
36  
37 288 clinicians also at times left some participants feeling in the dark: *'I was in hospital two weeks ago and*  
38  
39 289 *it wasn't until a week after I got out, with my GP, that I actually found out what was the matter with*  
40  
41 290 *me'* (P4).The need to continually re-tell their story was also a frustration when health professionals  
42  
43 291 appeared to not communicate with one another:

44  
45  
46  
47  
48 292 *'there's been a few times where I've gone to emergency. You explain the situation - like, you're*  
49  
50 293 *having trouble breathing as it is. They're trying to say oh, how long have you been like this for?*  
51  
52 294 *Have [they] got any medical records? You'll see what's the matter with me is! And then the*  
53  
54 295 *next doctor comes in for the next shift - they say oh, what are you here for? Talk to each other*  
55  
56 296 *instead of having to ask the patients.'* (P8).  
57  
58  
59 297  
60



1  
2  
3 2984  
5 299 **Socio-cultural challenges**

6  
7 300 In contrast to those who voiced positive social inclusion; others expressed social isolation: *I wasn't*  
8 301 *coping. I wasn't well enough to do my own food preparation ... I'm fairly new and I'm not a local - I*  
9  
10 302 *didn't know anyone so you don't like asking someone'* (P14). In contrast to those afforded access  
11  
12 303 through established relationships, participants newly arrived felt disconnected from support:

13  
14  
15  
16 304 *'The community clinic was the one that I accessed because they HAD TO take new patients.*  
17  
18 305 *That was my only avenue at the time ... I needed to access somebody who knew me because*  
19 306 *[COPD] doesn't go by the record sort of thing ... when you get sick, you're sick enough to need*  
20  
21 307 *care straight away'.*(P14)

22  
23  
24  
25 308 Financial impact was raised several times, with participants having to balance treatments choices as  
26  
27 309 well as resource choices to stay well: *'We chose to increase the temperature of the house by a few*  
28 310 *degrees. It's just another cost'* (P11). The requirement to replace the stove for oxygen therapy safety  
29  
30 311 was an added burden, and support for such measures was perceived to be influenced by social  
31  
32 312 circumstance: *'If you were living in Housing Commission you would be subsidised, but because we were*  
33  
34 313 *(self-funded retirees) ... nothing'.*(P6).

35  
36  
37  
38  
39 31440  
41 315 **DISCUSSION:**

42  
43 316 This study explored patient experiences of living with and managing COPD in the rural context. Our  
44  
45 317 results suggested that community inclusion, or inclusion in the 'village' context, moderated adaptation  
46  
47 318 to a 'new normal' of living with COPD, and enhanced a person's ability to cope and ultimately self-  
48  
49 319 manage their condition. Community inclusion also influenced whether a person experienced either a  
50  
51 320 net balance of positive *facilitators* (knowledge of coping strategies and when to seek help, a central,  
52  
53 321 known doctor, a health care team 'going above and beyond', social supports) or more pronounced  
54  
55 322 balance of net negative *barriers* (loss of identity, lack of communication between health care team,  
56  
57 323 socioeconomic or cultural disadvantage) to living with and managing COPD. The factors experienced

1  
2  
3 324 by this rural population are highly relevant to people living in a variety of settings, including urban and  
4  
5 325 suburban environments. However, the impact of these factors may be amplified in rural communities  
6  
7 326 where there may be constrained choice and access to community support providers. Supportive social  
8  
9 327 networks and a sense of 'place' are linked to decreased COPD readmission and are recognised as being  
10  
11 328 strong and highly valued in rural areas (33).

12  
13  
14 329

15  
16 330 The benefits of social connection, social support, living with a caregiver, and peer support through  
17  
18 331 pulmonary rehabilitation are well recognised in COPD and have been reported widely in previous  
19  
20 332 literature (17, 34) and are evident in the present study. These benefits have been shown to reduce  
21  
22 333 the likelihood of smoking, increase exercise capacity, reduce emergency department visits and  
23  
24 334 enhance coping.(35, 36) Conversely, loss of identity, (18) poor continuity of care from health  
25  
26 335 professionals, poor communication between members of the health care team,(37) exclusion from  
27  
28 336 social networks, and socioeconomic disadvantage are equally recognised as key barriers.(38) These  
29  
30 337 influences are associated with reduced coping ability, decreased help seeking, (39) the need to  
31  
32 338 continually repeat medical history, and are barriers to develop trusting relationships with health  
33  
34 339 professionals. (40). In comparison with other qualitative Australian studies into the patient's  
35  
36 340 experience of COPD, beneficial impacts were reported when patients felt supported by community  
37  
38 341 members and health professionals (33, 41, 42), connected to people and nature (41), felt a strong  
39  
40 342 sense of community (42) and felt listened to by health professionals (43).

41  
42  
43 343

44  
45  
46 344 The strength of this study is the exploration of a range of medical, emotional and social supports, and  
47  
48 345 the way these impact people living with COPD in the rural context. Our findings suggest that a rural  
49  
50 346 'village' existed for these patients that encompassed supportive health professionals, family, friends  
51  
52 347 and community members, as has been shown in maternal and child health and healthy ageing contexts  
53  
54 348 (19)(20, 21). The understandings regarding social connectedness and the benefit of living within a  
55  
56 349 supportive 'village' in a rural context are likely highly relevant to other settings, including urban areas,  
57  
58  
59  
60

1  
2  
3 350 and could be used to model social supports for others living with COPD . The extent to which a person  
4  
5 351 living with COPD is included in this 'village' is variable and has a marked influence on coping and self-  
6  
7 352 management ability. Inclusion in the 'village', where one's neighbour could also be one's doctor or  
8  
9  
10 353 where family members were given the GP's private telephone number, was strongly facilitative. There  
11  
12 354 were many examples provided of close, trusting, long term relationships with doctors, health  
13  
14 355 professionals 'going above and beyond', and social supports that enabled COPD management within  
15  
16 356 the rural context. Similarly, self-management of COPD has been depicted as being built upon a  
17  
18 357 pyramid of four categories of people (the patient (at the apex), their partner, their physician and the  
19  
20 358 public's perception of the disease).(44) Perhaps this pyramid also depicts both the source and  
21  
22 359 importance of each category of people to a person living with COPD.  
23  
24  
25  
26 360

27  
28 361 Previous studies have reported that COPD related symptoms and behaviours, such as coughing in  
29  
30 362 public and wearing an oxygen mask, heighten feelings of self-blame due to historical smoking, and  
31  
32 363 have been linked to feelings of loneliness and embarrassment. (17, 18) However, self-blame was not  
33  
34 364 a prominent theme in this study, perhaps due to the protective aspects of social 'inclusion' within  
35  
36 365 these established rural communities. Similarly, while much of rural health discourse focuses on deficits  
37  
38 366 in care and experience,(45) and that respiratory care within the explored region is based on a rural  
39  
40 367 generalist model, participants in this study did not speak of 'missing out' on services, information or  
41  
42 368 access to specialists. This may be because those living in rural contexts are unaware of other models  
43  
44 369 of care delivered through metropolitan centres, or that they believed they were receiving the care  
45  
46 370 that met their needs, or the desire to receive services locally or from familiar people was more  
47  
48 371 important than accessing a different model of care elsewhere. Further research is required to  
49  
50 372 understand this perspective, given the unequivocal evidence that there is a lack of access to specialist  
51  
52 373 services in this and other rural contexts.  
53  
54  
55  
56 374

57  
58  
59 375 This study was undertaken at a single site with a sample of people who had been hospitalised with  
60

1  
2  
3 376 COPD in the preceding 12 months. As such, it is likely to reflect only those perspectives of people who  
4  
5 377 have been in recent contact with health services and were willing to undertake an interview. However,  
6  
7 378 the strength of this work is that it provides important insights into rural healthcare experience and  
8  
9 379 inclusively explored medical, social and emotional supports in this context.  
10  
11  
12 380

13  
14 381 The results of this study suggest that adaptation, coping and effective self-management are enhanced  
15  
16 382 via a range of medical, emotional and social supports. There is substantial value of pulmonary  
17  
18 383 rehabilitation as a *de facto* community and the benefit of a social 'village' in supporting people with  
19  
20 384 chronic progressive disease. Health professionals may consider assessing patients for level of  
21  
22 385 social/community inclusion and connecting patients with available services in the community. This  
23  
24 386 may be of particular importance given the relationship seen between social exclusion and sub-optimal  
25  
26 387 coping.  
27  
28  
29

30 388  
31  
32 389 Social support is known to positively influence psychological health and self-efficacy of people with  
33  
34 390 COPD, however less is known about the benefits this confers on overall quality of life and physical  
35  
36 391 functioning (46) particularly in the rural context. (24) The benefit and experience of living in a  
37  
38 392 supportive 'village' community could be further explored in the urban context to further understand  
39  
40 393 the complexities of non-medical social and emotional support. Furthermore, the patient perspective  
41  
42 394 of coping strategies and self-management approaches could be used to inform more user-friendly  
43  
44 395 education material to address the recognised poor knowledge and understanding of COPD.(47)  
45  
46  
47

48 396

## 49 397 **CONCLUSION**

50  
51  
52 398 In this study, the rural context offered an advantage for the people with COPD who experienced  
53  
54 399 inclusion (in the 'village'), with the centrality of a known doctor and a health professional team willing  
55  
56 400 to go 'above and beyond' key to this positive experience. Evidence of the benefit of strong social and  
57  
58 401 family supports were noted, in line with prior studies. Understanding barriers and facilitators to  
59  
60

1  
2  
3 402 supported COPD self-management will help inform future rural workforce and service development.  
4

5 403 Further research is needed to understand how social networks within the broader social structural  
6  
7 404 conditions influence the way in which patients live with and manage their disease, and to compare  
8  
9 405 experiences of COPD in rural and urban contexts.  
10  
11

12 406

13  
14 407 **Acknowledgements:** We wish to thank the participants of this study and staff at the recruiting sites.

15  
16 408 We sincerely thank the team involved in the Managing Chronic Disease in Wangaratta and Benalla  
17  
18 409 project, in particular Tessa Archbold, Megan Tharratt, Jan Lang, Tammie Long and David Kidd.  
19

20  
21 410 **Data sharing statement:**

22  
23 411 All data relevant to the study are included in the article or uploaded as supplementary information.  
24

25 412 **Conflicts of interest:** None declared

26  
27 413 **Funding:** This research did not receive any specific grant from funding agencies in the public,  
28  
29 414 commercial or not-for-profit sectors. The authors are supported by the Australian Government  
30  
31 415 Department of Health through the Rural Health Multidisciplinary Training Programme.  
32  
33

34 416  
35  
36  
37  
38  
39  
40  
41  
42  
43  
44  
45  
46  
47  
48  
49  
50  
51  
52  
53  
54  
55  
56  
57  
58  
59  
60

Table 1: Example of analysis process and illustrative quotes

|                       | Category                  | Sub-category                             | Code                                   | Condensed meaning unit                                                                  | Meaning unit                                                                                                                                                                                                                                                                                                                                                                         |
|-----------------------|---------------------------|------------------------------------------|----------------------------------------|-----------------------------------------------------------------------------------------|--------------------------------------------------------------------------------------------------------------------------------------------------------------------------------------------------------------------------------------------------------------------------------------------------------------------------------------------------------------------------------------|
| Internal facilitators | Coping Strategies         | Individual approaches to self-management | Matter of fact approach to COPD        | Making the best of things                                                               | I didn't get depressed about it (COPD diagnosis) or anything, no, I thought well you've got it, you've got to live with it <b>(P1)</b>                                                                                                                                                                                                                                               |
|                       |                           |                                          | Acceptance of slowed pace.             | There is no problem with her going on the train with the oxygen. It just slows you down | It just slows you down. You have to perform at the rate your heart will let you, and you have to perform at the rate your lungs will let you. So you get slower and slower, year-by-year. <b>(P1)</b>                                                                                                                                                                                |
|                       |                           |                                          | Learning approaches to manage symptoms | But I can control that... I go back to bed and I'm alright the next morning             | There is no problem with her going on the train with the oxygen. So that's not a problem. It's just a matter of putting her on the train and the oxygen will last for eight hours. <b>(P3)</b>                                                                                                                                                                                       |
|                       |                           |                                          | Working to retain activities of joy    | I could settle my breathing down                                                        | Quite often I get attacks - mild attacks - during the night if the temperature drops suddenly and it's cold, and I haven't had the heater on or something enough that can set me off. But I can control that quite often - I get up and make a cup of coffee and sit up in the chair and turn the heating on and then I go back to bed and I'm alright the next morning <b>(P14)</b> |
|                       | Knowing when to seek help | Knowing when to seek help                | Acting on warning signs                | Don't delay if you get unwell                                                           | ...we did a lot of dancing and if I got really hot I'd have to go out of the hall into the fresh air, I felt like I was suffocating in the hall and I'd go out there and I could settle my breathing down by getting the fresh air outside. <b>(P1)</b>                                                                                                                              |
|                       |                           |                                          | Recognising changes                    | You can feel yourself going down                                                        | 'So he still goes out and enjoys that, but he doesn't dance every dance like he used to' <b>(P11)</b>                                                                                                                                                                                                                                                                                |
|                       |                           |                                          |                                        |                                                                                         | Well self-management from what they've told me and what they've taught me is to live as comfortably as you can with what you've got - with your disease you've got and don't buggerise around if you get crook [delay if you get sick]. That's it. <b>(P15)</b>                                                                                                                      |
|                       |                           |                                          |                                        |                                                                                         | You're either on a high or you're low. You can feel yourself going down and I have a boost of prednisolone. I used to have 25 for three days, 12 and a half for three days, and then five for seven days. <b>(P1)</b>                                                                                                                                                                |

|                       |                                    |                                          |                                                                                 |                                                                                                                                                                                                            |                                                                                                                                                                                                                                                                                                                                                                                                                                                                                                                                                                                                                                                                                                                                                                                                                                                                                                                                                                                                                                                                                                                                                                                                                                                                                                                                                                                                                                                                                                                                                                              |
|-----------------------|------------------------------------|------------------------------------------|---------------------------------------------------------------------------------|------------------------------------------------------------------------------------------------------------------------------------------------------------------------------------------------------------|------------------------------------------------------------------------------------------------------------------------------------------------------------------------------------------------------------------------------------------------------------------------------------------------------------------------------------------------------------------------------------------------------------------------------------------------------------------------------------------------------------------------------------------------------------------------------------------------------------------------------------------------------------------------------------------------------------------------------------------------------------------------------------------------------------------------------------------------------------------------------------------------------------------------------------------------------------------------------------------------------------------------------------------------------------------------------------------------------------------------------------------------------------------------------------------------------------------------------------------------------------------------------------------------------------------------------------------------------------------------------------------------------------------------------------------------------------------------------------------------------------------------------------------------------------------------------|
|                       | Centrality of a known doctor       | Continuity, trust, and connection        | Central to support and coordination of care<br><br>Providing access when needed | Central position of support<br><br>Doctor integrated as part of community<br><br>You couldn't get an appointment with her because she was booked out all the time<br><br>Converse impact of lack of access | <p>He's (GP) my rock <b>(P9)</b></p> <p>Well if (doctor) were to leave and go somewhere else I don't know what I'd do. <b>(P3)</b>. 'with different things she'd (GP) say 'I'll ring (doctor 1) and talk to her about it. So they worked hand in hand' <b>(P12)</b>.</p> <p>He happened to be one of my neighbours. He then asked 'how is Rufus (my dog) going? How are you going? He even said 'what's your wife doing? Your clothesline is chock-a-block every day'. Then he started talking, he says 'What is it?' I said, 'look mate, I'm not happy, I want to go home' <b>(P7)</b></p> <p>He said to me, if ever I can't get in, tell them I've got to see him, yes.<b>(P9)</b></p> <p>My GP is really good. I say to her, it's no good me making an appointment with you - I said this quite a while back - because I talk to the girls at the counter there and I've got to book in three months ahead. I said I'm not booking into you for three months ahead. I said I'll ring you and let you know when I'm free. When I'm free....She puts me in every time. <b>(P7)</b></p> <p>They only had the one lady doctor - and she'd been there forever apparently, highly regarded. So I got an appointment with her and she did all these tests on me and checked blood tests and everything. Found out that I was okay as such, and - but I could only access her every six weeks at the least. You could never get her if you were sick. Just because you were sick you couldn't get an appointment with her because she was booked out all the time <b>(P3)</b></p> |
| External Facilitators | Health team going above and beyond | Patients supported with inclusive access | Going the extra mile to accommodate and care for patients                       | Visiting and providing support<br><br>Giving patients their private number<br><br>Facilitating access                                                                                                      | <p>while I was in hospital (doctor 2) came in nearly every day and he didn't have to' <b>(P13)</b></p> <p>(Doctor) came round to my place and sat down with my medications. She took them up to the chemist herself and got them put into a (Dosette-box). So I go to the chemist, now, and pick them up in a (Dosette Box). <b>(P8)</b></p> <p>We had to see her (doctor 1) before we went on holiday and she'd give us her mobile number and "if anything happens, call me straight away"<b>(P11)</b></p> <p>Well (wife) went overseas. (Doctor) said well what are you doing? I decided not to come ... I'm going to family. (Doctor) said okay, give the family my number. Here's some extra medication, and this is the instructions if something happens. <b>(P11)</b></p> <p>They let us (daughters of patient with COPD) sneak through the door around the other side, which brought us right in. Words cannot explain how great they were. We were so comfortable with all the staff that we could have asked them anything, every button they pressed on a machine, every tube they played with, they explained to us what they were doing <b>(P9)</b></p>                                                                                                                                                                                                                                                                                                                                                                                                         |

## Rural COPD management

|                   |                  |                                                                                                 |                                                                                                                                                                                                                |                                                                                                                                                                                                                                                                                                                                       |                                                                                                                                                                                                                                                                                                                                                                                                                                                                                                                                                                                                                                                                                                                                                                                                                                                                                                                                                                                                                                                                                                                                                                                                                                                                                                                                                                                                                                                                                                                                                                                                                                                                                                                                                      |
|-------------------|------------------|-------------------------------------------------------------------------------------------------|----------------------------------------------------------------------------------------------------------------------------------------------------------------------------------------------------------------|---------------------------------------------------------------------------------------------------------------------------------------------------------------------------------------------------------------------------------------------------------------------------------------------------------------------------------------|------------------------------------------------------------------------------------------------------------------------------------------------------------------------------------------------------------------------------------------------------------------------------------------------------------------------------------------------------------------------------------------------------------------------------------------------------------------------------------------------------------------------------------------------------------------------------------------------------------------------------------------------------------------------------------------------------------------------------------------------------------------------------------------------------------------------------------------------------------------------------------------------------------------------------------------------------------------------------------------------------------------------------------------------------------------------------------------------------------------------------------------------------------------------------------------------------------------------------------------------------------------------------------------------------------------------------------------------------------------------------------------------------------------------------------------------------------------------------------------------------------------------------------------------------------------------------------------------------------------------------------------------------------------------------------------------------------------------------------------------------|
|                   | Social support   | <p>Community supports assisting with independence</p> <p>Family support</p> <p>Peer support</p> | <p>Community support independent living and watching over and taking care</p> <p>Family support with day to day and in recognising and managing symptoms</p> <p>Community through pulmonary rehabilitation</p> | <p>The bus drivers are great, they lift me up because I've got oxygen</p> <p>He Fell over in the garden one of them lifted him up</p> <p>Family provide care and support – day to day and in time of need</p> <p>Family assist with recognition of symptom changes</p> <p>We look after one another and talk nicely and beautiful</p> | <p>'When I go up the street on the bus, the bus drivers, they're great. They will lift me up on the thing, because I've got the oxygen, I can lift up and that. At the picture theatre I find, and everywhere I go actually, I find them very good' (P6)</p> <p>We get along very well with the maintenance fellows. (Patient with COPD) fell over in the garden out the side and one of the maintenance boys came up, lifted him up' (P5)</p> <p>The other night the power went off. So that's when you really need somebody ... you've got to go and get an oxygen bottle and set it up to breathe. (P6).</p> <p>Like at one stage what was about 12 of us in there with you (Mum, in Critical Care), (nurses) did not bat an eyelid. They (nurses) could see that the family support was what was keeping her going (daughter of participant 9). (She) helps me put my socks on, tells me to get out of bed. Tells me not to drink too much. General company. It's really what it is. (She) will pick very quickly if I'm tiring. You never say stop. Just one more thing. I get that a lot. So I'm running on the Plimsoll line all the time. Just one more thing, then we'll go home. (P11)</p> <p>Pulmonary rehabilitation also created an important community: Oh my goodness, (pulmonary rehabilitation) is amazing. See, number 1, you go there for exercises. Number 2- beautiful to sit there and talk to the next person. They all got similar things. We're talking about how someone feels shit. Somebody's better, somebody's worse. We just listen to one another and then naturally crack up a joke or something which they said laughter is better than medicine. We look after one another and talk nicely and beautiful.(P7)</p> |
| Internal Barriers | Loss of Identity | <p>Impact of restriction in social worth and contribution</p> <p>Impact on mental health</p>    | <p>Loss of social role</p> <p>Mental health distress over unrelenting condition</p>                                                                                                                            | <p>Forced by COPD into early retirement/ Loss of loved work role</p> <p>Living a life of suffering</p>                                                                                                                                                                                                                                | <p>I was that wrecked (by having to give up work due to COPD). It was unbelievable. I don't think that anybody would have loved their jobs as much I loved mine' (P8)</p> <p>'I thought, this is not worth it. What's the use in living when you suffer like this even though my mind is clear and everything?' (P7)</p> <p>Oh, my - if I could turn the clock back, every person that told me of the person and the people that were suffering from it, I would listen to the first person and shake the shit away, wouldn't touch it again. (P7)</p>                                                                                                                                                                                                                                                                                                                                                                                                                                                                                                                                                                                                                                                                                                                                                                                                                                                                                                                                                                                                                                                                                                                                                                                               |



|                   |                                        |                                        |                              |                                                                                                           |                                                                                                                                                                                                                                                                                                                                                                                                                                                                                                                                                                                                                                                                                                                 |
|-------------------|----------------------------------------|----------------------------------------|------------------------------|-----------------------------------------------------------------------------------------------------------|-----------------------------------------------------------------------------------------------------------------------------------------------------------------------------------------------------------------------------------------------------------------------------------------------------------------------------------------------------------------------------------------------------------------------------------------------------------------------------------------------------------------------------------------------------------------------------------------------------------------------------------------------------------------------------------------------------------------|
| External Barriers | Lack of access and clear communication | Lack of access and clear communication | High staff turnover          | Don't even get to know the GPs, 18 months and they're gone                                                | You don't even get to know (the GPs), 18 months and they're gone (P14)<br>But the new one didn't like (local town) so they left. He was replaced by an equally good one who didn't like (local town) and left. (P3).                                                                                                                                                                                                                                                                                                                                                                                                                                                                                            |
|                   |                                        |                                        | Limited alternatives         | I could only access her every six weeks/ I've clashed, they've rang the ambulance and said go to hospital | They only had the one lady doctor - and she'd been there forever apparently, highly regarded. ... but I could only access her every six weeks at the least. You could never get her if you were sick. <b>(P3)</b>                                                                                                                                                                                                                                                                                                                                                                                                                                                                                               |
|                   |                                        |                                        | Lack of communication        | Don't they read the files?                                                                                | I've gone down to see a doctor, and I've clashed, or whatever. So they've rang an ambulance and said, go to hospital (P8)<br>I was in hospital two weeks ago and it wasn't until a week after I got out with my GP that I actually found out what was the matter with me'. (P14)                                                                                                                                                                                                                                                                                                                                                                                                                                |
|                   |                                        |                                        | Having to repeatedly explain | The next doctor comes in, you've got to explain it again.                                                 | There's been a few times where I've gone to emergency. You explain the situation - like, you're having trouble breathing as it is. They're trying to say oh, how long have you been like this for? Have [they] got any medical records? You'll see what's the matter with me is! Do you know what I mean? ... and then the next doctor comes in for the next shift. Then they say oh, what are you here for? Talk to each other instead of having to ask the patients. <b>(P8)</b><br>Then the next doctor comes in for the next shift. Then they say oh, what are you here for, and you've got to explain it. Don't you read the files? Talk to each other, instead of having to ask the patients. <b>(P8)</b> |



## REFERENCES

1. Fromer L. Implementing chronic care for COPD: planned visits, care coordination, and patient empowerment for improved outcomes. *Int J Chron Obstruct Pulmon Dis*. 2011;6:605-14.
2. Adeloje D, Chua S, Lee C, Basquill C, Papan A, Theodoratou E, et al. Global and regional estimates of COPD prevalence: Systematic review and meta-analysis. *Journal of global health*. 2015;5(2):020415.
3. Murray CJ, Atkinson C, Bhalla K, Birbeck G, Burstein R, Chou D, et al. The state of US health, 1990-2010: burden of diseases, injuries, and risk factors. *Jama*. 2013;310(6):591-608.
4. Fletcher M, Upton J, Taylor-Fishwick J, Buist S, Jenkins C, Hutton J, et al. COPD uncovered: an international survey on the impact of chronic obstructive pulmonary disease [COPD] on a working age population. *BMC Public Health*. 2011;11(1):612.
5. Murray SA, Kendall M, Boyd K, Sheikh A. Illness trajectories and palliative care. *Bmj*. 2005;330(7498):1007-11.
6. Rabe KF, Hurd S, Anzueto A, Barnes PJ, Buist SA, Calverley P, et al. Global strategy for the diagnosis, management, and prevention of chronic obstructive pulmonary disease: GOLD executive summary. *American journal of respiratory and critical care medicine*. 2007;176(6):532-55.
7. Hillas G, Perlikos F, Tsiligianni I, Tzanakis N. Managing comorbidities in COPD. *International Journal of Chronic Obstructive Pulmonary Disease*. 2015;10:95-109.
8. Hillas G, Perlikos F, Tsiligianni I, Tzanakis N. Managing comorbidities in COPD. *Int J Chron Obstruct Pulmon Dis*. 2015;10:95-109.
9. Williams V, Hardinge M, Ryan S, Farmer A. Patients' experience of identifying and managing exacerbations in COPD: a qualitative study. *NPJ primary care respiratory medicine*. 2014;24:14062.
10. Bucknall CE, Miller G, Lloyd SM, Cleland J, McCluskey S, Cotton M, et al. Glasgow supported self-management trial (GSuST) for patients with moderate to severe COPD: randomised controlled trial. *BMJ*. 2012;344.
11. Benzo RP, Abascal-Bolado B, Duloher MM. Self-management and quality of life in chronic obstructive pulmonary disease (COPD): The mediating effects of positive affect. *Patient education and counseling*. 2016;99(4):617-23.
12. Hopley M, Horsburgh M, Peri K. Barriers to accessing specialist care for older people with chronic obstructive pulmonary disease in rural New Zealand. *Journal of primary health care*. 2009;1(3):207-14.
13. Jackson K, Oelke ND, Besner J, Harrison A. Patient journey: implications for improving and integrating care for older adults with chronic obstructive pulmonary disease. *Canadian journal on aging = La revue canadienne du vieillissement*. 2012;31(2):223-33.
14. Swanson E.J., Rice K.L., Rector T.S., Westanmo A.D., Duane P.G. Quality of Chronic Obstructive Pulmonary Disease-Related Health Care in Rural and Urban Veterans Affairs Clinics. *Federal Practitioner*. 2017:27-32.
15. Goodridge D, Hutchinson S, Wilson D, Ross C. Living in a rural area with advanced chronic respiratory illness: a qualitative study. *Primary care respiratory journal : journal of the General Practice Airways Group*. 2011;20(1):54-8.
16. Lockett T, Phillips J, Johnson M, Garcia M, Bhattarai P, Carrieri-Kohlman V, et al. Insights from Australians with respiratory disease living in the community with experience of self-managing through an emergency department 'near miss' for breathlessness: a strengths-based qualitative study. 2017;7(12):e017536.
17. Halting A-G, Wahl A, Heggdal K. 'Belonging'. 'Patients' experiences of social relationships during pulmonary rehabilitation. *Disability and Rehabilitation*. 2010;32(15):1272-80.
18. Disler RT, Green A, Lockett T, Newton PJ, Currow D, Davidson PM. Experience of Advanced Chronic Obstructive Pulmonary Disease: Metasynthesis of Qualitative Research. *Jnl Pain Sym Mgt*. 2014.
19. Lush B, Boddy J. Reflections on the Value of a Supportive 'Village' Culture for Parents, Carers,

- and Families: Findings from a Community Survey. *Journal of Social Inclusion*. 2014;5(2):44-55.
20. Graham C, Scharlach AE, Kurtovich E. Do villages promote aging in place? Results of a Longitudinal Study. *Journal of Applied Gerontology*. 2018;37(3):310-31.
21. McDonough KE, Davitt JK. It takes a village: Community practice, social work, and aging-in-place. *Journal of Gerontological Social Work*. 2011;54(5):528-41.
22. Ziersch AM, Baum F, Darmawan IGN, Kavanagh AM, Bentley RJ. Social capital and health in rural and urban communities in South Australia. *Australian and New Zealand journal of public health*. 2009;33(1):7-16.
23. Manderson L. Social capital and inclusion: Locating wellbeing in community. *Australian Cultural History*. 2010;28(2-3):233-52.
24. Brundisini F, Giacomini M, DeJean D, Vanstone M, Winsor S, Smith A. Chronic disease patients' experiences with accessing health care in rural and remote areas: a systematic review and qualitative meta-synthesis. *Ontario health technology assessment series*. 2013;13(15):1-33.
25. Tong A, Sainsbury P, Craig J. Consolidated criteria for reporting qualitative research (COREQ): a 32-item checklist for interviews and focus groups. *International journal for quality in health care*. 2007;19(6):349-57.
26. Braun V, Clarke V. Using thematic analysis in psychology. *Qualitative research in psychology*. 2006;3(2):77-101.
27. Thomas J, Harden A. Methods for the thematic synthesis of qualitative research in systematic reviews. *BMC Medical Research Methodology*. 2008;8:<http://www.biomedcentral.com/content/pdf/1471-2288-8-45.pdf>.
28. Victorian Department of Health. Wangaratta. 2012.
29. State Government of Victoria Department of Health. Benalla. Department of Health, 2014.
30. Creswell JW. *Research Design: Qualitative, Quantitative, and Mixed Methods Approaches*. 3rd ed. London: Sage; 2009.
31. Davidson PM, Halcomb E, Gholizadeh L. Focus groups in health research and nursing. In: Liamputtong P, editor. *Research methods in health: Foundations for evidence-based practice*: Oxford University Press, Australia & New Zealand; 2013. p. 54-71.
32. Kerr C, Nixon A, Wild D. Assessing and demonstrating data saturation in qualitative inquiry supporting patient-reported outcomes research. *Expert review of pharmacoeconomics & outcomes research*. 2010;10(3):269-81.
33. Sossai K, Gray M, Tanner B. Living with chronic obstructive pulmonary disease: experiences in northern regional Australia. *International Journal of Therapy and Rehabilitation*. 2011;18(11):631-41.
34. Gysels M, Higginson I. Self-management for breathlessness in COPD: the role of pulmonary rehabilitation. *Chronic respiratory disease*. 2009;6(3):133-40.
35. Trivedi RB, Bryson CL, Udriș E, Au DH. The influence of informal caregivers on adherence in COPD patients. *Annals of Behavioral Medicine*. 2012;44(1):66-72.
36. Wakabayashi R, Motegi T, Yamada K, Ishii T, Gemma A, Kida K. Presence of in-home caregiver and health outcomes of older adults with chronic obstructive pulmonary disease. *Journal of the American Geriatrics Society*. 2011;59(1):44-9.
37. Disler RT, Gallagher RD, Davidson PM. Factors influencing self-management in chronic obstructive pulmonary disease: an integrative review *Int Jnl Nsg Stu*. 2012;49:230-42.
38. Gardener AC, Ewing G, Kuhn I, Farquhar M. Support needs of patients with COPD: a systematic literature search and narrative review. *International journal of chronic obstructive pulmonary disease*. 2018;13:1021.
39. Shipman C, White S, Gysels M, White P. Access to care in advanced COPD: factors that influence contact with general practice services. *Primary care respiratory journal : journal of the General Practice Airways Group*. 2009;18(4):273-8.
40. Waibel S, Vargas I, Aller MB, Gusmao R, Henao D, Vazquez ML. The performance of integrated health care networks in continuity of care: a qualitative multiple case study of COPD patients. *International journal of integrated care*. 2015;15:e029.

- 1  
2  
3  
4  
5  
6  
7  
8  
9  
10  
11  
12  
13  
14  
15  
16  
17  
18  
19  
20  
21  
22  
23  
24  
25  
26  
27  
28  
29  
30
41. Lahham A, McDonald CF, Mahal A, Lee AL, Hill CJ, Burge AT, et al. Home-based pulmonary rehabilitation for people with COPD: A qualitative study reporting the patient perspective. *Chronic respiratory disease*. 2018;15(2):123-30.
42. Longman JM, Singer JB, Gao Y, Barclay LM, Passey ME, Pirotta JP, et al. Community based service providers' perspectives on frequent and/or avoidable admission of older people with chronic disease in rural NSW: a qualitative study. *BMC Health Serv Res*. 2011;11:265.
43. Walters JA, Cameron-Tucker H, Courtney-Pratt H, Nelson M, Robinson A, Scott J, et al. Supporting health behaviour change in chronic obstructive pulmonary disease with telephone health-mentoring: insights from a qualitative study. *BMC family practice*. 2012;13:55.
44. Kaptein AA, Fischer MJ, Scharloo M. Self-management in patients with COPD: theoretical context, content, outcomes, and integration into clinical care. *Int J Chron Obstruct Pulmon Dis*. 2014;9:907-17.
45. Bourke L, Taylor J, Humphreys JS, Wakerman J. "Rural health is subjective, everyone sees it differently": understandings of rural health among Australian stakeholders. *Health & place*. 2013;24:65-72.
46. Barton C, Effing TW, Cafarella P. Social support and social networks in COPD: A scoping review. *COPD: Journal of Chronic Obstructive Pulmonary Disease*. 2015;12(6):690-702.
47. Russell S, Ogunbayo OJ, Newham JJ, Heslop-Marshall K, Netts P, Hanratty B, et al. Qualitative systematic review of barriers and facilitators to self-management of chronic obstructive pulmonary disease: views of patients and healthcare professionals. *NPJ primary care respiratory medicine*. 2018;28(1):2.

31  
32  
33  
34  
35  
36  
37  
38  
39  
40  
41  
42  
43  
44  
45  
46  
47  
48  
49  
50  
51  
52  
53  
54  
55  
56  
57  
58  
59  
60

**Figure legend:**

Figure 1:

Facilitators and barriers to COPD self-management in the rural context. Adaptation to the 'new normal' of life with COPD and ability to self-manage were influenced by facilitators and barriers, moderated by inclusion.



Figure 1: Facilitators and barriers to COPD self-management in the rural context. Adaptation to the 'new normal' of life with COPD and ability to self-manage were influenced by facilitators and barriers, moderated by inclusion.

210x297mm (300 x 300 DPI)

**APPENDIX I INTERVIEW SCHEDULE**

1. Overall, what has your experience of having COPD been like?
2. Can you tell me a little about how and when your illness started and how that led to a diagnosis?  
Can you describe your initial thoughts to being diagnosed?
3. Have you received information about your condition?
4. What sorts of things do you do because of your condition (diet, exercise, use of health services)?
5. What types of support are you currently receiving?
6. How do you feel in yourself nowadays compared to before your diagnosis? How your life is going with your COPD?
7. How has your condition impacted on you financially?
8. How do you feel in yourself nowadays?
9. How has your illness affected your social life, relationships with friends and family?

32 item COREQ checklist, as per Tong, Sainsbury & Craig, 2007:

|                                |                                          |                                                                                                                                                  |        |
|--------------------------------|------------------------------------------|--------------------------------------------------------------------------------------------------------------------------------------------------|--------|
| 1.                             | Interviewer/facilitator                  | Which author/s conducted the interview or focus group?                                                                                           | Page 6 |
| 2.                             | Credentials                              | What were the researcher's credentials? <i>E.g. PhD, MD</i>                                                                                      | Page 6 |
| 3.                             | Occupation                               | What was their occupation at the time of the study?                                                                                              | Page 1 |
| 4.                             | Gender                                   | Was the researcher male or female?                                                                                                               | Page 6 |
| 5.                             | Experience and training                  | What experience or training did the researcher have?                                                                                             | Page 6 |
| Relationship with participants |                                          |                                                                                                                                                  |        |
| 6.                             | Relationship established                 | Was a relationship established prior to study commencement?                                                                                      | Page 6 |
| 7.                             | Participant knowledge of the interviewer | What did the participants know about the researcher? <i>e.g. personal goals, reasons for doing the research</i>                                  | Page 6 |
| 8.                             | Interviewer characteristics              | What characteristics were reported about the interviewer/facilitator? <i>e.g. Bias, assumptions, reasons and interests in the research topic</i> | Page 6 |
| <b>Domain 2: study design</b>  |                                          |                                                                                                                                                  |        |



1  
2  
3  
4  
5  
6  
7  
8  
9  
10  
11  
12  
13  
14  
15  
16  
17  
18  
19  
20  
21  
22  
23  
24  
25  
26  
27  
28  
29  
30  
31  
32  
33  
34  
35  
36  
37  
38  
39  
40  
41  
42  
43  
44  
45  
46

Theoretical  
framework

|    |                                       |                                                                                                                                                                 |        |
|----|---------------------------------------|-----------------------------------------------------------------------------------------------------------------------------------------------------------------|--------|
| 9. | Methodological orientation and Theory | What methodological orientation was stated to underpin the study? <i>e.g. grounded theory, discourse analysis, ethnography, phenomenology, content analysis</i> | Page 5 |
|----|---------------------------------------|-----------------------------------------------------------------------------------------------------------------------------------------------------------------|--------|

Participant selection

|     |          |                                                                                           |        |
|-----|----------|-------------------------------------------------------------------------------------------|--------|
| 10. | Sampling | How were participants selected? <i>e.g. purposive, convenience, consecutive, snowball</i> | Page 5 |
|-----|----------|-------------------------------------------------------------------------------------------|--------|

|     |                    |                                                                                    |        |
|-----|--------------------|------------------------------------------------------------------------------------|--------|
| 11. | Method of approach | How were participants approached? <i>e.g. face-to-face, telephone, mail, email</i> | Page 5 |
|-----|--------------------|------------------------------------------------------------------------------------|--------|

|     |             |                                          |        |
|-----|-------------|------------------------------------------|--------|
| 12. | Sample size | How many participants were in the study? | Page 7 |
|-----|-------------|------------------------------------------|--------|

|     |                   |                                                                 |        |
|-----|-------------------|-----------------------------------------------------------------|--------|
| 13. | Non-participation | How many people refused to participate or dropped out? Reasons? | Page 7 |
|-----|-------------------|-----------------------------------------------------------------|--------|

Setting

|     |                            |                                                                   |        |
|-----|----------------------------|-------------------------------------------------------------------|--------|
| 14. | Setting of data collection | Where was the data collected? <i>e.g. home, clinic, workplace</i> | Page 6 |
|-----|----------------------------|-------------------------------------------------------------------|--------|

|     |                              |                                                                   |        |
|-----|------------------------------|-------------------------------------------------------------------|--------|
| 15. | Presence of non-participants | Was anyone else present besides the participants and researchers? | Page 7 |
|-----|------------------------------|-------------------------------------------------------------------|--------|

|     |                       |                                                                                          |          |
|-----|-----------------------|------------------------------------------------------------------------------------------|----------|
| 16. | Description of sample | What are the important characteristics of the sample? <i>e.g. demographic data, date</i> | Page 6-7 |
|-----|-----------------------|------------------------------------------------------------------------------------------|----------|

## Data collection

|     |                        |                                                                               |            |
|-----|------------------------|-------------------------------------------------------------------------------|------------|
| 17. | Interview guide        | Were questions, prompts, guides provided by the authors? Was it pilot tested? | Appendix 1 |
| 18. | Repeat interviews      | Were repeat interviews carried out? If yes, how many?                         | NA         |
| 19. | Audio/visual recording | Did the research use audio or visual recording to collect the data?           | Page 6     |
| 20. | Field notes            | Were field notes made during and/or after the interview or focus group?       | NA         |
| 21. | Duration               | What was the duration of the interviews or focus group?                       | Page 7     |
| 22. | Data saturation        | Was data saturation discussed?                                                | Page 6     |
| 23. | Transcripts returned   | Were transcripts returned to participants for comment and/or correction?      | Page 7     |

**Domain 3: analysis and findingsz**

## Data analysis

|     |                       |                                      |        |
|-----|-----------------------|--------------------------------------|--------|
| 24. | Number of data coders | How many data coders coded the data? | Page 6 |
|-----|-----------------------|--------------------------------------|--------|

1  
2  
3  
4  
5  
6  
7  
8  
9  
10  
11  
12  
13  
14  
15  
16  
17  
18  
19  
20  
21  
22  
23  
24  
25  
26  
27  
28  
29  
30  
31  
32  
33  
34  
35  
36  
37  
38  
39  
40  
41  
42  
43  
44  
45  
46

|           |                                |                                                                                                                                          |                      |
|-----------|--------------------------------|------------------------------------------------------------------------------------------------------------------------------------------|----------------------|
| 25.       | Description of the coding tree | Did authors provide a description of the coding tree?                                                                                    | NA                   |
| 26.       | Derivation of themes           | Were themes identified in advance or derived from the data?                                                                              | Page 6               |
| 27.       | Software                       | What software, if applicable, was used to manage the data?                                                                               | Page 6               |
| 28.       | Participant checking           | Did participants provide feedback on the findings?                                                                                       | Page 7               |
| Reporting |                                |                                                                                                                                          |                      |
| 29.       | Quotations presented           | Were participant quotations presented to illustrate the themes / findings? Was each quotation identified? e.g. <i>participant number</i> | Table 1 & pages 8-12 |
| 30.       | Data and findings consistent   | Was there consistency between the data presented and the findings?                                                                       | Page 6               |
| 31.       | Clarity of major themes        | Were major themes clearly presented in the findings?                                                                                     | Figure 1             |
| 32.       | Clarity of minor themes        | Is there a description of diverse cases or discussion of minor themes?                                                                   | Pages 8-12           |

# BMJ Open

## The benefits of the 'village': a qualitative exploration of the patient experience of COPD in rural Australia

|                                 |                                                                                                                                                                                                                                                                                |
|---------------------------------|--------------------------------------------------------------------------------------------------------------------------------------------------------------------------------------------------------------------------------------------------------------------------------|
| Journal:                        | <i>BMJ Open</i>                                                                                                                                                                                                                                                                |
| Manuscript ID                   | bmjopen-2019-030953.R2                                                                                                                                                                                                                                                         |
| Article Type:                   | Original research                                                                                                                                                                                                                                                              |
| Date Submitted by the Author:   | 22-Aug-2019                                                                                                                                                                                                                                                                    |
| Complete List of Authors:       | Glenister, Kristen; University of Melbourne Faculty of Science, Department of Rural Health<br>Haines, Helen; University of Melbourne Faculty of Science, Department of Rural Health<br>Disler, Rebecca; University of Melbourne Faculty of Science, Department of Rural Health |
| <b>Primary Subject Heading</b>: | Respiratory medicine                                                                                                                                                                                                                                                           |
| Secondary Subject Heading:      | Patient-centred medicine                                                                                                                                                                                                                                                       |
| Keywords:                       | Chronic airways disease < THORACIC MEDICINE, PRIMARY CARE, QUALITATIVE RESEARCH                                                                                                                                                                                                |
|                                 |                                                                                                                                                                                                                                                                                |

SCHOLARONE™  
Manuscripts

1  
2  
3 1 **TITLE:** The benefits of the ‘village’: a qualitative exploration of the patient experience of  
4  
5  
6 2 COPD in rural Australia

7  
8 3 **Running title: COPD management in a rural setting**  
9

10 4  
11  
12 5 **Authors**

13  
14 6 Glenister, Kristen<sup>a</sup>, Haines, Helen<sup>a</sup>, Disler, Rebecca<sup>a</sup>  
15

16 7 **Affiliations**

17  
18 8 a. Department of Rural Health, Faculty of Medicine, Dentistry and Health  
19  
20 9 Sciences | University of Melbourne  
21

22  
23 10 Corresponding Author:

24  
25 11 Dr Kristen Glenister

26  
27 12 Research Fellow, Rural Chronic Ill Health

28  
29 13 Department of Rural Health

30  
31 14 ‘The Chalet’

32  
33 15 Docker Street, Wangaratta, 3677.

34  
35 16 Australia

36  
37 17 +61 3 5823 4532

38  
39 18 [kristen.glenister@unimelb.edu.au](mailto:kristen.glenister@unimelb.edu.au)

40  
41 19 Twitter: [@kristenglenist1](https://twitter.com/kristenglenist1), [@HelenHaines1](https://twitter.com/HelenHaines1), [@RebeccaDisler](https://twitter.com/RebeccaDisler)  
42  
43  
44 20

45  
46 21 **Author contributions:** (1) the conception and design of the study, or acquisition of data, or  
47  
48 22 analysis and interpretation of data: KG, HH, RD, (2) drafting the article or revising it critically  
49  
50 23 for important intellectual content: KG, HH, RD, (3) final approval of the version to be submitted:  
51  
52 24 KG, HH, RD.  
53

54 25  
55 26  
56  
57  
58  
59  
60

1  
2  
3 27 **ABSTRACT**  
4

5 28 **TITLE:** The benefits of the 'village': a qualitative exploration of the patient experience of COPD  
6  
7  
8 29 in rural Australia  
9

10 30 **Objectives:** This study sought to explore patients' experiences of living with, and adapting to, COPD in  
11  
12 31 the rural context. Specifically, our research question was 'What are the barriers and facilitators to  
13  
14 32 living with and adapting to COPD in rural Australia?'

15  
16  
17 33 **Design:** Qualitative, semi-structured interviews. Conversations were recorded, transcribed verbatim  
18  
19 34 and analysed using thematic analysis following the consolidated criteria for reporting qualitative  
20  
21 35 research (COREQ) guidelines.  
22

23  
24 36 **Setting:** Patients with COPD, admitted to a sub-regional hospital in Australia were invited to  
25  
26 37 participate in interviews between October and November 2016.  
27

28 38 **Main outcome measures:** Themes were identified that assisted with understanding of the barriers  
29  
30 39 and facilitators to living with, and adapting to, COPD in the rural context.  
31

32  
33 40 **Results:** Four groups of themes emerged: *Internal Facilitators* (coping strategies; knowledge of when  
34  
35 41 to seek help) and *External Facilitators* (centrality of a known doctor; health team 'going above and  
36  
37 42 beyond'; and social supports) and *Internal/External Barriers to COPD self-management* (loss of identity,  
38  
39 43 lack of access and clear communication, socio-cultural challenges), that were moderated by feelings  
40  
41 44 of inclusion or isolation in the rural community or 'village'.  
42  
43

44 45 **Conclusions:** Our findings suggest that community inclusion enhances patients' ability to cope and  
45  
46 46 ultimately self-manage COPD. This is facilitated by living in a supportive 'village' environment, and  
47  
48 47 included a central, known doctor and a healthcare team willing to go 'above and beyond'.  
49  
50 48 Understanding, or supplementing, these social networks within the broader social structure may assist  
51  
52 49 people to manage chronic disease, regardless of rural or metropolitan location.  
53  
54

55  
56 50 **Key words (4-10):** Chronic obstructive pulmonary disease; general practice; rural; self-management;  
57  
58 51 qualitative.  
59  
60

1  
2  
3 52 **Strengths and Limitations:**  
4

- 5 53 • This study utilised qualitative methodology to provide an in depth exploration of the patient  
6  
7 experience.  
8 54  
9  
10 55 • The design followed the Consolidated criteria for reporting qualitative research (COREQ)  
11  
12 56 guidelines.  
13  
14 57 • Thematic analysis allowed for synthesis focused on a phenomenon of interest and provided a  
15  
16 transparent method that actively sought to remain close to the primary data and avoid over  
17 58  
18 analysis.  
19 59  
20  
21 60 • Transparency of method, the use of independent investigators, and group discussion were  
22  
23 61 used to promote the validity of findings, rigor and trustworthiness of the synthesis process.  
24  
25  
26 62 • This study was undertaken at a single site with a sample of people who had been hospitalised  
27  
28 63 with COPD in the preceding 12 months. In line with a qualitative approach, this did provide  
29  
30 64 important insight the experiences of this group, but may not reflect the experiences of people  
31  
32 65 with COPD from different contexts.  
33  
34  
35  
36  
37  
38  
39 68  
40  
41  
42  
43  
44  
45  
46  
47  
48  
49  
50  
51  
52  
53  
54  
55  
56  
57  
58  
59  
60

## 69 INTRODUCTION

70 Chronic obstructive pulmonary disease (COPD) is a chronic condition characterised by non-reversible  
71 airways obstruction, cough, phlegm and dyspnoea.(1) COPD is the fourth leading cause of death  
72 globally.(2, 3) Social costs include significant disability, poor physical functioning, social isolation and  
73 caregiver burden.(4) Disease trajectory involves progressive deterioration of lung function, decreasing  
74 quality of life, and increasing acute exacerbation frequency and hospitalisation.(5, 6) Management of  
75 COPD is complex and patients often live with multiple comorbid conditions and may have poor mental  
76 health.(7, 8) Optimal care of COPD is founded on seamless, integrated, patient-centred care delivered  
77 by a multidisciplinary team with an emphasis on self-management.(9) Engagement with self-  
78 management is associated with decreased hospital readmission (10) and increased quality of life.(11)  
79 However, research suggests that less than half of patients with COPD will achieve effective self-  
80 management, with younger patients and those living with others more able to address the complex  
81 disease management requirements.(10) Early access to specialist care enhances support for  
82 coordination and self-management of COPD in primary care,(12) with good relationships with health  
83 professionals facilitating navigation through the health system and a positive perception of quality of  
84 health care.(13)

85  
86 In the rural context, workforce constraints restrict access to multidisciplinary, specialist providers,  
87 with care more likely to be delivered by smaller, more generalist teams. A qualitative study in New  
88 Zealand found that care pathways for COPD care in rural contexts were unclear and poorly  
89 coordinated.(12) A recent study in the United States found that although access to diagnostic testing  
90 and specialists was restricted in rural clinics, quality and patterns of healthcare were similar for COPD  
91 between urban and rural clinics.(14) In a rural Canadian study, long-term relationships with general  
92 practitioners, community support and personalised care helped to overcome issues of restricted  
93 specialist access in COPD care.(15) In the Australian context, a study found that self-monitoring of  
94 symptoms and support from health professionals assisted patients to manage breathing difficulties



1  
2  
3 95 and avoid emergency department presentations.(16) Social inclusion and a sense of belonging in COPD  
4  
5 96 has been shown to influence a person's experience of living with COPD (17, 18). The idea of a social  
6  
7 97 connectedness through a supportive 'village' has been used to describe a diversity of social networks  
8  
9  
10 98 and supports in contexts such as maternal and child health (19) and more recently in healthy ageing  
11  
12 99 through the 'aging-in-place' movement (20, 21). While the 'village' concept has not been used to  
13  
14 100 describe supports in COPD, there is a clear recognition of the benefit of a sense of belonging and the  
15  
16 101 importance of social support, from a variety of sources, in this context (17, 18). What is not well  
17  
18 102 understood is the experience of living with COPD and social connectedness in the rural context.  
19  
20  
21 103 Literature has pointed to a high degree of social capital within rural communities and inclusion of  
22  
23 104 those who belong within social networks,(22) with the converse for those who do not experience this  
24  
25 105 inclusion.(23) Following, a review of qualitative research into chronic disease management in rural  
26  
27 106 areas across North America, Europe, Australia and New Zealand found that the rural environment  
28  
29 107 offered several positive aspects, namely personalised care, clinicians being better positioned to  
30  
31 108 provide patient centred care and increased community belonging which could counteract vulnerability.  
32  
33  
34 109 (24)  
35  
36  
37 110  
38  
39 111 Rural studies focussed on the experience of COPD from a patient's perspective are uncommon. This  
40  
41 112 study has sought to explore patient perspectives of living with and adapting to COPD in the rural  
42  
43 113 Australian context. Understanding patient perspectives on current barriers and facilitators will inform  
44  
45 114 rural workforce and care structure planning.  
46  
47  
48 115

## 116 **Methods:**

### 118 **Design**

119 Qualitative study using semi-structured interviews following the Consolidated criteria for reporting  
120 qualitative research (COREQ) guidelines.(25) Thematic analysis was chosen as it allowed for synthesis

1  
2  
3 121 focused on a phenomenon of interest;(26) this being the experience of living with and adapting to  
4  
5 122 COPD in the rural context. Thematic analysis is also is a transparent method that actively seeks to  
6  
7 123 remain close to the primary data and avoids over analysis.(27)  
8  
9

10 124

### 11 125 **Sample and setting**

12 126 A convenience sample of patients admitted to a sub-regional Australian hospital (Northeast Health  
13  
14 127 Wangaratta) with a primary diagnosis of COPD in the preceding twelve months (n=21 patients) were  
15  
16 128 invited to participate in a health service survey, and indicated at the end of the survey if they were  
17  
18 129 willing to be contacted by the investigators to participate in interviews to explore patient perspectives  
19  
20 130 of living with and adapting to COPD in the rural context. This paper presents the data from those  
21  
22 131 interviews. Data on disease severity was not collected, however all participants had required an acute  
23  
24 132 admission for their COPD in the previous 12 months. In this setting, people with COPD are typically  
25  
26 133 managed by General Practitioners, with or without a Generalist Physician, and some are supported by  
27  
28 134 community allied health services including physiotherapy, occupational therapy and social work in a  
29  
30 135 pulmonary rehabilitation programme. Northeast Health Wangaratta is an approximately 200 bed  
31  
32 136 public hospital that services a catchment of 90 000 people. Approximately seven General/Consultant  
33  
34 137 Physicians work in the two larger townships in the catchment (Wangaratta and Benalla) along with 1.2  
35  
36 138 GPs per 1000 population, which is equivalent to the state average. (28, 29) It is common in chronic  
37  
38 139 disease that patients work in a dyad with their caregivers, such as their marital partner, in managing  
39  
40 140 their condition (30). In acknowledging this, the investigators allowed caregivers to be present during  
41  
42 141 interviews, if the patient participant desired, and these caregivers were allowed to provide additional  
43  
44 142 comments as explanation of the topics raised and discussed by the patient participant themselves. All  
45  
46 143 caregiver participants were consented prior to discussion.  
47  
48  
49  
50  
51  
52  
53  
54  
55

144

### 145 **Data collection**

146 Semi-structured questions were developed in consultation with experts in the field of chronic illness

1  
2  
3 147 and community health care. The questions sought to explore patient experiences of care coordination  
4  
5 148 and living with COPD in the rural context, and are listed as Appendix 1. Potential participants were  
6  
7 149 sent an invitation letter by the hospital following discharge. Interviews undertaken at a location  
8  
9  
10 150 chosen by the participant. The female interviewer (KG, PhD ) had training in interviewing techniques  
11  
12 151 and experience in chronic disease management and health care delivery research. The interviewer  
13  
14 152 had no prior or ongoing relationship with the participants. Interviews were audio-recorded and  
15  
16 153 transcribed verbatim. Names of people and pets were changed to increase anonymity of participants.  
17  
18  
19 154 No additional data is available.

### 20 21 155 **Data analysis**

22  
23 156 Thematic synthesis was completed in three stages by two or more authors. (27, 31, 32) All data were  
24  
25 157 entered into NVivo11 QSR®, followed by line-by-line free coding of primary data (Stage 1) (two  
26  
27 158 researchers). Free codes were then organised into descriptive themes (Stage 2), with confirmation of  
28  
29 159 themes through discussion (two researchers).(27, 31, 32) Random selection of data extracts by a third  
30  
31 160 independent researchers ensured trustworthiness of the data coding and themes, with disagreements  
32  
33 161 resolved through discussion.(27, 31, 32) Lastly, central emergent analytical themes were developed  
34  
35 162 through group discussion (Stage 3) to provide a broader understanding and meaning to the data within  
36  
37 163 the context of patient's experiences of care coordination and living with COPD in the rural Australian  
38  
39 164 context (three researchers).(27, 31, 32) Transparency of method, the use of independent investigators,  
40  
41 165 and group discussion were used to promote the validity of findings, rigor and trustworthiness of the  
42  
43 166 synthesis process.(27, 31, 32) Reflection was actively sought through discussion to minimise bias and  
44  
45 167 come to agreement as to data saturation.(33) All patients who indicated that they were interested in  
46  
47 168 participating were interviewed. By the conclusion of the final interview no new themes had emerged.  
48  
49 169 The final themes, with quotes for illustrative purposes are summarised in table 1.  
50  
51  
52  
53  
54  
55 170

### 56 57 171 **Ethics approval**

58  
59 172 Ethics approval was granted by the Northeast Health Wangaratta Human Research Ethics Committee  
60

1  
2  
3 173 (project 175, August 2016). Signed, informed consent was obtained from each interviewee.  
4  
5  
6 174

7  
8 175 **Patient and Public Involvement statement**  
9

10 176 This research involved patient interviews. Patients were not invited to comment on the study design  
11  
12 177 and were not consulted to develop patient relevant outcomes or interpret the results. Patients were  
13  
14 178 not invited to contribute to the writing or editing of this document for readability or accuracy. We will  
15  
16 179 disseminate results to study participants.  
17  
18

19 180

20  
21 181 **Transparency declaration:**  
22

23 182 The lead author affirms that this manuscript is an honest, accurate and transparent account of the  
24  
25 183 study being reported and that no important aspects of the study have been omitted, and that any  
26  
27 184 discrepancies from the study have been explained.  
28  
29

30 185

31  
32 186 **RESULTS**  
33

34 187 Fourteen people with COPD indicated that they would be happy to be contacted by study investigators  
35  
36 188 and all consented to participate in the interviews. If the patient participant desired, caregivers (n=4)  
37  
38 189 were present during the interviews and provided explanatory comments as to the topics raised by the  
39  
40 190 patient participants. No participants dropped out of the study. Interviews were undertaken between  
41  
42 191 October and November 2016, with a duration of 19 to 77 minutes.  
43  
44  
45

46 192

47  
48 193 **Facilitators and barriers to COPD self-management in the rural context**  
49

50 194 Thematic analysis resulted in four groups of themes that influenced whether a person with COPD was  
51  
52 195 able to adapt to and ultimately self-manage their condition in the rural context, including: *Internal*  
53  
54 196 *Facilitators* (coping strategies; knowledge of when to seek help), *External Facilitators* (centrality of a  
55  
56 197 known doctor; health team 'going above and beyond'; and social supports), *Internal Barriers* (loss of  
57  
58 198 identity) and *External Barriers* (lack of access and clear communication, socio-cultural challenges).  
59  
60

1  
2  
3 199 These themes were furthermore moderated by feelings of 'inclusion' (feeling welcomed in the  
4  
5 200 community) or 'isolation' (feeling emotionally separate from others in the community) within the rural  
6  
7 201 context. These findings are summarised in Figure 1. Ability to adapt to the 'new normal' of life with  
8  
9 202 COPD and self-manage COPD could be considered as a spectrum from positive (adaptation to the new  
10  
11 203 normal with effective self-management) to negative (inability to adapt or self-manage).  
12  
13  
14 204

### 17 205 **Internal Facilitators to COPD self-management**

20 206 Internal facilitators that emerged from analysis were the development of coping strategies and  
21  
22 207 learning when to seek help in the context of COPD self-management.  
23  
24  
25 208

#### 27 209 ***Coping strategies:***

29 210 Learning to cope was a key theme with a matter of fact and 'making the best of things' approach taken  
30  
31 211 to this new condition: *I didn't get depressed about (COPD diagnosis) or anything ... I thought well*  
32  
33 212 *you've got it, you've got to live with it* (Participant (P)1). Adaptation to a new normal occurred through  
34  
35 213 learning coping strategies and accepting a new pace of life: *'You have to perform at the rate your lungs*  
36  
37 214 *will let you. So you get slower and slower, year-by-year.'*(P11) Specific approaches were used to  
38  
39 215 manage symptom fluctuations, with one participant voicing: *'Quite often I get attacks... during the*  
40  
41 216 *night if the temperature drops suddenly... But I can control that quite often - I get up and make a cup*  
42  
43 217 *of coffee and sit up in the chair ... then I go back to bed and I'm alright the next morning'*. Others  
44  
45 218 discussed how they learnt how to retain activities that gave them joy: *'...we did a lot of dancing and if*  
46  
47 219 *I got really hot I'd have to go out of the hall into the fresh air ... I'd go out there and I could settle my*  
48  
49 220 *breathing down.'* (P1).  
50  
51  
52  
53  
54 221

#### 56 222 ***Knowing when to seek help***

58 223 Development of knowledge in how and when to seek help also facilitated adaptation and capacity for  
59  
60

1  
2  
3 224 self-management. Training in seeking help without delay was voiced as important to avoiding acute  
4  
5 225 deterioration: *'Well; self-management, from what they've told me and what they've taught me, is to*  
6  
7 226 *live as comfortably as you can with your disease you've got and don't "buggerise around if you get*  
8  
9 227 *crook" [delay if you get sick].'*(P10). Recognising deterioration was important: *'You're either on a high*  
10  
11 228 *or you're on a low. You can feel yourself going down.'*(P13), as was knowing when to access emergency  
12  
13 229 services: *'Well if it gets to the stage where he can't breathe properly - into the hospital. That's just*  
14  
15 230 *what we do'* (caregiver of P5).

18 231

20 232

23 233 **External Facilitators to COPD self-management**

24  
25 234 External facilitators related to the centrality of a known doctor; the health team going 'above and  
26  
27 235 beyond' and social support.

29 236

31 237 **Centrality of known doctor**

32  
33 238 Continuity of care with practitioners led to supportive long-term relationships: *'He's (GP) my rock'* (P9)  
34  
35 239 and *'if (doctor) were to leave and go somewhere else I don't know what I'd do.'*(P3). Coordination  
36  
37 240 between health members was also raised as important: *'with different things she'd (GP) say 'I'll ring*  
38  
39 241 *(the patient's physician) and talk to her about it. So they worked hand in hand'* (P12). Integration of  
40  
41 242 health professionals within the community also facilitated trust and confidence for patients to express  
42  
43 243 their needs: *'(Doctor) happened to be one of my neighbours.... He asked 'how is Rufus (my dog)? How*  
44  
45 244 *are you going? He even said 'what's your wife doing? Your clothesline is chock-a-block (full) every day'.*  
46  
47 245 *Then he started talking, he says 'What is it?' I said, 'look mate, I'm not happy, I want to go home'* (P7).  
48  
49 246 Rural workforce shortages can inhibit urgent care, however those with established relationships were  
50  
51 247 accorded access: *'He said to me, if ever I can't get in, tell them I've got to see him'*(P9), similarly another  
52  
53 248 patient voiced: *'I talk to the girls at the counter and I've got to book in three months ahead. I said I'm*  
54  
55 249 *not booking into you for three months ahead - I said I'll ring you ... she puts me in every time'*(P13).  
56  
57  
58  
59  
60

1  
2  
3 250  
45 251 **Health team going 'above and beyond'**

6  
7 252 Throughout the interviews participants provided examples of when health professionals had gone  
8  
9  
10 253 'above and beyond' to provide support, from simple presence: *'while I was in hospital (doctor) came*  
11  
12 254 *in nearly every day and he didn't have to'*(P13), to assisting with community access: *'(Doctor) came*  
13  
14 255 *'round to my place and sat down with my medications. She took them up to the chemist herself and*  
15  
16 256 *got them put into a Webster pack (Dosette-box)'*(P8). Several doctors went as far as providing their  
17  
18 257 private contact details: *'We had to see (doctor) before we went on holiday and she'd give us her mobile*  
19  
20 258 *number and "if anything happens, call me straight away"'* (P11). Assistance with policy constraints  
21  
22 259 were also noted, these little and kind adjustments were keenly felt by participants: *'They let us sneak*  
23  
24 260 *through the door which brought us right in. Words cannot explain how great they were. We were so*  
25  
26 261 *comfortable with all the staff that we could have asked them anything'* (P9).

27  
28  
29  
30 26231  
32 263 **Social support**

33  
34 264 Community supports created the sense of an 'inclusive village', with non-health workers, such as bus  
35  
36 265 drivers, supporting participants to be independent: *'They're great. They lift me up on the thing*  
37  
38 266 *(disability access ramp) because I've got the oxygen'*(P6). Family and caregiver support were also  
39  
40 267 clearly articulated, both in day-to-day care, but also with logistical challenges: *'The other night the*  
41  
42 268 *power went off. So that's when you really need somebody ... you've got to go and get an oxygen bottle*  
43  
44 269 *and set it up to breathe.'*(P6). Caregiver support extended to recognition of symptoms and decision-  
45  
46 270 making, as well as recognising when to pace activities: *'(She) will pick very quickly if I'm tiring. You*  
47  
48 271 *never say stop ... Just one more thing'* (P11).

49  
50  
51  
52 272 Similarly, peer support was also raised in the context of community through pulmonary rehabilitation:  
53  
54 273 *(Pulmonary rehabilitation) is amazing. Number 1, you go there for exercises. Number 2- beautiful to*  
55  
56 274 *sit there and talk to the next person. They all got similar things ... We just listen to one another and*  
57  
58 275 *then naturally crack up a joke or something ... We look after one another.*(P7)  
59  
60

1  
2  
3 276  
45 277 **Internal Barriers to self-management of COPD**6  
7 278 Loss of identity, lack of access and clear communication and socio-economic and cultural challenges8  
9 279 were raised as the key barriers to self-management to COPD in the rural context.  
10  
11

12 280

13 281

14 282 **Loss of Identity**15  
16 283 Participants expressed a loss of identity and the associated psychological impact, particularly through17 284 changed work-life role: *'I was forced to retire. I didn't like the idea of it. I was depressed'* (P7). This was18 285 also expressed as loss of something that brought joy: *'I was that wrecked (by having to retire). It was*19 286 *unbelievable. I don't think that anybody would have loved their jobs as much I loved mine'* (P8).20 287 Emotional distress was also connected with the unrelenting nature of the condition: *'I thought, this is*21 288 *not worth it. What's the use in living when you suffer like this even though my mind is clear and*22 289 *everything?'* (P7). One caregiver also expressed distress at seeing the progressive decline and impact:23 290 *'He was deteriorating before my eyes. He also suffered depression because of all this pain'* (caregiver

24 291 of P13).

25 292

26 293 **External Barriers to self-management of COPD**27 294 **Lack of access and clear communication**

28 295 Issues of staff retention in the rural workforce raised barriers to continuity of care and effective

29 296 communication: *'You don't even get to know (the GPs), 18 months and they're gone'* (P14). Reduced30 297 numbers of health professionals also caused delays in access: *'I could only access her every six weeks*31 298 *at the least. You could never get her if you were sick.'*(P3) Similarly, limited alternatives left some32 299 participants to rely on emergency services: *'I've gone down to see a doctor, and I've clashed, or*33 300 *whatever. So they've rang an ambulance and said, go to hospital.'*(P8). Communication with unfamiliar34 301 clinicians also at times left some participants feeling in the dark: *'I was in hospital two weeks ago and*

35 60



1  
2  
3 302 *it wasn't until a week after I got out, with my GP, that I actually found out what was the matter with*  
4  
5 303 *me' (P4).The need to continually re-tell their story was also a frustration when health professionals*  
6  
7 304 *appeared to not communicate with one another:*

9  
10 305 *'there's been a few times where I've gone to emergency. You explain the situation - like, you're*  
11  
12 306 *having trouble breathing as it is. They're trying to say oh, how long have you been like this for?*  
13  
14 307 *Have [they] got any medical records? You'll see what's the matter with me is! And then the*  
15  
16 308 *next doctor comes in for the next shift - they say oh, what are you here for? Talk to each other*  
17  
18 309 *instead of having to ask the patients.'* (P8).

20  
21 310

22  
23 311

24  
25 312 **Socio-cultural challenges**

26  
27 313 In contrast to those who voiced positive social inclusion; others expressed social isolation: *I wasn't*  
28  
29 314 *coping. I wasn't well enough to do my own food preparation ... I'm fairly new and I'm not a local - I*  
30  
31 315 *didn't know anyone so you don't like asking someone' (P14). In contrast to those afforded access*  
32  
33 316 *through established relationships, participants newly arrived felt disconnected from support:*

34  
35 317 *'The community clinic was the one that I accessed because they HAD TO take new patients.*  
36  
37 318 *That was my only avenue at the time ... I needed to access somebody who knew me because*  
38  
39 319 *[COPD] doesn't go by the record sort of thing ... when you get sick, you're sick enough to need*  
40  
41 320 *care straight away'.*(P14)

42  
43 321 Financial impact was raised several times, with participants having to balance treatments choices as  
44  
45 322 *well as resource choices to stay well: 'We chose to increase the temperature of the house by a few*  
46  
47 323 *degrees. It's just another cost' (P11). The requirement to replace the stove for oxygen therapy safety*  
48  
49 324 *was an added burden, and support for such measures was perceived to be influenced by social*  
50  
51 325 *circumstance: 'If you were living in Housing Commission you would be subsidised, but because we were*  
52  
53 326 *(self-funded retirees) ... nothing'.*(P6).

54  
55 327

**DISCUSSION:**

This study explored patient experiences of living with and managing COPD in the rural context. Our results suggested that community inclusion, or inclusion in the 'village' context, moderated adaptation to a 'new normal' of living with COPD, and enhanced a person's ability to cope and ultimately self-manage their condition. Community inclusion also influenced whether a person experienced either a net balance of positive *facilitators* (knowledge of coping strategies and when to seek help, a central, known doctor, a health care team 'going above and beyond', social supports) or more pronounced balance of net negative *barriers* (loss of identity, lack of communication between health care team, socioeconomic or cultural disadvantage) to living with and managing COPD. The factors experienced by this rural population are highly relevant to people living in a variety of settings, including urban and suburban environments. However, the impact of these factors may be amplified in rural communities where there may be constrained choice and access to community support providers. Supportive social networks and a sense of 'place' are linked to decreased COPD readmission and are recognised as being strong and highly valued in rural areas (34).

The benefits of social connection, social support, living with a caregiver, and peer support through pulmonary rehabilitation are well recognised in COPD and have been reported widely in previous literature (17, 35) and are evident in the present study. These benefits have been shown to reduce the likelihood of smoking, increase exercise capacity, reduce emergency department visits and enhance coping.(36, 37) Patients' perceived control over COPD was found to be associated with fewer exacerbations (38). Conversely, loss of identity, (18) poor continuity of care from health professionals, poor communication between members of the health care team,(39) exclusion from social networks, and socioeconomic disadvantage are equally recognised as key barriers.(40) These influences are associated with reduced coping ability, decreased help seeking, (41) the need to continually repeat medical history, and are barriers to develop trusting relationships with health professionals. (42). In comparison with other qualitative Australian studies into the patient's experience of COPD, beneficial

1  
2  
3 354 impacts were reported when patients felt supported by community members and health professionals  
4  
5 355 (34, 43, 44), connected to people and nature (43), felt a strong sense of community (44) and felt  
6  
7 356 listened to by health professionals (45).  
8  
9

10 357  
11  
12 358 The strength of this study is the exploration of a range of medical, emotional and social supports, and  
13  
14 359 the way these impact people living with COPD in the rural context. Our findings suggest that a rural  
15  
16 360 'village' existed for these patients that encompassed supportive health professionals, family, friends  
17  
18 361 and community members, as has been shown in maternal and child health and healthy ageing contexts  
19  
20 362 (19-21). The understandings regarding social connectedness and the benefit of living within a  
21  
22 363 supportive 'village' in a rural context are likely highly relevant to other settings, including urban areas,  
23  
24 364 and could be used to model social supports for others living with COPD . In an urban context, a 'village'  
25  
26 365 could develop within a suburb, block of flats or retirement housing development, or when people have  
27  
28 366 lived in an area for an extended period of time. The extent to which a person living with COPD is  
29  
30 367 included in the 'village' is variable and has a marked influence on coping and self-management ability.  
31  
32 368 Inclusion in the 'village', where one's neighbour could also be one's doctor or where family members  
33  
34 369 were given the GP's private telephone number, was strongly facilitative. There were many examples  
35  
36 370 provided of close, trusting, long term relationships with doctors, health professionals 'going above  
37  
38 371 and beyond', and social supports that enabled COPD management within the rural context. Similarly,  
39  
40 372 self-management of COPD has been depicted as being built upon a pyramid of four categories of  
41  
42 373 people (the patient (at the apex), their partner, their physician and the public's perception of the  
43  
44 374 disease).(46) Perhaps this pyramid also depicts both the source and importance of each category of  
45  
46 375 people to a person living with COPD.  
47  
48  
49  
50  
51

52 376  
53  
54 377 Previous studies have reported that COPD related symptoms and behaviours, such as coughing in  
55  
56 378 public and wearing an oxygen mask, heighten feelings of self-blame due to historical smoking, and  
57  
58 379 have been linked to feelings of loneliness and embarrassment. (17, 18) However, self-blame was not  
59  
60

1  
2  
3 380 a prominent theme in this study, perhaps due to the protective aspects of social 'inclusion' within  
4  
5 381 these established rural communities. Similarly, while much of rural health discourse focuses on deficits  
6  
7 382 in care and experience,(47) and that respiratory care within the explored region is based on a rural  
8  
9  
10 383 generalist model, participants in this study did not speak of 'missing out' on services, information or  
11  
12 384 access to specialists. Sossai and colleagues described several negative factors influencing life with  
13  
14 385 COPD (anxiety, depression, breathing and sleeping difficulties, reduction in daily/social activities and  
15  
16 386 independence) but the impact of the rural context was generally limited to the associated climate(34).  
17  
18  
19 387 Goodridge's commentary on this paper suggested that rural patients with COPD often experienced  
20  
21 388 difficulty accessing self-management support and education (34). The participants in our study may  
22  
23 389 be unaware of other models of care delivered through metropolitan centres, or may believe they were  
24  
25 390 receiving the care that met their needs, or the desire to receive services locally or from familiar people  
26  
27  
28 391 was more important than accessing a different model of care elsewhere. Further research is required  
29  
30 392 to understand this perspective, given the unequivocal evidence that there is a lack of access to  
31  
32 393 specialist services in this and other rural contexts.

33  
34 394  
35  
36 395 This study was undertaken at a single site with a sample of people who had been hospitalised with  
37  
38 396 COPD in the preceding 12 months. As such, it is likely to reflect only those perspectives of people who  
39  
40  
41 397 have been in recent contact with health services and were willing to undertake an interview. However,  
42  
43 398 the strength of this work is that it provides important insights into rural healthcare experience and  
44  
45 399 inclusively explored medical, social and emotional supports in this context.

46  
47  
48 400  
49  
50 401 The results of this study suggest that adaptation, coping and effective self-management are enhanced  
51  
52 402 via a range of medical, emotional and social supports. There is substantial value of pulmonary  
53  
54 403 rehabilitation as a *de facto* community and the benefit of a social 'village' in supporting people with  
55  
56 404 chronic progressive disease. Health professionals may consider assessing patients for level of  
57  
58 405 social/community inclusion and connecting patients with available services in the community. This  
59  
60

1  
2  
3 406 may be of particular importance given the relationship seen between social exclusion and sub-optimal  
4  
5 407 coping.

6  
7 408  
8  
9  
10 409 Social support is known to positively influence psychological health and self-efficacy of people with  
11  
12 410 COPD, however less is known about the benefits this confers on overall quality of life and physical  
13  
14 411 functioning (48) particularly in the rural context. (24) The benefit and experience of living in a  
15  
16 412 supportive 'village' community could be further explored in the urban context to further understand  
17  
18 413 the complexities of non-medical social and emotional support. Furthermore, the patient perspective  
19  
20 414 of coping strategies and self-management approaches could be used to inform more user-friendly  
21  
22 415 education material to address the recognised poor knowledge and understanding of COPD.(49)  
23  
24  
25  
26  
27

## 28 417 **CONCLUSION**

29  
30 418 In this study, the rural context offered an advantage for the people with COPD who experienced  
31  
32 419 inclusion (in the 'village'), with the centrality of a known doctor and a health professional team willing  
33  
34 420 to go 'above and beyond' key to this positive experience. Evidence of the benefit of strong social and  
35  
36 421 family supports were noted, in line with prior studies. Understanding barriers and facilitators to  
37  
38 422 supported COPD self-management will help inform future rural workforce and service development.  
39  
40 423 Further research is needed to understand how social networks within the broader social structural  
41  
42 424 conditions influence the way in which patients live with and manage their disease, and to compare  
43  
44 425 experiences of COPD in rural and urban contexts.  
45  
46  
47

48 426  
49  
50 427 **Acknowledgements:** We wish to thank the participants of this study and staff at the recruiting sites.  
51  
52 428 We sincerely thank the team involved in the Managing Chronic Disease in Wangaratta and Benalla  
53  
54 429 project, in particular Tessa Archbold, Megan Tharratt, Jan Lang, Tammie Long and David Kidd.  
55  
56

## 57 430 **Data sharing statement:**

58  
59 431 All data relevant to the study are included in the article or uploaded as supplementary information.  
60

1  
2  
3 432 **Conflicts of interest:** None declared  
4

5 433 **Funding:** This research did not receive any specific grant from funding agencies in the public,  
6  
7 434 commercial or not-for-profit sectors. The authors are supported by the Australian Government  
8  
9 435 Department of Health through the Rural Health Multidisciplinary Training Programme.  
10  
11

12 436  
13  
14  
15  
16  
17  
18  
19  
20  
21  
22  
23  
24  
25  
26  
27  
28  
29  
30  
31  
32  
33  
34  
35  
36  
37  
38  
39  
40  
41  
42  
43  
44  
45  
46  
47  
48  
49  
50  
51  
52  
53  
54  
55  
56  
57  
58  
59  
60

For peer review only

Table 1: Example of analysis process and illustrative quotes

|                       | Category                  | Sub-category                             | Code                                   | Condensed meaning unit                                                                  | Meaning unit                                                                                                                                                                                                                                                                                                                                                                         |
|-----------------------|---------------------------|------------------------------------------|----------------------------------------|-----------------------------------------------------------------------------------------|--------------------------------------------------------------------------------------------------------------------------------------------------------------------------------------------------------------------------------------------------------------------------------------------------------------------------------------------------------------------------------------|
| Internal facilitators | Coping Strategies         | Individual approaches to self-management | Matter of fact approach to COPD        | Making the best of things                                                               | I didn't get depressed about it (COPD diagnosis) or anything, no, I thought well you've got it, you've got to live with it <b>(P1)</b>                                                                                                                                                                                                                                               |
|                       |                           |                                          | Acceptance of slowed pace.             | There is no problem with her going on the train with the oxygen. It just slows you down | It just slows you down. You have to perform at the rate your heart will let you, and you have to perform at the rate your lungs will let you. So you get slower and slower, year-by-year. <b>(P1)</b>                                                                                                                                                                                |
|                       |                           |                                          | Learning approaches to manage symptoms | But I can control that... I go back to bed and I'm alright the next morning             | There is no problem with her going on the train with the oxygen. So that's not a problem. It's just a matter of putting her on the train and the oxygen will last for eight hours. <b>(P3)</b>                                                                                                                                                                                       |
|                       |                           |                                          | Working to retain activities of joy    | I could settle my breathing down                                                        | Quite often I get attacks - mild attacks - during the night if the temperature drops suddenly and it's cold, and I haven't had the heater on or something enough that can set me off. But I can control that quite often - I get up and make a cup of coffee and sit up in the chair and turn the heating on and then I go back to bed and I'm alright the next morning <b>(P14)</b> |
|                       | Knowing when to seek help | Knowing when to seek help                | Acting on warning signs                | Don't delay if you get unwell                                                           | ...we did a lot of dancing and if I got really hot I'd have to go out of the hall into the fresh air, I felt like I was suffocating in the hall and I'd go out there and I could settle my breathing down by getting the fresh air outside. <b>(P1)</b>                                                                                                                              |
|                       |                           |                                          | Recognising changes                    | You can feel yourself going down                                                        | 'So he still goes out and enjoys that, but he doesn't dance every dance like he used to' <b>(P11)</b>                                                                                                                                                                                                                                                                                |
|                       |                           |                                          |                                        |                                                                                         | Well self-management from what they've told me and what they've taught me is to live as comfortably as you can with what you've got - with your disease you've got and don't buggerise around if you get crook [delay if you get sick]. That's it. <b>(P15)</b>                                                                                                                      |
|                       |                           |                                          |                                        |                                                                                         | You're either on a high or you're low. You can feel yourself going down and I have a boost of prednisolone. I used to have 25 for three days, 12 and a half for three days, and then five for seven days. <b>(P1)</b>                                                                                                                                                                |

Rural COPD management

|                                                                                            |                                           |                                                 |                                                                                        |                                                                                                                                                                                                                   |                                                                                                                                                                                                                                                                                                                                                                                                                                                                                                                                                                                                                                                                                                                                                                                                                                                                                                                                                                                                                                                                                                                                                                                                                                                                                                                                                                                                                                                                                                                                                                              |
|--------------------------------------------------------------------------------------------|-------------------------------------------|-------------------------------------------------|----------------------------------------------------------------------------------------|-------------------------------------------------------------------------------------------------------------------------------------------------------------------------------------------------------------------|------------------------------------------------------------------------------------------------------------------------------------------------------------------------------------------------------------------------------------------------------------------------------------------------------------------------------------------------------------------------------------------------------------------------------------------------------------------------------------------------------------------------------------------------------------------------------------------------------------------------------------------------------------------------------------------------------------------------------------------------------------------------------------------------------------------------------------------------------------------------------------------------------------------------------------------------------------------------------------------------------------------------------------------------------------------------------------------------------------------------------------------------------------------------------------------------------------------------------------------------------------------------------------------------------------------------------------------------------------------------------------------------------------------------------------------------------------------------------------------------------------------------------------------------------------------------------|
| <p style="writing-mode: vertical-rl; transform: rotate(180deg);">External Facilitators</p> | <p>Centrality of a known doctor</p>       | <p>Continuity, trust, and connection</p>        | <p>Central to support and coordination of care</p> <p>Providing access when needed</p> | <p>Central position of support</p> <p>Doctor integrated as part of community</p> <p>You couldn't get an appointment with her because she was booked out all the time</p> <p>Converse impact of lack of access</p> | <p>He's (GP) my rock <b>(P9)</b></p> <p>Well if (doctor) were to leave and go somewhere else I don't know what I'd do. <b>(P3)</b>. 'with different things she'd (GP) say 'I'll ring (doctor 1) and talk to her about it. So they worked hand in hand' <b>(P12)</b>.</p> <p>He happened to be one of my neighbours. He then asked 'how is Rufus (my dog) going? How are you going? He even said 'what's your wife doing? Your clothesline is chock-a-block every day'. Then he started talking, he says 'What is it?' I said, 'look mate, I'm not happy, I want to go home' <b>(P7)</b></p> <p>He said to me, if ever I can't get in, tell them I've got to see him, yes.<b>(P9)</b></p> <p>My GP is really good. I say to her, it's no good me making an appointment with you - I said this quite a while back - because I talk to the girls at the counter there and I've got to book in three months ahead. I said I'm not booking into you for three months ahead. I said I'll ring you and let you know when I'm free. When I'm free....She puts me in every time. <b>(P7)</b></p> <p>They only had the one lady doctor - and she'd been there forever apparently, highly regarded. So I got an appointment with her and she did all these tests on me and checked blood tests and everything. Found out that I was okay as such, and - but I could only access her every six weeks at the least. You could never get her if you were sick. Just because you were sick you couldn't get an appointment with her because she was booked out all the time <b>(P3)</b></p> |
|                                                                                            | <p>Health team going above and beyond</p> | <p>Patients supported with inclusive access</p> | <p>Going the extra mile to accommodate and care for patients</p>                       | <p>Visiting and providing support</p> <p>Giving patients their private number</p> <p>Facilitating access</p>                                                                                                      | <p>while I was in hospital (doctor 2) came in nearly every day and he didn't have to' <b>(P13)</b></p> <p>(Doctor) came round to my place and sat down with my medications. She took them up to the chemist herself and got them put into a (Dosette-box). So I go to the chemist, now, and pick them up in a (Dosette Box). <b>(P8)</b></p> <p>We had to see her (doctor 1) before we went on holiday and she'd give us her mobile number and "if anything happens, call me straight away"<b>(P11)</b></p> <p>Well (wife) went overseas. (Doctor) said well what are you doing? I decided not to come ... I'm going to family. (Doctor) said okay, give the family my number. Here's some extra medication, and this is the instructions if something happens. <b>(P11)</b></p> <p>They let us (daughters of patient with COPD) sneak through the door around the other side, which brought us right in. Words cannot explain how great they were. We were so comfortable with all the staff that we could have asked them anything, every button they pressed on a machine, every tube they played with, they explained to us what they were doing <b>(P9)</b></p>                                                                                                                                                                                                                                                                                                                                                                                                         |



|                   |                  |                                                                                       |                                                                                                                                                       |                                                                                                                                                                                                                                                                 |                                                                                                                                                                                                                                                                                                                                                                                                                                                                                                                                                                                                                                                                                                                                                                                                                                                                                                                                                                                                                                                                                                                                                                                                                                                                                                                                                                                                                                                                                                                                                                                                                                                                                                                                              |
|-------------------|------------------|---------------------------------------------------------------------------------------|-------------------------------------------------------------------------------------------------------------------------------------------------------|-----------------------------------------------------------------------------------------------------------------------------------------------------------------------------------------------------------------------------------------------------------------|----------------------------------------------------------------------------------------------------------------------------------------------------------------------------------------------------------------------------------------------------------------------------------------------------------------------------------------------------------------------------------------------------------------------------------------------------------------------------------------------------------------------------------------------------------------------------------------------------------------------------------------------------------------------------------------------------------------------------------------------------------------------------------------------------------------------------------------------------------------------------------------------------------------------------------------------------------------------------------------------------------------------------------------------------------------------------------------------------------------------------------------------------------------------------------------------------------------------------------------------------------------------------------------------------------------------------------------------------------------------------------------------------------------------------------------------------------------------------------------------------------------------------------------------------------------------------------------------------------------------------------------------------------------------------------------------------------------------------------------------|
|                   | Social support   | Community supports assisting with independence<br><br>Family support                  | Community support independent living and watching over and taking care<br><br>Family support with day to day and in recognising and managing symptoms | The bus drivers are great, they lift me up because I've got oxygen<br><br>He Fell over in the garden one of them lifted him up<br><br>Family provide care and support – day to day and in time of need<br><br>Family assist with recognition of symptom changes | 'When I go up the street on the bus, the bus drivers, they're great. They will lift me up on the thing, because I've got the oxygen, I can lift up and that. At the picture theatre I find, and everywhere I go actually, I find them very good' (P6)<br><br>We get along very well with the maintenance fellows. (Patient with COPD) fell over in the garden out the side and one of the maintenance boys came up, lifted him up' (P5)<br><br>The other night the power went off. So that's when you really need somebody ... you've got to go and get an oxygen bottle and set it up to breathe. (P6).<br><br>Like at one stage what was about 12 of us in there with you (Mum, in Critical Care), (nurses) did not bat an eyelid. They (nurses) could see that the family support was what was keeping her going (daughter of participant 9). (She) helps me put my socks on, tells me to get out of bed. Tells me not to drink too much. General company. It's really what it is. (She) will pick very quickly if I'm tiring. You never say stop. Just one more thing. I get that a lot. So I'm running on the Plimsoll line all the time. Just one more thing, then we'll go home. (P11)<br>Pulmonary rehabilitation also created an important community:<br>Oh my goodness, (pulmonary rehabilitation) is amazing. See, number 1, you go there for exercises. Number 2- beautiful to sit there and talk to the next person. They all got similar things. We're talking about how someone feels shit. Somebody's better, somebody's worse. We just listen to one another and then naturally crack up a joke or something which they said laughter is better than medicine. We look after one another and talk nicely and beautiful.(P7) |
| Internal Barriers | Loss of Identity | Impact of restriction in social worth and contribution<br><br>Impact on mental health | Loss of social role<br><br>Mental health distress over unrelenting condition                                                                          | Forced by COPD into early retirement/ Loss of loved work role<br><br>Living a life of suffering                                                                                                                                                                 | I was that wrecked (by having to give up work due to COPD). It was unbelievable. I don't think that anybody would have loved their jobs as much I loved mine' (P8)<br><br>'I thought, this is not worth it. What's the use in living when you suffer like this even though my mind is clear and everything?' (P7)<br>Oh, my - if I could turn the clock back, every person that told me of the person and the people that were suffering from it, I would listen to the first person and shake the shit away, wouldn't touch it again. (P7)                                                                                                                                                                                                                                                                                                                                                                                                                                                                                                                                                                                                                                                                                                                                                                                                                                                                                                                                                                                                                                                                                                                                                                                                  |

Rural COPD management

|                   |                                        |                                        |                              |                                                                                                           |                                                                                                                                                                                                                                                                                                                                                                                                                                                                                                                                                                                                                                                                                                   |
|-------------------|----------------------------------------|----------------------------------------|------------------------------|-----------------------------------------------------------------------------------------------------------|---------------------------------------------------------------------------------------------------------------------------------------------------------------------------------------------------------------------------------------------------------------------------------------------------------------------------------------------------------------------------------------------------------------------------------------------------------------------------------------------------------------------------------------------------------------------------------------------------------------------------------------------------------------------------------------------------|
| External Barriers | Lack of access and clear communication | Lack of access and clear communication | High staff turnover          | Don't even get to know the GPs, 18 months and they're gone                                                | You don't even get to know (the GPs), 18 months and they're gone (P14)<br>But the new one didn't like (local town) so they left. He was replaced by an equally good one who didn't like (local town) and left. (P3).                                                                                                                                                                                                                                                                                                                                                                                                                                                                              |
|                   |                                        |                                        | Limited alternatives         | I could only access her every six weeks/ I've clashed, they've rang the ambulance and said go to hospital | They only had the one lady doctor - and she'd been there forever apparently, highly regarded. ... but I could only access her every six weeks at the least. You could never get her if you were sick. (P3)                                                                                                                                                                                                                                                                                                                                                                                                                                                                                        |
|                   |                                        |                                        | Lack of communication        | Don't they read the files?                                                                                | I've gone down to see a doctor, and I've clashed, or whatever. So they've rang an ambulance and said, go to hospital (P8)<br>I was in hospital two weeks ago and it wasn't until a week after I got out with my GP that I actually found out what was the matter with me'. (P14)                                                                                                                                                                                                                                                                                                                                                                                                                  |
|                   |                                        |                                        | Having to repeatedly explain | The next doctor comes in, you've got to explain it again.                                                 | There's been a few times where I've gone to emergency. You explain the situation - like, you're having trouble breathing as it is. They're trying to say oh, how long have you been like this for? Have [they] got any medical records? You'll see what's the matter with me is! Do you know what I mean? ... and then the next doctor comes in for the next shift. Then they say oh, what are you here for? Talk to each other instead of having to ask the patients. (P8)<br>Then the next doctor comes in for the next shift. Then they say oh, what are you here for, and you've got to explain it. Don't you read the files? Talk to each other, instead of having to ask the patients. (P8) |

|                                        |                  |                                            |                                                                                                                                                                                                                |                                                                                                                                                                                                                                                                                                                                                                                                                                                                                                                                                                                                                                                                                                                                                                                                            |                                                                                                                                                                                                                                                                                                                                                                                                                                                                                                                                                                                                                                                                                                                                                                                  |
|----------------------------------------|------------------|--------------------------------------------|----------------------------------------------------------------------------------------------------------------------------------------------------------------------------------------------------------------|------------------------------------------------------------------------------------------------------------------------------------------------------------------------------------------------------------------------------------------------------------------------------------------------------------------------------------------------------------------------------------------------------------------------------------------------------------------------------------------------------------------------------------------------------------------------------------------------------------------------------------------------------------------------------------------------------------------------------------------------------------------------------------------------------------|----------------------------------------------------------------------------------------------------------------------------------------------------------------------------------------------------------------------------------------------------------------------------------------------------------------------------------------------------------------------------------------------------------------------------------------------------------------------------------------------------------------------------------------------------------------------------------------------------------------------------------------------------------------------------------------------------------------------------------------------------------------------------------|
| Socio-cultural and economic challenges | Social isolation | Impact of having newly moved to the region | <p>I didn't know anyone, you don't like to ask unless they offer</p> <p>Community clinic my only avenue because I didn't know what was available</p> <p>Need somebody who knew me, need care straight away</p> | <p>I wasn't (admitted to hospital), but I felt I should have been, because I wasn't coping. I wasn't well enough to do my own food preparation ... Because I'm fairly new and I'm not a local, I didn't know anyone so you don't like to be asking someone to do those sorts of things (shopping, food preparation) unless they offer <b>(P14)</b></p> <p>The community clinic was the one that I accessed because they HAD TO take new patients. I mean they had more than they could cope with I think, but that was my only avenue at the time because I didn't know what was available ... I needed to access somebody who knew me- because asthma doesn't go by the record sort of thing. You don't know when- and when you get sick, you're sick enough to need care straight away. <b>(P14)</b></p> | <p>Financial hardship</p> <p>Making choices about costs associated with chronic disease</p> <p>It's just another cost</p> <p>If we lived in housing commission you would be subsidised</p> <p>Financial impact was raised several times, with participants having to balance treatments choices as well as resource choices to stay well: 'We chose to increase the temperature of the house by a few degrees. It's just another cost'.<b>(P11)</b></p> <p>Requirements to replace stoves for oxygen therapy safety was another common added burden, and support for such measures perceived to be influenced by social circumstance: 'If you were living in Housing Commission you would be subsidised, but because we were (self-funded retirees) ... nothing'.<b>(P6)</b></p> |
|----------------------------------------|------------------|--------------------------------------------|----------------------------------------------------------------------------------------------------------------------------------------------------------------------------------------------------------------|------------------------------------------------------------------------------------------------------------------------------------------------------------------------------------------------------------------------------------------------------------------------------------------------------------------------------------------------------------------------------------------------------------------------------------------------------------------------------------------------------------------------------------------------------------------------------------------------------------------------------------------------------------------------------------------------------------------------------------------------------------------------------------------------------------|----------------------------------------------------------------------------------------------------------------------------------------------------------------------------------------------------------------------------------------------------------------------------------------------------------------------------------------------------------------------------------------------------------------------------------------------------------------------------------------------------------------------------------------------------------------------------------------------------------------------------------------------------------------------------------------------------------------------------------------------------------------------------------|

COPD: Chronic obstructive pulmonary disease

GP: General Practitioner

P: Participant

## REFERENCES

1. Fromer L. Implementing chronic care for COPD: planned visits, care coordination, and patient empowerment for improved outcomes. *Int J Chron Obstruct Pulmon Dis*. 2011;6:605-14.
2. Adeloje D, Chua S, Lee C, Basquill C, Papan A, Theodoratou E, et al. Global and regional estimates of COPD prevalence: Systematic review and meta-analysis. *Journal of global health*. 2015;5(2):020415.
3. Murray CJ, Atkinson C, Bhalla K, Birbeck G, Burstein R, Chou D, et al. The state of US health, 1990-2010: burden of diseases, injuries, and risk factors. *Jama*. 2013;310(6):591-608.
4. Fletcher M, Upton J, Taylor-Fishwick J, Buist S, Jenkins C, Hutton J, et al. COPD uncovered: an international survey on the impact of chronic obstructive pulmonary disease [COPD] on a working age population. *BMC Public Health*. 2011;11(1):612.
5. Murray SA, Kendall M, Boyd K, Sheikh A. Illness trajectories and palliative care. *Bmj*. 2005;330(7498):1007-11.
6. Rabe KF, Hurd S, Anzueto A, Barnes PJ, Buist SA, Calverley P, et al. Global strategy for the diagnosis, management, and prevention of chronic obstructive pulmonary disease: GOLD executive summary. *American journal of respiratory and critical care medicine*. 2007;176(6):532-55.
7. Hillas G, Perlikos F, Tsiligianni I, Tzanakis N. Managing comorbidities in COPD. *International Journal of Chronic Obstructive Pulmonary Disease*. 2015;10:95-109.
8. Hillas G, Perlikos F, Tsiligianni I, Tzanakis N. Managing comorbidities in COPD. *Int J Chron Obstruct Pulmon Dis*. 2015;10:95-109.
9. Williams V, Hardinge M, Ryan S, Farmer A. Patients' experience of identifying and managing exacerbations in COPD: a qualitative study. *NPJ primary care respiratory medicine*. 2014;24:14062.
10. Bucknall CE, Miller G, Lloyd SM, Cleland J, McCluskey S, Cotton M, et al. Glasgow supported self-management trial (GSuST) for patients with moderate to severe COPD: randomised controlled trial. *BMJ*. 2012;344.
11. Benzo RP, Abascal-Bolado B, Dulohery MM. Self-management and quality of life in chronic obstructive pulmonary disease (COPD): The mediating effects of positive affect. *Patient education and counseling*. 2016;99(4):617-23.
12. Hopley M, Horsburgh M, Peri K. Barriers to accessing specialist care for older people with chronic obstructive pulmonary disease in rural New Zealand. *Journal of primary health care*. 2009;1(3):207-14.
13. Jackson K, Oelke ND, Besner J, Harrison A. Patient journey: implications for improving and integrating care for older adults with chronic obstructive pulmonary disease. *Canadian journal on aging = La revue canadienne du vieillissement*. 2012;31(2):223-33.
14. Swanson E.J., Rice K.L., Rector T.S., Westanmo A.D., Duane P.G. Quality of Chronic Obstructive Pulmonary Disease-Related Health Care in Rural and Urban Veterans Affairs Clinics. *Federal Practitioner*. 2017:27-32.
15. Goodridge D, Hutchinson S, Wilson D, Ross C. Living in a rural area with advanced chronic respiratory illness: a qualitative study. *Primary care respiratory journal : journal of the General Practice Airways Group*. 2011;20(1):54-8.
16. Lockett T, Phillips J, Johnson M, Garcia M, Bhattarai P, Carrieri-Kohlman V, et al. Insights from Australians with respiratory disease living in the community with experience of self-managing through an emergency department 'near miss' for breathlessness: a strengths-based qualitative study. 2017;7(12):e017536.
17. Halting A-G, Wahl A, Heggdal K. 'Belonging'. 'Patients' experiences of social relationships during pulmonary rehabilitation. *Disability and Rehabilitation*. 2010;32(15):1272-80.
18. Disler RT, Green A, Lockett T, Newton PJ, Currow D, Davidson PM. Experience of Advanced Chronic Obstructive Pulmonary Disease: Metasynthesis of Qualitative Research. *Jnl Pain Sym Mgt*. 2014.
19. Lush B, Boddy J. Reflections on the Value of a Supportive 'Village' Culture for Parents, Carers,

- 1  
2  
3 and Families: Findings from a Community Survey. *Journal of Social Inclusion*. 2014;5(2):44-55.
- 4 20. Graham C, Scharlach AE, Kurtovich E. Do villages promote aging in place? Results of a  
5 Longitudinal Study. *Journal of Applied Gerontology*. 2018;37(3):310-31.
- 6 21. McDonough KE, Davitt JK. It takes a village: Community practice, social work, and aging-in-  
7 place. *Journal of Gerontological Social Work*. 2011;54(5):528-41.
- 8 22. Ziersch AM, Baum F, Darmawan IGN, Kavanagh AM, Bentley RJ. Social capital and health in  
9 rural and urban communities in South Australia. *Australian and New Zealand journal of public health*.  
10 2009;33(1):7-16.
- 11 23. Manderson L. Social capital and inclusion: Locating wellbeing in community. *Australian*  
12 *Cultural History*. 2010;28(2-3):233-52.
- 13 24. Brundisini F, Giacomini M, DeJean D, Vanstone M, Winsor S, Smith A. Chronic disease  
14 patients' experiences with accessing health care in rural and remote areas: a systematic review and  
15 qualitative meta-synthesis. *Ontario health technology assessment series*. 2013;13(15):1-33.
- 16 25. Tong A, Sainsbury P, Craig J. Consolidated criteria for reporting qualitative research (COREQ):  
17 a 32-item checklist for interviews and focus groups. *International journal for quality in health care*.  
18 2007;19(6):349-57.
- 19 26. Braun V, Clarke V. Using thematic analysis in psychology. *Qualitative research in psychology*.  
20 2006;3(2):77-101.
- 21 27. Thomas J, Harden A. Methods for the thematic synthesis of qualitative research in  
22 systematic reviews. *BMC Medical Research Methodology*.  
23 2008;8:<http://www.biomedcentral.com/content/pdf/1471-2288-8-45.pdf>.
- 24 28. Victorian Department of Health. Wangaratta. 2012.
- 25 29. State Government of Victoria Department of Health. Benalla. Department of Health; 2014.
- 26 30. Vaske I, Thöne MF, Kühl K, Keil DC, Schürmann W, Rief W, et al. For better or for worse: a  
27 longitudinal study on dyadic coping and quality of life among couples with a partner suffering from  
28 COPD. *Journal of behavioral medicine*. 2015;38(6):851-62.
- 29 31. Creswell JW. *Research Design: Qualitative, Quantitative, and Mixed Methods Approaches*.  
30 3rd ed. London: Sage; 2009.
- 31 32. Davidson PM, Halcomb E, Gholizadeh L. Focus groups in health research and nursing. In:  
32 Liamputtong P, editor. *Research methods in health: Foundations for evidence-based practice*: Oxford  
33 University Press, Australia & New Zealand; 2013. p. 54-71.
- 34 33. Kerr C, Nixon A, Wild D. Assessing and demonstrating data saturation in qualitative inquiry  
35 supporting patient-reported outcomes research. *Expert review of pharmacoeconomics & outcomes*  
36 *research*. 2010;10(3):269-81.
- 37 34. Sossai K, Gray M, Tanner B. Living with chronic obstructive pulmonary disease: experiences  
38 in northern regional Australia. *International Journal of Therapy and Rehabilitation*. 2011;18(11):631-  
39 41.
- 40 35. Gysels M, Higginson I. Self-management for breathlessness in COPD: the role of pulmonary  
41 rehabilitation. *Chronic respiratory disease*. 2009;6(3):133-40.
- 42 36. Trivedi RB, Bryson CL, Udris E, Au DH. The influence of informal caregivers on adherence in  
43 COPD patients. *Annals of Behavioral Medicine*. 2012;44(1):66-72.
- 44 37. Wakabayashi R, Motegi T, Yamada K, Ishii T, Gemma A, Kida K. Presence of in-home  
45 caregiver and health outcomes of older adults with chronic obstructive pulmonary disease. *Journal*  
46 *of the American Geriatrics Society*. 2011;59(1):44-9.
- 47 38. Whalley D, Svedstater H, Doward L, Crawford R, Leather D, Lay-Flurrie J, et al. Follow-up  
48 interviews from The Salford Lung Study (COPD) and analyses per treatment and exacerbations. *NPJ*  
49 *primary care respiratory medicine*. 2019;29(1):20.
- 50 39. Disler RT, Gallagher RD, Davidson PM. Factors influencing self-management in chronic  
51 obstructive pulmonary disease: an integrative review *Int Jnl Nsg Stu*. 2012;49:230-42.
- 52 40. Gardener AC, Ewing G, Kuhn I, Farquhar M. Support needs of patients with COPD: a  
53 systematic literature search and narrative review. *International journal of chronic obstructive*  
54  
55  
56  
57  
58  
59  
60

pulmonary disease. 2018;13:1021.

41. Shipman C, White S, Gysels M, White P. Access to care in advanced COPD: factors that influence contact with general practice services. *Primary care respiratory journal : journal of the General Practice Airways Group*. 2009;18(4):273-8.

42. Waibel S, Vargas I, Aller MB, Gusmao R, Henao D, Vazquez ML. The performance of integrated health care networks in continuity of care: a qualitative multiple case study of COPD patients. *International journal of integrated care*. 2015;15:e029.

43. Lahham A, McDonald CF, Mahal A, Lee AL, Hill CJ, Burge AT, et al. Home-based pulmonary rehabilitation for people with COPD: A qualitative study reporting the patient perspective. *Chronic respiratory disease*. 2018;15(2):123-30.

44. Longman JM, Singer JB, Gao Y, Barclay LM, Passey ME, Pirota JP, et al. Community based service providers' perspectives on frequent and/or avoidable admission of older people with chronic disease in rural NSW: a qualitative study. *BMC Health Serv Res*. 2011;11:265.

45. Walters JA, Cameron-Tucker H, Courtney-Pratt H, Nelson M, Robinson A, Scott J, et al. Supporting health behaviour change in chronic obstructive pulmonary disease with telephone health-mentoring: insights from a qualitative study. *BMC family practice*. 2012;13:55.

46. Kaptein AA, Fischer MJ, Scharloo M. Self-management in patients with COPD: theoretical context, content, outcomes, and integration into clinical care. *Int J Chron Obstruct Pulmon Dis*. 2014;9:907-17.

47. Bourke L, Taylor J, Humphreys JS, Wakerman J. "Rural health is subjective, everyone sees it differently": understandings of rural health among Australian stakeholders. *Health & place*. 2013;24:65-72.

48. Barton C, Effing TW, Cafarella P. Social support and social networks in COPD: A scoping review. *COPD: Journal of Chronic Obstructive Pulmonary Disease*. 2015;12(6):690-702.

49. Russell S, Ogunbayo OJ, Newham JJ, Heslop-Marshall K, Netts P, Hanratty B, et al. Qualitative systematic review of barriers and facilitators to self-management of chronic obstructive pulmonary disease: views of patients and healthcare professionals. *NPJ primary care respiratory medicine*. 2018;28(1):2-.

### Figure legend:

Figure 1:

Facilitators and barriers to COPD self-management in the rural context. Adaptation to the 'new normal' of life with COPD and ability to self-manage were influenced by facilitators and barriers, moderated by inclusion.

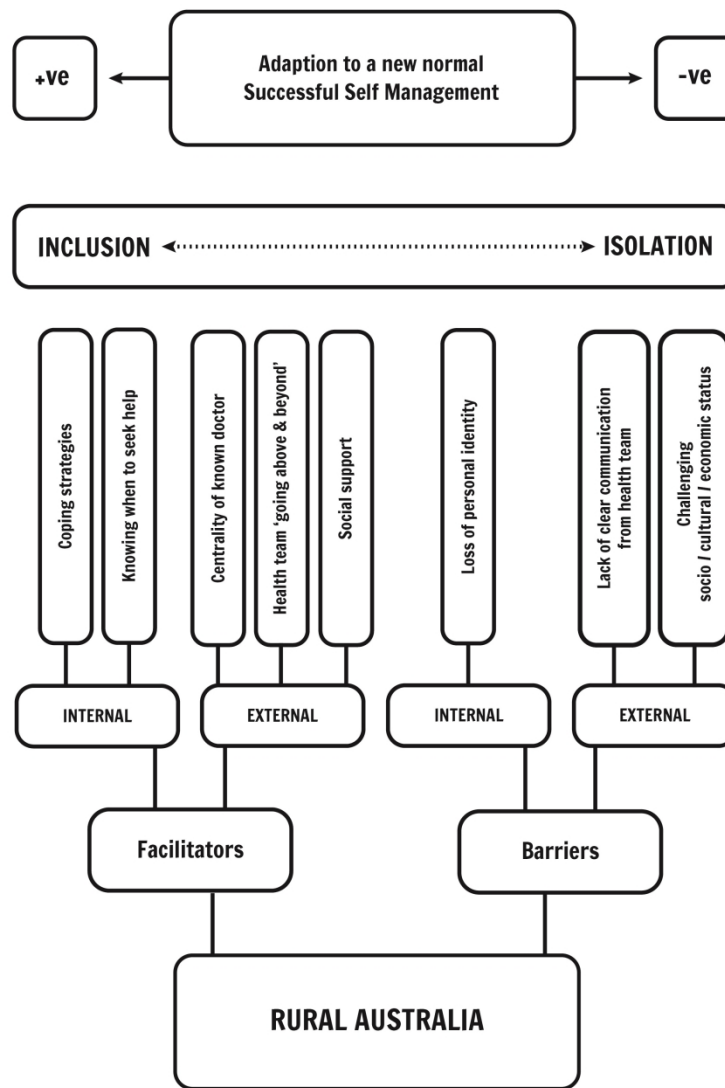

45 Figure 1: Facilitators and barriers to COPD self-management in the rural context. Adaptation to the 'new  
46 normal' of life with COPD and ability to self-manage were influenced by facilitators and barriers, moderated  
47 by inclusion.

48 210x297mm (300 x 300 DPI)

**APPENDIX I INTERVIEW SCHEDULE**

1. Overall, what has your experience of having COPD been like?
2. Can you tell me a little about how and when your illness started and how that led to a diagnosis?  
Can you describe your initial thoughts to being diagnosed?
3. Have you received information about your condition?
4. What sorts of things do you do because of your condition (diet, exercise, use of health services)?
5. What types of support are you currently receiving?
6. How do you feel in yourself nowadays compared to before your diagnosis? How your life is going with your COPD?
7. How has your condition impacted on you financially?
8. How do you feel in yourself nowadays?
9. How has your illness affected your social life, relationships with friends and family?



1  
2  
3  
4  
5  
6  
7  
8  
9  
10  
11  
12  
13  
14  
15  
16  
17  
18  
19  
20  
21  
22  
23  
24  
25  
26  
27  
28  
29  
30  
31  
32  
33  
34  
35  
36  
37  
38  
39  
40  
41  
42  
43  
44  
45  
46

32 item COREQ checklist, as per Tong, Sainsbury & Craig, 2007:

|                                |                                          |                                                                                                                                                  |        |
|--------------------------------|------------------------------------------|--------------------------------------------------------------------------------------------------------------------------------------------------|--------|
| 1.                             | Interviewer/facilitator                  | Which author/s conducted the interview or focus group?                                                                                           | Page 6 |
| 2.                             | Credentials                              | What were the researcher's credentials? <i>E.g. PhD, MD</i>                                                                                      | Page 6 |
| 3.                             | Occupation                               | What was their occupation at the time of the study?                                                                                              | Page 1 |
| 4.                             | Gender                                   | Was the researcher male or female?                                                                                                               | Page 6 |
| 5.                             | Experience and training                  | What experience or training did the researcher have?                                                                                             | Page 6 |
| Relationship with participants |                                          |                                                                                                                                                  |        |
| 6.                             | Relationship established                 | Was a relationship established prior to study commencement?                                                                                      | Page 6 |
| 7.                             | Participant knowledge of the interviewer | What did the participants know about the researcher? <i>e.g. personal goals, reasons for doing the research</i>                                  | Page 6 |
| 8.                             | Interviewer characteristics              | What characteristics were reported about the interviewer/facilitator? <i>e.g. Bias, assumptions, reasons and interests in the research topic</i> | Page 6 |
| <b>Domain 2: study design</b>  |                                          |                                                                                                                                                  |        |

|    |                       |                                                                                             |                                                                                                                 |
|----|-----------------------|---------------------------------------------------------------------------------------------|-----------------------------------------------------------------------------------------------------------------|
| 1  |                       |                                                                                             |                                                                                                                 |
| 2  |                       |                                                                                             |                                                                                                                 |
| 3  |                       |                                                                                             |                                                                                                                 |
| 4  | Theoretical           |                                                                                             |                                                                                                                 |
| 5  | framework             |                                                                                             |                                                                                                                 |
| 6  |                       |                                                                                             |                                                                                                                 |
| 7  |                       |                                                                                             |                                                                                                                 |
| 8  |                       | What methodological orientation was stated to underpin the study? <i>e.g.</i> <i>Page 5</i> |                                                                                                                 |
| 9  | 9.                    | Methodological orientation<br>and Theory                                                    | <i>grounded theory, discourse analysis, ethnography, phenomenology, content analysis</i>                        |
| 10 |                       |                                                                                             |                                                                                                                 |
| 11 |                       |                                                                                             |                                                                                                                 |
| 12 |                       |                                                                                             |                                                                                                                 |
| 13 | Participant selection |                                                                                             |                                                                                                                 |
| 14 |                       |                                                                                             |                                                                                                                 |
| 15 |                       |                                                                                             |                                                                                                                 |
| 16 | 10.                   | Sampling                                                                                    | How were participants selected? <i>e.g.</i> <i>purposive, convenience, consecutive, snowball</i> <i>Page 5</i>  |
| 17 |                       |                                                                                             |                                                                                                                 |
| 18 |                       |                                                                                             |                                                                                                                 |
| 19 |                       |                                                                                             |                                                                                                                 |
| 20 | 11.                   | Method of approach                                                                          | How were participants approached? <i>e.g.</i> <i>face-to-face, telephone, mail, email</i> <i>Page 5</i>         |
| 21 |                       |                                                                                             |                                                                                                                 |
| 22 |                       |                                                                                             |                                                                                                                 |
| 23 | 12.                   | Sample size                                                                                 | How many participants were in the study? <i>Page 7</i>                                                          |
| 24 |                       |                                                                                             |                                                                                                                 |
| 25 |                       |                                                                                             |                                                                                                                 |
| 26 | 13.                   | Non-participation                                                                           | How many people refused to participate or dropped out? Reasons? <i>Page 7</i>                                   |
| 27 |                       |                                                                                             |                                                                                                                 |
| 28 |                       |                                                                                             |                                                                                                                 |
| 29 | Setting               |                                                                                             |                                                                                                                 |
| 30 |                       |                                                                                             |                                                                                                                 |
| 31 | 14.                   | Setting of data collection                                                                  | Where was the data collected? <i>e.g.</i> <i>home, clinic, workplace</i> <i>Page 6</i>                          |
| 32 |                       |                                                                                             |                                                                                                                 |
| 33 |                       |                                                                                             |                                                                                                                 |
| 34 | 15.                   | Presence of non-participants                                                                | Was anyone else present besides the participants and researchers? <i>Page 7</i>                                 |
| 35 |                       |                                                                                             |                                                                                                                 |
| 36 |                       |                                                                                             |                                                                                                                 |
| 37 | 16.                   | Description of sample                                                                       | What are the important characteristics of the sample? <i>e.g.</i> <i>demographic data, date</i> <i>Page 6-7</i> |
| 38 |                       |                                                                                             |                                                                                                                 |
| 39 |                       |                                                                                             |                                                                                                                 |
| 40 |                       |                                                                                             |                                                                                                                 |
| 41 |                       |                                                                                             |                                                                                                                 |
| 42 |                       |                                                                                             |                                                                                                                 |
| 43 |                       |                                                                                             |                                                                                                                 |
| 44 |                       |                                                                                             |                                                                                                                 |
| 45 |                       |                                                                                             |                                                                                                                 |
| 46 |                       |                                                                                             |                                                                                                                 |

1  
2  
3  
4  
5  
6  
7  
8  
9  
10  
11  
12  
13  
14  
15  
16  
17  
18  
19  
20  
21  
22  
23  
24  
25  
26  
27  
28  
29  
30  
31  
32  
33  
34  
35  
36  
37  
38  
39  
40  
41  
42  
43  
44  
45  
46

Data collection

|     |                        |                                                                               |            |
|-----|------------------------|-------------------------------------------------------------------------------|------------|
| 17. | Interview guide        | Were questions, prompts, guides provided by the authors? Was it pilot tested? | Appendix 1 |
| 18. | Repeat interviews      | Were repeat interviews carried out? If yes, how many?                         | NA         |
| 19. | Audio/visual recording | Did the research use audio or visual recording to collect the data?           | Page 6     |
| 20. | Field notes            | Were field notes made during and/or after the interview or focus group?       | NA         |
| 21. | Duration               | What was the duration of the interviews or focus group?                       | Page 7     |
| 22. | Data saturation        | Was data saturation discussed?                                                | Page 6     |
| 23. | Transcripts returned   | Were transcripts returned to participants for comment and/or correction?      | Page 7     |

**Domain 3: analysis and findingsz**

Data analysis

|     |                       |                                      |        |
|-----|-----------------------|--------------------------------------|--------|
| 24. | Number of data coders | How many data coders coded the data? | Page 6 |
|-----|-----------------------|--------------------------------------|--------|

|           |                                |                                                                                                                                          |                      |
|-----------|--------------------------------|------------------------------------------------------------------------------------------------------------------------------------------|----------------------|
| 25.       | Description of the coding tree | Did authors provide a description of the coding tree?                                                                                    | NA                   |
| 26.       | Derivation of themes           | Were themes identified in advance or derived from the data?                                                                              | Page 6               |
| 27.       | Software                       | What software, if applicable, was used to manage the data?                                                                               | Page 6               |
| 28.       | Participant checking           | Did participants provide feedback on the findings?                                                                                       | Page 7               |
| Reporting |                                |                                                                                                                                          |                      |
| 29.       | Quotations presented           | Were participant quotations presented to illustrate the themes / findings? Was each quotation identified? e.g. <i>participant number</i> | Table 1 & pages 8-12 |
| 30.       | Data and findings consistent   | Was there consistency between the data presented and the findings?                                                                       | Page 6               |
| 31.       | Clarity of major themes        | Were major themes clearly presented in the findings?                                                                                     | Figure 1             |
| 32.       | Clarity of minor themes        | Is there a description of diverse cases or discussion of minor themes?                                                                   | Pages 8-12           |
