# Supplementary material for: Benefits of the ‘village’: a qualitative exploration of the patient experience of COPD in rural Australia
Source: PubMed Central journal article supplement — BMJ Open. 2019 Oct 7;9(10):e030953. doi: 10.1136/bmjopen-2019-030953 (PMC6797421; doi:10.1136/bmjopen-2019-030953), 2019-10-07
Supplement: bmjopen-2019-030953supp001.pdf [file bmjopen-2019-030953supp001.pdf]

**APPENDIX I INTERVIEW SCHEDULE**

1. Overall, what has your experience of having COPD been like?
2. Can you tell me a little about how and when your illness started and how that led to a diagnosis?  
Can you describe your initial thoughts to being diagnosed?
3. Have you received information about your condition?
4. What sorts of things do you do because of your condition (diet, exercise, use of health services)?
5. What types of support are you currently receiving?
6. How do you feel in yourself nowadays compared to before your diagnosis? How your life is going with your COPD?
7. How has your condition impacted on you financially?
8. How do you feel in yourself nowadays?
9. How has your illness affected your social life, relationships with friends and family?
